# Supplementary material for: Association between mid-upper arm circumference and cardiometabolic risk in Chinese population: a cross-sectional study
Source: PubMed Central journal article supplement — BMJ Open. 2019 Sep 8;9(9):e028904. doi: 10.1136/bmjopen-2019-028904 (PMC6738736; doi:10.1136/bmjopen-2019-028904), 2019-09-08

### Online Supplemental Information

#### Association between mid-upper arm circumference and cardiometabolic risk in Chinese population: a cross-sectional study

**Supplemental Table 1.** The association of mid-upper arm circumference with cardiometabolic profiles in total participants

#### Supplemental Figure Legend

**Supplemental Figure 1.** Stratified analysis of the association of mid-upper arm circumference with risk of subclinical atherosclerosis in men. A: All subjects were divided into subgroups based on their average age (age < 62 years, age  $\geq$  62 years), body mass index (BMI < 25 kg/m<sup>2</sup>, BMI  $\geq$  25 kg/m<sup>2</sup>), or waist circumference (WC < 88 cm or WC  $\geq$  88 cm). B: All subjects were divided into subgroups based on diabetes (yes or no), insulin resistance (yes or no), or hypertension (yes or no). Data were presented as odds ratio (OR) and 95% confidence interval (CI). *P* values were calculated from multivariable logistic regression analysis. Adjusted for age (years), body mass index (kg/m<sup>2</sup>), current smoking (yes or no), current drinking (yes or no), physical activity (MET-h/wk), waist circumference (cm), C-reactive protein (mg/L), total cholesterol (mmol/L), HDL cholesterol (mmol/L), LDL cholesterol (mmol/L), triglycerides (mmol/L), fasting plasma glucose (mmol/L), and systolic blood pressure (mmHg).

**Supplemental Table 1. The association of mid-upper arm circumference with cardiometabolic profiles in total participants**

|                                      | Model 1            |         | Model 2           |         | Model 3            |         |
|--------------------------------------|--------------------|---------|-------------------|---------|--------------------|---------|
|                                      | $\beta \pm SE$     | P value | $\beta \pm SE$    | P value | $\beta \pm SE$     | P value |
| Age (years)                          | -0.20 $\pm$ 0.04   | <0.0001 | /                 | /       | /                  | /       |
| Body mass index (kg/m <sup>2</sup> ) | 0.70 $\pm$ 0.02    | <0.0001 | /                 | /       | /                  | /       |
| Waist circumference (cm)             | 1.94 $\pm$ 0.03    | <0.0001 | 1.62 $\pm$ 0.04   | <0.0001 | /                  | /       |
| Systolic blood pressure (mmHg)       | 0.55 $\pm$ 0.07    | <0.0001 | 0.49 $\pm$ 0.09   | <0.0001 | 0.20 $\pm$ 0.10    | 0.04    |
| Diastolic blood pressure (mmHg)      | 0.49 $\pm$ 0.04    | <0.0001 | 0.32 $\pm$ 0.05   | <0.0001 | 0.08 $\pm$ 0.06    | 0.15    |
| Fasting plasma glucose (mmol/L)      | 0.03 $\pm$ 0.01    | <0.0001 | 0.02 $\pm$ 0.01   | 0.01    | -0.02 $\pm$ 0.01   | 0.04    |
| HOMA-IR                              | 0.03 $\pm$ 0.001   | <0.0001 | 0.02 $\pm$ 0.001  | <0.0001 | 0.01 $\pm$ 0.002   | 0.0003  |
| Total cholesterol (mmol/L)           | -0.004 $\pm$ 0.004 | 0.30    | 0.004 $\pm$ 0.005 | 0.48    | -0.01 $\pm$ 0.01   | 0.24    |
| LDL cholesterol (mmol/L)             | 0.009 $\pm$ 0.003  | 0.005   | 0.01 $\pm$ 0.004  | 0.001   | 0.001 $\pm$ 0.005  | 0.79    |
| HDL cholesterol (mmol/L)             | -0.02 $\pm$ 0.001  | <0.0001 | -0.01 $\pm$ 0.001 | <0.0001 | -0.003 $\pm$ 0.002 | 0.08    |

|                           |               |         |               |         |               |       |
|---------------------------|---------------|---------|---------------|---------|---------------|-------|
| Triglycerides (mmol/L)    | 0.01 ± 0.001  | <0.0001 | 0.01 ± 0.001  | <0.0001 | 0.001 ± 0.001 | 0.38  |
| C-reactive protein (mg/L) | 0.01 ± 0.001  | <0.0001 | 0.01 ± 0.001  | <0.0001 | 0.002 ± 0.002 | 0.12  |
| CIMT (cm)                 | 0.003 ± 0.001 | <0.0001 | 0.003 ± 0.001 | 0.0002  | 0.002 ± 0.001 | 0.005 |

Data are linear regression estimates ± standard error ( $\beta \pm SE$ ). P values were calculated from multivariable linear regression model. Model 1: unadjusted;

Model 2: adjusted for age (years), sex, body mass index (kg/m<sup>2</sup>), current smoking (yes or no), current drinking (yes or no), physical activity (MET-h/wk);

Model 3: further adjusted for waist circumference (cm). Abbreviations: LDL, low-density lipoprotein; HDL, high-density lipoprotein; CIMT, carotid

intima-media thickness.

## Supplemental Figure 1

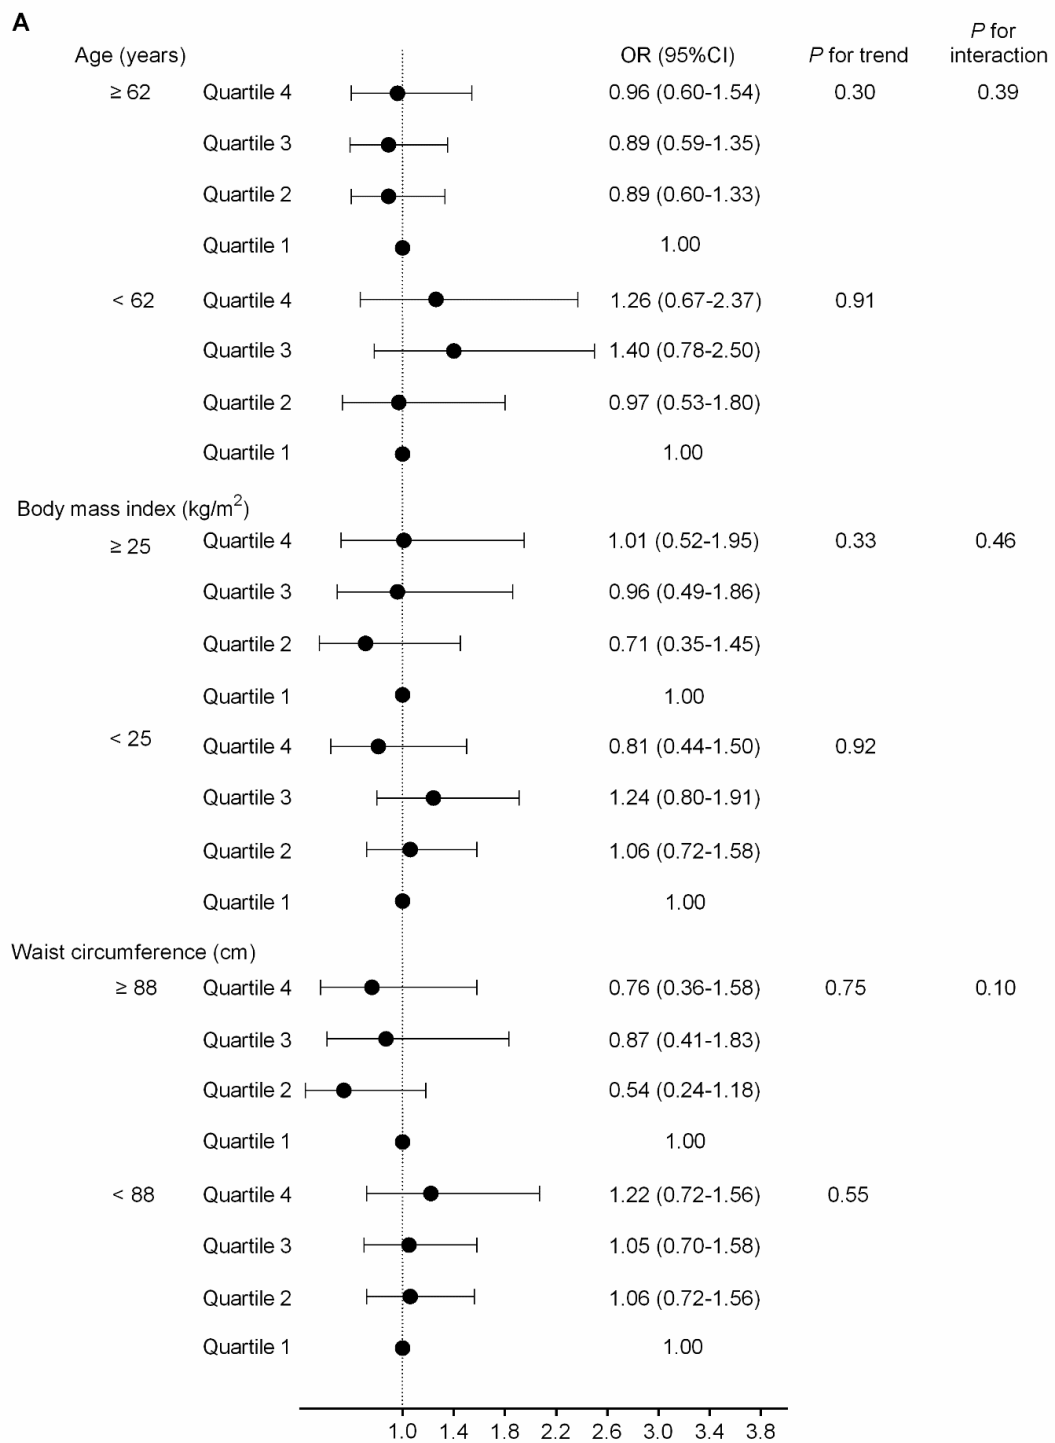

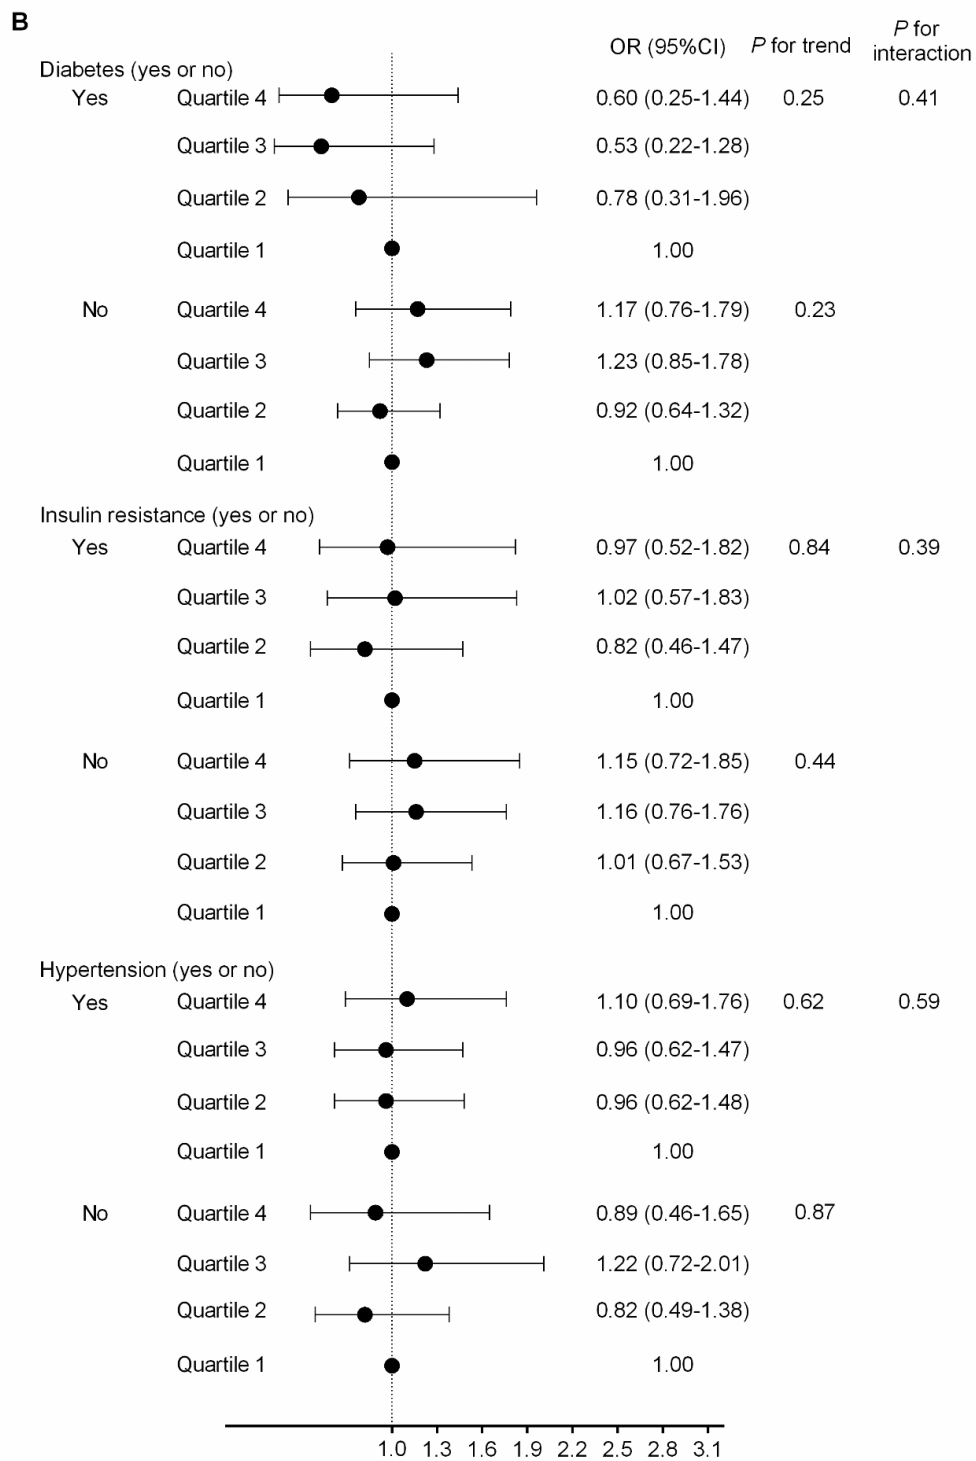

Supplement: bmjopen-2019-028904supp001.pdf [file bmjopen-2019-028904supp001.pdf]
