# Supplementary material for: Association between mid-upper arm circumference and cardiometabolic risk in Chinese population: a cross-sectional study
Source: PubMed Central journal article supplement — BMJ Open. 2019 Sep 8;9(9):e028904. doi: 10.1136/bmjopen-2019-028904 (PMC6738736; doi:10.1136/bmjopen-2019-028904), 2019-09-08
Supplement: bmjopen-2019-028904.draft_revisions.pdf [file bmjopen-2019-028904.draft_revisions.pdf]

# BMJ Open

BMJ Open is committed to open peer review. As part of this commitment we make the peer review history of every article we publish publicly available.

When an article is published we post the peer reviewers' comments and the authors' responses online. We also post the versions of the paper that were used during peer review. These are the versions that the peer review comments apply to.

The versions of the paper that follow are the versions that were submitted during the peer review process. They are not the versions of record or the final published versions. They should not be cited or distributed as the published version of this manuscript.

BMJ Open is an open access journal and the full, final, typeset and author-corrected version of record of the manuscript is available on our site with no access controls, subscription charges or pay-per-view fees (<http://bmjopen.bmj.com>).

If you have any questions on BMJ Open's open peer review process please email [info.bmjopen@bmj.com](mailto:info.bmjopen@bmj.com)

# BMJ Open

## The mid-upper arm circumference is associated with an increased cardiometabolic risk in middle aged and elderly Chinese population

|                               |                                                                                                                                                                                                                                                                                                                                                                                                                                                                                                                                                                                                                                                                                                                                                                                                                                                                                                                                                                                                                                                                                                                                                                                                                                                                                                                                                                                                                                                                                                 |
|-------------------------------|-------------------------------------------------------------------------------------------------------------------------------------------------------------------------------------------------------------------------------------------------------------------------------------------------------------------------------------------------------------------------------------------------------------------------------------------------------------------------------------------------------------------------------------------------------------------------------------------------------------------------------------------------------------------------------------------------------------------------------------------------------------------------------------------------------------------------------------------------------------------------------------------------------------------------------------------------------------------------------------------------------------------------------------------------------------------------------------------------------------------------------------------------------------------------------------------------------------------------------------------------------------------------------------------------------------------------------------------------------------------------------------------------------------------------------------------------------------------------------------------------|
| Journal:                      | <i>BMJ Open</i>                                                                                                                                                                                                                                                                                                                                                                                                                                                                                                                                                                                                                                                                                                                                                                                                                                                                                                                                                                                                                                                                                                                                                                                                                                                                                                                                                                                                                                                                                 |
| Manuscript ID                 | bmjopen-2019-028904                                                                                                                                                                                                                                                                                                                                                                                                                                                                                                                                                                                                                                                                                                                                                                                                                                                                                                                                                                                                                                                                                                                                                                                                                                                                                                                                                                                                                                                                             |
| Article Type:                 | Research                                                                                                                                                                                                                                                                                                                                                                                                                                                                                                                                                                                                                                                                                                                                                                                                                                                                                                                                                                                                                                                                                                                                                                                                                                                                                                                                                                                                                                                                                        |
| Date Submitted by the Author: | 02-Jan-2019                                                                                                                                                                                                                                                                                                                                                                                                                                                                                                                                                                                                                                                                                                                                                                                                                                                                                                                                                                                                                                                                                                                                                                                                                                                                                                                                                                                                                                                                                     |
| Complete List of Authors:     | Hou, Yanan; Shanghai Jiao Tong University Medical School Affiliated Ruijin Hospital<br>Jia, Xu; Shanghai Jiao Tong University Medical School Affiliated Ruijin Hospital<br>Xuan, Liping; Shanghai Jiao Tong University Medical School Affiliated Ruijin Hospital<br>Zhu, Wen; Shanghai Jiao Tong University Medical School Affiliated Ruijin Hospital<br>Deng, Chanjuan; Shanghai Jiao Tong University Medical School Affiliated Ruijin Hospital<br>Wang, Long; Shanghai Jiao Tong University Medical School Affiliated Ruijin Hospital<br>Zhao, Zhiyun; Shanghai Jiao Tong University Medical School Affiliated Ruijin Hospital<br>Li, Mian; Shanghai Jiao Tong University Medical School Affiliated Ruijin Hospital<br>Lu, Jieli; Rui-Jin Hospital, Shanghai Jiao-Tong University School of Medicine, Department of Endocrine and Metabolic Diseases<br>Xu, Yu; Shanghai Jiao Tong University Medical School Affiliated Ruijin Hospital<br>Chen, Yuhong; Shanghai Jiao Tong University Medical School Affiliated Ruijin Hospital<br>Wang, Weiqing; Shanghai Jiao Tong University Medical School Affiliated Ruijin Hospital<br>Bi, Yufang; Rui-Jin Hospital, Shanghai Jiao-Tong University School of Medicine, Department of Endocrine and Metabolic Diseases<br>Xu, Min; Rui-Jin Hospital, Shanghai Jiao-Tong University School of Medicine, Shanghai Institute of Endocrine and Metabolic Diseases<br>Wang, Tiange; Shanghai Jiao Tong University Medical School Affiliated Ruijin Hospital, |
| Keywords:                     | cardiometabolic risk, mid-upper arm circumference, subclinical atherosclerosis, upper body fat                                                                                                                                                                                                                                                                                                                                                                                                                                                                                                                                                                                                                                                                                                                                                                                                                                                                                                                                                                                                                                                                                                                                                                                                                                                                                                                                                                                                  |
|                               |                                                                                                                                                                                                                                                                                                                                                                                                                                                                                                                                                                                                                                                                                                                                                                                                                                                                                                                                                                                                                                                                                                                                                                                                                                                                                                                                                                                                                                                                                                 |

1  
2  
3  
4  
5  
6  
7  
8  
9  
10  
11  
12  
13  
14  
15  
16  
17  
18  
19  
20  
21  
22  
23  
24  
25  
26  
27  
28  
29  
30  
31  
32  
33  
34  
35  
36  
37  
38  
39  
40  
41  
42  
43  
44  
45  
46  
47  
48  
49  
50  
51  
52  
53  
54  
55  
56  
57  
58  
59  
60

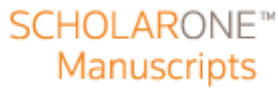

1  
2  
3  
4 **The mid-upper arm circumference is associated with an increased cardiometabolic**  
5  
6 **risk in middle aged and elderly Chinese population**  
7  
8  
9

10  
11 **Running title: Upper body fat and cardiometabolic risk**  
12  
13

14  
15  
16 Yanan HOU<sup>1,2</sup>, Xu JIA<sup>1,2</sup>, Liping XUAN<sup>1,2</sup>, Wen ZHU<sup>1,2</sup>, Chanjuan DENG<sup>1,2</sup>, Long  
17  
18 WANG<sup>1,2</sup>, Zhiyun ZHAO<sup>1,2</sup>, Mian LI<sup>1,2</sup>, Jieli LU<sup>1,2</sup>, Yu XU<sup>1,2</sup>, Yuhong CHEN<sup>1,2</sup>,  
19  
20 Weiqing WANG<sup>1,2</sup>, Yufang BI<sup>1,2</sup>, Min XU<sup>1,2</sup>, Tiange WANG<sup>1,2¶</sup>  
21  
22  
23  
24  
25  
26

27 <sup>1</sup> Shanghai National Clinical Center for Endocrine and Metabolic Diseases,  
28  
29 Collaborative Innovation Center of Systems Biomedicine, Rui-Jin Hospital, Shanghai  
30  
31 Jiao Tong University School of Medicine, Shanghai, 200025, China;  
32  
33

34  
35 <sup>2</sup> Shanghai Institute of Endocrine and Metabolic Diseases, Rui-Jin Hospital, Shanghai  
36  
37 Jiao Tong University School of Medicine, Shanghai, 200025, China.  
38  
39  
40  
41

42 **¶Corresponding author:**  
43

44  
45 Dr. Tiange WANG, MD & PhD  
46

47  
48 Shanghai National Clinical Center for Endocrine and Metabolic Diseases, Shanghai  
49  
50 Institute of Endocrine and Metabolic Diseases, Rui-Jin Hospital, Shanghai Jiao Tong  
51  
52 University School of Medicine, 197 Rui-Jin 2nd Road, Shanghai 200025, China;  
53  
54 Telephone: 86-21-64370045; Fax: 86-21-64749885; E-mail: [wtg@live.cn](mailto:wtg@live.cn)  
55  
56  
57  
58  
59  
60

## Abstract

**Objectives:** Upper body fat is suggested to be associated with increased cardiometabolic risk. We aimed to investigate the associations of mid-upper arm circumference (MUAC) with the cardiometabolic risk factors or biomarkers and subclinical atherosclerosis, which was indicated as elevated carotid intima media thickness (CIMT) in Chinese population.

**Methods:** A cross-sectional analysis was conducted in 6570 middle aged and elderly participants who were from a well-defined community in 2014, Shanghai, China. We assessed the association of MUAC with adiposity, blood glucose, lipids, insulin resistance and blood pressure levels, and as well as the CIMT. An average value of the both sides of the carotids greater than 0.8 mm was defined as subclinical atherosclerosis.

**Results:** MUAC was positively associated with body mass index (BMI), waist circumference, systolic blood pressure, insulin resistance index and CIMT; while inversely related to fasting plasma glucose. MUAC was also positively associated with risk of multi cardiometabolic disorders, such as central obesity, hypertension, hypertriglyceridemia and low HDL cholesterol. As compared to quartile one of MUAC, quartile 2 to 4 of MUAC was significantly associated with an increased risk of subclinical atherosclerosis (OR = 1.31, 95% CI [1.09-1.58], 1.33 [1.10-1.62], and 1.45 [1.16-1.80], respectively;  $P_{for\ trend} = 0.005$ ), after adjustments for the confounding factors. Moreover, these associations were more prominent in women who are older, more obese and with insulin resistance, diabetes, and hypertension than that in men.

**Conclusion:** The MUAC was significantly and independently associated with an increased risk of cardiometabolic disorders and subclinical atherosclerosis in women.

**Keywords:** cardiometabolic risk, mid-upper arm circumference, subclinical atherosclerosis, upper body fat

**Strengths and limitations of this study:**

- The strength of the current study was evidenced by a well-defined community setting, fair sized sample volume, and desirable population homogeneity.
- We comprehensively determine the association of MUAC with a wide spectrum of cardiometabolic risk profile including subclinical atherosclerosis.
- Although our finding supported that it can be a reliable surrogate of upper body adiposity, MUAC is a measure comprised of both adipose and lean tissue rather than a direct indicator for adiposity
- As body composition changes over time, the narrow range of age for the participants enrolled could affected the outcome.
- Since our study was performed in a Chinese population, it should be cautiously to generalize the results to the other ethnicities.

## Introduction

Cardiometabolic disease describes a spectrum of interconnected pathological alterations in the cardiovascular system and metabolic organs that symbiotically increase risk of cardiovascular disease (CVD).<sup>1</sup> Most of the common metabolic disorders, including obesity, diabetes, insulin resistance, dyslipidemia, and hypertension contribute to development of CVD that made CVD became a major cause of mortality and burden of healthcare expenditure worldwide, accounting for 17.3 million deaths per year.<sup>2-5</sup> Early identification and personalized prevention to curb CVD become a big challenge.

As a common contributor of CVD goes through a protracted subclinical phase, atherosclerosis could only be detected at an advanced stage of CVD.<sup>6,7</sup> Thus, identification of subclinical atherosclerosis in the asymptomatic period is critical for early prevention of CVD progression. Noninvasive ultrasonography measured carotid intima media thickness (CIMT) is a well-established clinical index for early arteriosclerosis detection and therefore has been extensively adopted around the world.<sup>8</sup>

Meanwhile, fat distribution, specifically upper body and visceral adiposity, is proven highly relevant with cardiovascular risk.<sup>9,10</sup> In addition to the conventional body fat indices such as body mass index (BMI) and waist circumference (WC), mid-upper arm circumference (MUAC), as a novel anthropometric measurement, was widely used for diagnosing malnutrition, adiposity and chronic diseases.<sup>11</sup> A cross-sectional study using data from the 1999 to 2006 National Health and Nutrition Examination Survey (NHANES) reported that MUAC was positively associated with insulin resistance in the non-obese subjects; while no significant association in obese ones.<sup>9</sup> Another follow up

1  
2  
3  
4 study from the British National Diet and Nutrition Survey, which were included 1054  
5  
6 participants aged  $\geq 65$  years and followed up for more than 15 years, demonstrated that  
7  
8 MUAC was significantly and inversely associated with risk of all-cause mortality.<sup>12</sup>  
9  
10

11 To our knowledge, few studies have been systematically and comprehensively  
12  
13 evaluated the association of cardiovascular risk factors with MUAC in East Asian  
14  
15 populations. Hence, our study aimed to explore the association of MUAC with a  
16  
17 spectrum of cardiometabolic risk factors.  
18  
19  
20  
21  
22  
23

## 24 **Methods**

### 25 **Study population**

26  
27 This is a population-based cross-sectional analysis based on one of the follow-up circle  
28  
29 of our previous community-based cohort study.<sup>13,14</sup> The study participants were enrolled  
30  
31 from Jiading district, Shanghai, China, from August 2014 to May 2015. A total of 6570  
32  
33 participants aged 40 years or above were invited and participated in this examination,  
34  
35 which including a questionnaire to collect the lifestyle information, the disease history  
36  
37 and medicine use, etc, anthropometry measurements, blood sampling and measurements  
38  
39 to assess the early indicators of atherosclerosis. 283 individuals were excluded from the  
40  
41 final analysis due to missing information on MUAC or CIMT. Thus, 6287 participants  
42  
43 were finally included in our study. The study was approved by the Institutional Review  
44  
45 Board of Ruijin Hospital Affiliated to Shanghai Jiao Tong University School of  
46  
47  
48  
49  
50  
51  
52  
53  
54  
55  
56  
57  
58  
59  
60  
61  
62  
63  
64  
65  
66  
67  
68  
69  
70  
71  
72  
73  
74  
75  
76  
77  
78  
79  
80  
81  
82  
83  
84  
85  
86  
87  
88  
89  
90  
91  
92  
93  
94  
95  
96  
97  
98  
99  
100  
101  
102  
103  
104  
105  
106  
107  
108  
109  
110  
111  
112  
113  
114  
115  
116  
117  
118  
119  
120  
121  
122  
123  
124  
125  
126  
127  
128  
129  
130  
131  
132  
133  
134  
135  
136  
137  
138  
139  
140  
141  
142  
143  
144  
145  
146  
147  
148  
149  
150  
151  
152  
153  
154  
155  
156  
157  
158  
159  
160  
161  
162  
163  
164  
165  
166  
167  
168  
169  
170  
171  
172  
173  
174  
175  
176  
177  
178  
179  
180  
181  
182  
183  
184  
185  
186  
187  
188  
189  
190  
191  
192  
193  
194  
195  
196  
197  
198  
199  
200  
201  
202  
203  
204  
205  
206  
207  
208  
209  
210  
211  
212  
213  
214  
215  
216  
217  
218  
219  
220  
221  
222  
223  
224  
225  
226  
227  
228  
229  
230  
231  
232  
233  
234  
235  
236  
237  
238  
239  
240  
241  
242  
243  
244  
245  
246  
247  
248  
249  
250  
251  
252  
253  
254  
255  
256  
257  
258  
259  
260  
261  
262  
263  
264  
265  
266  
267  
268  
269  
270  
271  
272  
273  
274  
275  
276  
277  
278  
279  
280  
281  
282  
283  
284  
285  
286  
287  
288  
289  
290  
291  
292  
293  
294  
295  
296  
297  
298  
299  
300  
301  
302  
303  
304  
305  
306  
307  
308  
309  
310  
311  
312  
313  
314  
315  
316  
317  
318  
319  
320  
321  
322  
323  
324  
325  
326  
327  
328  
329  
330  
331  
332  
333  
334  
335  
336  
337  
338  
339  
340  
341  
342  
343  
344  
345  
346  
347  
348  
349  
350  
351  
352  
353  
354  
355  
356  
357  
358  
359  
360  
361  
362  
363  
364  
365  
366  
367  
368  
369  
370  
371  
372  
373  
374  
375  
376  
377  
378  
379  
380  
381  
382  
383  
384  
385  
386  
387  
388  
389  
390  
391  
392  
393  
394  
395  
396  
397  
398  
399  
400  
401  
402  
403  
404  
405  
406  
407  
408  
409  
410  
411  
412  
413  
414  
415  
416  
417  
418  
419  
420  
421  
422  
423  
424  
425  
426  
427  
428  
429  
430  
431  
432  
433  
434  
435  
436  
437  
438  
439  
440  
441  
442  
443  
444  
445  
446  
447  
448  
449  
450  
451  
452  
453  
454  
455  
456  
457  
458  
459  
460  
461  
462  
463  
464  
465  
466  
467  
468  
469  
470  
471  
472  
473  
474  
475  
476  
477  
478  
479  
480  
481  
482  
483  
484  
485  
486  
487  
488  
489  
490  
491  
492  
493  
494  
495  
496  
497  
498  
499  
500  
501  
502  
503  
504  
505  
506  
507  
508  
509  
510  
511  
512  
513  
514  
515  
516  
517  
518  
519  
520  
521  
522  
523  
524  
525  
526  
527  
528  
529  
530  
531  
532  
533  
534  
535  
536  
537  
538  
539  
540  
541  
542  
543  
544  
545  
546  
547  
548  
549  
550  
551  
552  
553  
554  
555  
556  
557  
558  
559  
560  
561  
562  
563  
564  
565  
566  
567  
568  
569  
570  
571  
572  
573  
574  
575  
576  
577  
578  
579  
580  
581  
582  
583  
584  
585  
586  
587  
588  
589  
590  
591  
592  
593  
594  
595  
596  
597  
598  
599  
600  
601  
602  
603  
604  
605  
606  
607  
608  
609  
610  
611  
612  
613  
614  
615  
616  
617  
618  
619  
620  
621  
622  
623  
624  
625  
626  
627  
628  
629  
630  
631  
632  
633  
634  
635  
636  
637  
638  
639  
640  
641  
642  
643  
644  
645  
646  
647  
648  
649  
650  
651  
652  
653  
654  
655  
656  
657  
658  
659  
660  
661  
662  
663  
664  
665  
666  
667  
668  
669  
670  
671  
672  
673  
674  
675  
676  
677  
678  
679  
680  
681  
682  
683  
684  
685  
686  
687  
688  
689  
690  
691  
692  
693  
694  
695  
696  
697  
698  
699  
700  
701  
702  
703  
704  
705  
706  
707  
708  
709  
710  
711  
712  
713  
714  
715  
716  
717  
718  
719  
720  
721  
722  
723  
724  
725  
726  
727  
728  
729  
730  
731  
732  
733  
734  
735  
736  
737  
738  
739  
740  
741  
742  
743  
744  
745  
746  
747  
748  
749  
750  
751  
752  
753  
754  
755  
756  
757  
758  
759  
760  
761  
762  
763  
764  
765  
766  
767  
768  
769  
770  
771  
772  
773  
774  
775  
776  
777  
778  
779  
780  
781  
782  
783  
784  
785  
786  
787  
788  
789  
790  
791  
792  
793  
794  
795  
796  
797  
798  
799  
800  
801  
802  
803  
804  
805  
806  
807  
808  
809  
810  
811  
812  
813  
814  
815  
816  
817  
818  
819  
820  
821  
822  
823  
824  
825  
826  
827  
828  
829  
830  
831  
832  
833  
834  
835  
836  
837  
838  
839  
840  
841  
842  
843  
844  
845  
846  
847  
848  
849  
850  
851  
852  
853  
854  
855  
856  
857  
858  
859  
860  
861  
862  
863  
864  
865  
866  
867  
868  
869  
870  
871  
872  
873  
874  
875  
876  
877  
878  
879  
880  
881  
882  
883  
884  
885  
886  
887  
888  
889  
890  
891  
892  
893  
894  
895  
896  
897  
898  
899  
900  
901  
902  
903  
904  
905  
906  
907  
908  
909  
910  
911  
912  
913  
914  
915  
916  
917  
918  
919  
920  
921  
922  
923  
924  
925  
926  
927  
928  
929  
930  
931  
932  
933  
934  
935  
936  
937  
938  
939  
940  
941  
942  
943  
944  
945  
946  
947  
948  
949  
950  
951  
952  
953  
954  
955  
956  
957  
958  
959  
960  
961  
962  
963  
964  
965  
966  
967  
968  
969  
970  
971  
972  
973  
974  
975  
976  
977  
978  
979  
980  
981  
982  
983  
984  
985  
986  
987  
988  
989  
990  
991  
992  
993  
994  
995  
996  
997  
998  
999  
1000



## Data collection and biochemical measurements

Detailed information on sociodemographic characteristics, family history, medical history, physical activity and health-related lifestyle were obtained using a standard questionnaire by trained personnel. Anthropometric measurements such as height, weight, waist circumference, and MUAC were assessed by well-trained physician according to a standard protocol. Body height and weight were measured with participants wearing light clothes without shoes to the nearest 0.1 centimeter (cm) and 0.1 kilogram (kg). BMI was calculated as body weight in kilograms divided by body height squared in meters ( $\text{kg}/\text{m}^2$ ). MUAC was measured on the upper left arm (halfway between the acromion process and the olecranon process) with subject's bilateral arms hanging down naturally.<sup>15</sup> WC was measured at the level of the umbilicus with the patient in the standing position. Systolic and diastolic blood pressures were measured in the non-dominant arm with an automated electronic sphygmomanometer (OMRON Model HEM-752 FUZZY, Omron Company, Dalian, China) three times (averaged for analysis) consecutively with 1 min intervals after at least 5 min rest in a seated position.

All individuals underwent a 75-g glucose tolerance test (OGTT) after an overnight fasting (nothing by mouth after midnight), of whom fasting plasma glucose and OGTT 2-hour plasma glucose were measured using hexokinase method on a clinical chemistry diagnostic system (Beckman coulter AU5800). Serum concentrations of total cholesterol, triglycerides, high-density lipoprotein (HDL-C) and low-density lipoprotein (LDL-C) cholesterol were measured by an autoanalyzer (Beckman coulter AU5800). High sensitive C-reactive protein concentration was determined by highly sensitive

1  
2  
3  
4 competitive immunoassay (antigens and antibodies from Beckman coulter  
5  
6 IMMAGE800). Serum insulin was measured by using the electrochemiluminescence  
7  
8 methods on an Immunology analyzer (Roche cobas e 60, Roche Diagnostics,  
9  
10 Switzerland). Insulin resistance index (homeostasis model assessment of insulin  
11  
12 resistance, HOMA-IR) was calculated as fasting insulin ( $\mu\text{IU}/\text{mL}$ )  $\times$  fasting plasma  
13  
14 glucose ( $\text{mmol}/\text{L}$ ) / 22.5, and insulin resistance was defined as HOMA-IR  $\geq$  2.8, which  
15  
16  
17  
18  
19 is the cut-off point for the highest quartile of the total participants.  
20  
21  
22  
23  
24

### 25 **Definitions**

26  
27 Type 2 diabetes was defined as fasting plasma glucose  $\geq$  7.0 mmol/L or OGTT 2-hour  
28  
29 plasma glucose  $\geq$  11.1 mmol/L or use of anti-diabetic agents.<sup>16</sup> Hypertension was  
30  
31 defined as systolic blood pressure  $\geq$  140 mmHg, diastolic blood pressure  $\geq$  90 mmHg or  
32  
33 current taking an antihypertensive medication.<sup>17</sup> Central obesity was defined as WC  $\geq$   
34  
35 102 cm for men and  $\geq$  88 cm for women. Hypertriglyceridemia was defined as  
36  
37 triglycerides  $\geq$  2.26 mmol/L; Low HDL cholesterol was defined as HDL-C  $<$  1.04  
38  
39 mmol/L. Cardiometabolic disorders was defined as status with central obesity, diabetes,  
40  
41 hypertension, hypertriglyceridemia, or low HDL cholesterol. Current smokers or  
42  
43  
44  
45  
46  
47  
48  
49  
50  
51  
52  
53  
54  
55  
56  
57  
58  
59  
60  
61  
62  
63  
64  
65  
66  
67  
68  
69  
70  
71  
72  
73  
74  
75  
76  
77  
78  
79  
80  
81  
82  
83  
84  
85  
86  
87  
88  
89  
90  
91  
92  
93  
94  
95  
96  
97  
98  
99  
100  
101  
102  
103  
104  
105  
106  
107  
108  
109  
110  
111  
112  
113  
114  
115  
116  
117  
118  
119  
120  
121  
122  
123  
124  
125  
126  
127  
128  
129  
130  
131  
132  
133  
134  
135  
136  
137  
138  
139  
140  
141  
142  
143  
144  
145  
146  
147  
148  
149  
150  
151  
152  
153  
154  
155  
156  
157  
158  
159  
160  
161  
162  
163  
164  
165  
166  
167  
168  
169  
170  
171  
172  
173  
174  
175  
176  
177  
178  
179  
180  
181  
182  
183  
184  
185  
186  
187  
188  
189  
190  
191  
192  
193  
194  
195  
196  
197  
198  
199  
200  
201  
202  
203  
204  
205  
206  
207  
208  
209  
210  
211  
212  
213  
214  
215  
216  
217  
218  
219  
220  
221  
222  
223  
224  
225  
226  
227  
228  
229  
230  
231  
232  
233  
234  
235  
236  
237  
238  
239  
240  
241  
242  
243  
244  
245  
246  
247  
248  
249  
250  
251  
252  
253  
254  
255  
256  
257  
258  
259  
260  
261  
262  
263  
264  
265  
266  
267  
268  
269  
270  
271  
272  
273  
274  
275  
276  
277  
278  
279  
280  
281  
282  
283  
284  
285  
286  
287  
288  
289  
290  
291  
292  
293  
294  
295  
296  
297  
298  
299  
300  
301  
302  
303  
304  
305  
306  
307  
308  
309  
310  
311  
312  
313  
314  
315  
316  
317  
318  
319  
320  
321  
322  
323  
324  
325  
326  
327  
328  
329  
330  
331  
332  
333  
334  
335  
336  
337  
338  
339  
340  
341  
342  
343  
344  
345  
346  
347  
348  
349  
350  
351  
352  
353  
354  
355  
356  
357  
358  
359  
360  
361  
362  
363  
364  
365  
366  
367  
368  
369  
370  
371  
372  
373  
374  
375  
376  
377  
378  
379  
380  
381  
382  
383  
384  
385  
386  
387  
388  
389  
390  
391  
392  
393  
394  
395  
396  
397  
398  
399  
400  
401  
402  
403  
404  
405  
406  
407  
408  
409  
410  
411  
412  
413  
414  
415  
416  
417  
418  
419  
420  
421  
422  
423  
424  
425  
426  
427  
428  
429  
430  
431  
432  
433  
434  
435  
436  
437  
438  
439  
440  
441  
442  
443  
444  
445  
446  
447  
448  
449  
450  
451  
452  
453  
454  
455  
456  
457  
458  
459  
460  
461  
462  
463  
464  
465  
466  
467  
468  
469  
470  
471  
472  
473  
474  
475  
476  
477  
478  
479  
480  
481  
482  
483  
484  
485  
486  
487  
488  
489  
490  
491  
492  
493  
494  
495  
496  
497  
498  
499  
500  
501  
502  
503  
504  
505  
506  
507  
508  
509  
510  
511  
512  
513  
514  
515  
516  
517  
518  
519  
520  
521  
522  
523  
524  
525  
526  
527  
528  
529  
530  
531  
532  
533  
534  
535  
536  
537  
538  
539  
540  
541  
542  
543  
544  
545  
546  
547  
548  
549  
550  
551  
552  
553  
554  
555  
556  
557  
558  
559  
560  
561  
562  
563  
564  
565  
566  
567  
568  
569  
570  
571  
572  
573  
574  
575  
576  
577  
578  
579  
580  
581  
582  
583  
584  
585  
586  
587  
588  
589  
590  
591  
592  
593  
594  
595  
596  
597  
598  
599  
600  
601  
602  
603  
604  
605  
606  
607  
608  
609  
610  
611  
612  
613  
614  
615  
616  
617  
618  
619  
620  
621  
622  
623  
624  
625  
626  
627  
628  
629  
630  
631  
632  
633  
634  
635  
636  
637  
638  
639  
640  
641  
642  
643  
644  
645  
646  
647  
648  
649  
650  
651  
652  
653  
654  
655  
656  
657  
658  
659  
660  
661  
662  
663  
664  
665  
666  
667  
668  
669  
670  
671  
672  
673  
674  
675  
676  
677  
678  
679  
680  
681  
682  
683  
684  
685  
686  
687  
688  
689  
690  
691  
692  
693  
694  
695  
696  
697  
698  
699  
700  
701  
702  
703  
704  
705  
706  
707  
708  
709  
710  
711  
712  
713  
714  
715  
716  
717  
718  
719  
720  
721  
722  
723  
724  
725  
726  
727  
728  
729  
730  
731  
732  
733  
734  
735  
736  
737  
738  
739  
740  
741  
742  
743  
744  
745  
746  
747  
748  
749  
750  
751  
752  
753  
754  
755  
756  
757  
758  
759  
760  
761  
762  
763  
764  
765  
766  
767  
768  
769  
770  
771  
772  
773  
774  
775  
776  
777  
778  
779  
780  
781  
782  
783  
784  
785  
786  
787  
788  
789  
790  
791  
792  
793  
794  
795  
796  
797  
798  
799  
800  
801  
802  
803  
804  
805  
806  
807  
808  
809  
810  
811  
812  
813  
814  
815  
816  
817  
818  
819  
820  
821  
822  
823  
824  
825  
826  
827  
828  
829  
830  
831  
832  
833  
834  
835  
836  
837  
838  
839  
840  
841  
842  
843  
844  
845  
846  
847  
848  
849  
850  
851  
852  
853  
854  
855  
856  
857  
858  
859  
860  
861  
862  
863  
864  
865  
866  
867  
868  
869  
870  
871  
872  
873  
874  
875  
876  
877  
878  
879  
880  
881  
882  
883  
884  
885  
886  
887  
888  
889  
890  
891  
892  
893  
894  
895  
896  
897  
898  
899  
900  
901  
902  
903  
904  
905  
906  
907  
908  
909  
910  
911  
912  
913  
914  
915  
916  
917  
918  
919  
920  
921  
922  
923  
924  
925  
926  
927  
928  
929  
930  
931  
932  
933  
934  
935  
936  
937  
938  
939  
940  
941  
942  
943  
944  
945  
946  
947  
948  
949  
950  
951  
952  
953  
954  
955  
956  
957  
958  
959  
960  
961  
962  
963  
964  
965  
966  
967  
968  
969  
970  
971  
972  
973  
974  
975  
976  
977  
978  
979  
980  
981  
982  
983  
984  
985  
986  
987  
988  
989  
990  
991  
992  
993  
994  
995  
996  
997  
998  
999  
1000

CIMT measurement were conducted by a trained sonographer using a high-resolution

1  
2  
3  
4 B-mode tomographic ultrasound system (Esaote Biomedica SpA, Genoa, Italy) with a  
5  
6 linear 7.5 MHz transducer.<sup>19</sup> The position of CIMT measurement was recorded on the  
7  
8 far wall of both right and left common carotid arteries, 1.5 cm proximal to the  
9  
10 bifurcation. CIMT was measured on-line at the end of diastole as a distance from the  
11  
12 leading edge of the first echogenic line to that of the second. These two lines represent  
13  
14 the lumen-intima interface and collagen-contained upper layer of tunic adventitia,  
15  
16 respectively. Individuals with a bilateral CIMT average greater than 0.8 mm was  
17  
18 defined as subclinical atherosclerosis, which is the highest quartile of the total  
19  
20 participants.  
21  
22  
23  
24  
25  
26  
27  
28  
29

### 30 **Statistical analyses**

31  
32 SAS version 9.4 (SAS Institute Inc, Cary, NC, USA) was used for data management  
33  
34 and statistical analysis. Continuous variables were described as means  $\pm$  standard  
35  
36 deviation (SD) or median (inter-quartile ranges), and categorical variables as numbers  
37  
38 (percentages). HOMA-IR, TG, and C-reactive protein were normalized by logarithmic  
39  
40 transformation before analysis because of skewed distribution.  
41  
42  
43  
44

45 All participants were divided into four groups according to quartiles of MUAC. The  
46  
47 quartiles of MUAC were as follows: Q1 (15.5-27.1 cm), Q2 (27.2-29.1 cm), Q3 (29.2-  
48  
49 31.2 cm) and Q4 (31.3-43.3 cm). Linear regression analysis was used to test for trend  
50  
51 across the MUAC quartiles for continuous variables and the Cochran-Armitage trend  
52  
53 chi-square test was used for categorical variables. Multivariate linear regression was  
54  
55 conducted to study the association of MUAC with a wide spectrum of cardiometabolic  
56  
57  
58  
59  
60

1  
2  
3  
4 risk factors or biomarkers. These models were also created to evaluate the association of  
5  
6 MUAC with risk of subclinical atherosclerosis in multivariate logistic regression  
7  
8 analysis. Model 1, unadjusted. Model 2, adjusted for age, sex, BMI, current smoking,  
9  
10 current drinking, physical activity, and WC. Model 3, further adjusted for C-reactive  
11  
12 protein, total cholesterol, HDL-C, LDL-C, triglycerides, fasting plasma glucose, and  
13  
14 systolic blood pressure. Stratified analysis by metabolic indicators such as age, BMI,  
15  
16 waist circumference, diabetes, insulin resistance, and hypertension were then performed  
17  
18 to verify those associations. *P* for interaction was tested by adding these metabolic  
19  
20 indicators in the multivariate adjusted logistic regression models simultaneously.  
21  
22  
23  
24  
25

26  
27 Statistical significance was set to a two-sided *P* value of less than 0.05.  
28  
29  
30  
31

### 32 **Patient and public involvement**

33  
34  
35 The study was conducted without patient and public involvement. No patients were  
36  
37 invited to take participate in the development of the research question and outcome  
38  
39 measures, the study design and the interpretation of the results. The findings from this  
40  
41 study will be disseminated to the participants after the results are published in a peer-  
42  
43 reviewed journal.  
44  
45  
46  
47  
48  
49  
50

## 51 **Results**

### 52 **Characteristics of the study participants**

53  
54  
55 The study sample consisted of 2310 (36.7%) men and 3977 (63.3%) women with an  
56  
57 average age of  $62.2 \pm 8.78$  years. Detailed sociodemographic and clinical characteristics  
58  
59  
60

1  
2  
3  
4 of the study participants according to MUAC quartiles were displayed in Table 1. As  
5  
6 expected, BMI, WC, systolic blood pressure, diastolic blood pressure, fasting plasma  
7  
8 glucose, HOMA-IR, LDL-C, triglycerides, C-reactive protein and CIMT were increased  
9  
10 with MUAC quartiles as well as the prevalence of insulin resistance, hypertension,  
11  
12 diabetes, and subclinical atherosclerosis (all  $P$  value  $< 0.05$ ). However, age and HDL-C  
13  
14 gradually decreased from the lowest quartile to the highest quartile (both  $P$  value  $<$   
15  
16  $0.0001$ ) (Table 1). Physical activity and total cholesterol were not different among the  
17  
18 quartile of MUAC.  
19  
20  
21  
22  
23  
24  
25  
26

### 27 **Association of MUAC with cardiometabolic profiles.**

28  
29 Table 2 shows the linear regression analysis of association of MUAC with  
30  
31 cardiometabolic profiles. MUAC was positively associated with BMI, WC, systolic  
32  
33 blood pressure, diastolic blood pressure, fasting plasma glucose, HOMA-IR, LDL-C,  
34  
35 triglycerides, C-reactive protein, CIMT (all  $P$  value  $< 0.01$ ), except for total cholesterol  
36  
37 ( $P$  value =  $0.30$ ). Whereas, age and HDL-C were negatively associated with MUAC (all  
38  
39  $P$  value  $< 0.01$ ). After adjustment for age, sex, BMI, current smoking, current drinking,  
40  
41 physical activity, the results did not change appreciably. Further adjusted for WC,  
42  
43 MUAC was positively associated with systolic blood pressure, HOMA\_IR and CIMT.  
44  
45  
46 The subgroup analysis showed similar results that MUAC was associated with  
47  
48 HOMA\_IR, C-reactive protein and CIMT in women after adjustment for multiple  
49  
50 confounding factors (Supplementary Table 1), but not in men (Supplementary Table 2).  
51  
52  
53  
54  
55  
56  
57  
58  
59  
60

### **Association of MUAC with risk of the cardiometabolic disorders.**

In the multivariable adjusted logistic regression model, we found that MUAC was positively and significantly associated with central obesity, diabetes, hypertension, hypertriglyceridemia and low HDL cholesterol, after adjustment for age, sex, BMI, current smoking, current drinking, physical activity (all  $P$  value  $< 0.001$ ). And each one-SD increase in MUAC (3.13 cm) was associated with a 5%, 9%, 21%, and 26% increased risk in central obesity, diabetes, hypertension, and low HDL cholesterol, respectively. Further adjustment for WC, MUAC remained positively associated with these cardiometabolic disorders (all  $P$  value  $\leq 0.03$ ), except for diabetes and hypertriglyceridemia (both  $P$  value  $> 0.05$ ). The analysis for the association of each 1-SD increase in MUAC with the metabolic disorders showed similar results. (Table 3). In addition, the association between MUAC and hypertension was more significantly in women, but not in men after adjustment for WC and other confounding (Table 3).

### **Association of MUAC with risk of subclinical atherosclerosis**

In the total study samples, each SD or quartile specific increment in MUAC was significantly associated with an increased risk of subclinical atherosclerosis after adjustment for traditional confounding factors (model 2). Moreover, these associations were not prominently attenuated when further adjustment for C-reactive protein, serum lipids, fasting plasma glucose, and systolic blood pressure. Compared with the lowest quartile of MUAC, the second, third and highest quartiles were associated with a 31% (95% CI [1.09-1.58]), 33% (95% CI [1.10-1.62]) and 45% (95% CI [1.16-1.80])

1  
2  
3  
4 increased risk of subclinical atherosclerosis, respectively, after adjustment for age, sex,  
5  
6 BMI and other confounders ( $P_{\text{for trend}} = 0.005$ ). Stratified analysis by sex revealed that  
7  
8 MUAC was positively associated with subclinical atherosclerosis in women but not in  
9  
10 men (women, OR=1.54, 95% CI [1.24-1.93] in the second quartile; 1.42 [1.11-1.83] in  
11  
12 the third quartile; 1.66 [1.26-2.20] in the highest quartile,  $P_{\text{for trend}} = 0.002$ ,  $P_{\text{for interaction}}$   
13  
14 = 0.20, Table 4).  
15  
16  
17  
18  
19  
20  
21

### 22 **Stratified analysis of the association of MUAC with subclinical atherosclerosis**

23  
24 We also examined the relationship between MUAC and subclinical atherosclerosis  
25  
26 stratified by the traditional cardiometabolic risk factors. Among women, it was found  
27  
28 that MUAC was significant and positive associated with subclinical atherosclerosis in  
29  
30 participants with age  $\geq 62$  years, BMI  $\geq 25$  kg/m<sup>2</sup> or waist circumference  $< 88$  cm  
31  
32 (Figure 1A), and those women who with diabetes, insulin resistance, or hypertension  
33  
34 (Figure 1B). Moreover, there existed significant interactions between diabetes and  
35  
36 insulin resistance with MUAC on the risk of subclinical atherosclerosis,  $P_{\text{for}}$   
37  
38 interaction=0.04 and 0.01, respectively. However, these relationships were disappeared  
39  
40 when stratified analysis were performed in men (Supplementary Figure 1).  
41  
42  
43  
44  
45  
46  
47

48 To further evaluate whether the association of MUAC with subclinical  
49  
50 atherosclerosis was influenced by BMI and waist circumference, we conducted a similar  
51  
52 multivariable logistic regression analysis in different BMI-WC categories. Among  
53  
54 women, individuals were divided into 4 groups based on their BMI and WC (the BMI  
55  
56 limits were set at  $< 25$  kg/m<sup>2</sup> and  $\geq 25$  kg/m<sup>2</sup>; the WC limits were set at  $< 88$  cm and  $\geq$   
57  
58  
59  
60

1  
2  
3  
4 88 cm). We found that MUAC increased from the lower WC subgroups to the higher  
5  
6 WC subgroups within each BMI subgroup. (Figure 2A). It was also found that MUAC  
7  
8 was independently associated with subclinical atherosclerosis in subgroup of WC < 88  
9  
10 cm independent of BMI, after adjustment of age, BMI and other confounders (OR=1.22,  
11  
12 95% CI [1.05-1.43] in the subgroup of BMI < 25 kg/m<sup>2</sup> and 1.40 [1.11-1.77] in the  
13  
14 subgroup of BMI ≥ 25 kg/m<sup>2</sup>, respectively). However, no significant association were  
15  
16 found when WC ≥ 88 cm (Figure 2B).  
17  
18  
19  
20  
21  
22  
23  
24

## 25 Discussion

26  
27 In this cross-sectional investigation including 6287 community dwelling Chinese adults,  
28  
29 we found that MUAC was significant associated with cardiometabolic disorders and  
30  
31 subclinical atherosclerosis as well, which was assessed by elevated CIMT, after  
32  
33 adjusted for the confounding factors. In sex-specific sub-analyses, the association  
34  
35 between MUAC and subclinical atherosclerosis remained significant in women, not in  
36  
37 men. The association was more prominent in those who were much older, obese, insulin  
38  
39 resistant, and have diabetes and hypertension, the status that were more likely to have  
40  
41 subclinical atherosclerosis.  
42  
43  
44  
45  
46  
47

48 MUAC was widely used for assessing obesity and malnutrition in children and  
49  
50 adolescents;<sup>20, 21</sup> several previous studies highlighted its predictive value for endings of  
51  
52 cardiovascular events in both Asian and Caucasian populations.<sup>21</sup> A retrospective  
53  
54 observational study from the National Health and Nutrition Examination Survey III  
55  
56 founding that MUAC is inversely associated with 28% lower in risk of all-cause  
57  
58  
59  
60



1  
2  
3  
4 mortality in non-obese individuals, but not in obese individuals.<sup>21</sup> Another study using  
5  
6 data from Health Effects of Arsenic Longitudinal Study (HEALS) reported that there  
7  
8 was no relationship between MUAC and CIMT.<sup>22</sup> Our study indicated that MUAC  
9  
10 increment is associated with an increased risk of cardiometabolic disorders and  
11  
12 subclinical atherosclerosis as well.  
13  
14  
15

16  
17 Possible explanations for the positive association between MUAC and  
18  
19 cardiometabolic risk are multifactorial, including change of body composition over  
20  
21 time, accumulation of upper body subcutaneous adipose, sarcopenia obesity, and race.  
22  
23 First, aging is a critical factor in changing process of metabolism and body composition.  
24  
25 Substantial fat-free mass and muscle mass reduced as the age growing, while substantial  
26  
27 visceral fat rather than subcutaneous fat increased with the growth of age, even under  
28  
29 the condition of body weight unchanged. Individuals with age > 65 suffer a reduction  
30  
31 rate over 25 percent per year for muscle mass; and this rate can be accelerated to 50  
32  
33 percent per year for those older than 80.<sup>22-24</sup> Our study indicated that MUAC levels tend  
34  
35 to decrease with aging and there exists a stronger magnitude of association between  
36  
37 MUAC and subclinical atherosclerosis in those aged  $\geq 62$  years in women. Second,  
38  
39 upper body subcutaneous adipose tissue is not only a unique fat depot but also an active  
40  
41 endocrine organ, which may confer additional risk for metabolic risk factors over  
42  
43 generalized and central adiposity.<sup>25</sup> It can release free fatty acids and is more  
44  
45 lipolytically active than lower body adipose tissue. Meanwhile, free fatty acids are  
46  
47 directly related with hepatic very low-density lipoprotein production, insulin resistance  
48  
49 and endothelial dysfunction, thus lead to cardiovascular and metabolic consequences.<sup>26</sup>  
50  
51  
52  
53  
54  
55  
56  
57  
58  
59  
60

1  
2  
3  
4 Third, sarcopenia obesity is also a critical factor. Sarcopenia obesity is a phenomenon  
5  
6 that muscle mass is gradually decreased with age, even if body fat mass or body weight  
7  
8 is unchanged or slightly increased. It continually occurred in the elderly as well as  
9  
10 young or middle-aged adults with chronic disease.<sup>27,28</sup> It is widely held that sarcopenia  
11  
12 obesity is a well-correlated risk factor for hypertension.<sup>29</sup> Subjects with this phenotype  
13  
14 may be more inclined to develop metabolic and CVD than subjects with the opposite  
15  
16 phenotype.<sup>27-28</sup> A study has shown that decreased muscle mass in lower extremity may  
17  
18 result in atherosclerosis; while increased muscle mass through weight training may  
19  
20 reduce the risk of atherosclerosis and CVD.<sup>29</sup> Furthermore, the decrease of muscle mass  
21  
22 will not only result in reduction in muscle strength but also a strong impact on  
23  
24 metabolism.<sup>22</sup> Finally, compared with Caucasians, the East Asians tend to have a higher  
25  
26 percentage of body fat, a weaker willingness on body build, and less muscle mass as  
27  
28 well as connective tissue.  
29  
30  
31  
32  
33  
34  
35  
36

37  
38 MUAC was associated with subclinical atherosclerosis in a sex-specific manner. One  
39  
40 plausible explanation for the sex difference in MUAC-subclinical atherosclerosis  
41  
42 relationship is biological differences between men and women, such as hormones effect,  
43  
44 immune system responses, muscle capacity and physical function. For instance, men  
45  
46 tend to have greater muscle capacity and higher muscle mass than their women  
47  
48 counterparts due to higher levels of testosterone.<sup>21</sup>  
49  
50  
51  
52

53  
54 The strength of the current study was evidenced by a well-defined community setting,  
55  
56 fair sized sample volume, and desirable population homogeneity. We comprehensively  
57  
58 determine the association of MUAC with a wide spectrum of cardiometabolic risk  
59  
60

1  
2  
3  
4 profile including subclinical atherosclerosis. However, we acknowledge the following  
5  
6 limitations in our study. Firstly, the cross-sectional nature of present study means no  
7  
8 causal inference can be drawn. Further prospective study is needed to investigate the  
9  
10 efficacy of MUAC in predicting atherosclerosis and CVDs. Secondly, although our  
11  
12 finding supported that it can be a reliable surrogate of upper body adiposity, MUAC is a  
13  
14 measure comprised of both adipose and lean tissue rather than a direct indicator for  
15  
16 adiposity. Thirdly, as body composition changes over time, the narrow range of age for  
17  
18 the participants enrolled could affected the outcome. Lastly, since our study was  
19  
20 performed in a Chinese population, it should be cautiously to generalize the results to  
21  
22 the other ethnicities.  
23  
24  
25  
26  
27  
28  
29

30 In conclusion, our study provides evidence of a positive association of MUAC with  
31  
32 cardiometabolic risk and subclinical atherosclerosis. Given the accelerating rise rate of  
33  
34 atherosclerosis in China, MUAC might act as a valuable indicator for early prevention  
35  
36 of CVD.  
37  
38  
39  
40  
41  
42  
43  
44  
45  
46  
47  
48  
49  
50  
51  
52  
53  
54  
55  
56  
57  
58  
59  
60

## Acknowledgments

We thank all the study participants for their participation and contribution. The present study would not have been possible without the participation of the participants.

## Footnotes

**Contributors:** All authors had full access to all of the data in the study and take responsibility for the integrity of the data and the accuracy of the data analysis. Study concept and design: TW, MX, YB and WW. Acquisition of data: YH, XJ, LX, WZ, CD, LW, ZZ, ML, JL, YX, and YC. Analysis and interpretation of data: YH, TW, MX, YB and WW. Drafting of the manuscript: YH. Critical revision of the manuscript: TW, MX, YB and WW. Statistical analysis: YH and XJ.

**Funding:** This work was supported by grants from the National Natural Science Foundation of China (81770842, 81500660 and 81561128019), the Ministry of Science and Technology of China (2018YFC1311705, 2016YFC1305600 and 2016YFC1304904), the Shanghai Science and Technology Commission (YDZX20173100004881) and the Shanghai Shen-Kang Hospital Development Center (SHDC12016202).

**Competing interests:** None declared.

**Provenance and peer review:** Not commissioned; externally peer reviewed.

**Data sharing statement:** No additional data available.

## References

1. Hertle E, Stehouwer CD, Van Greevenbroek MM. The complement system in human cardiometabolic disease. *Mol Immunol.* 2014; 61: 135-48.
2. Kaur J. A comprehensive review on metabolic syndrome. *Cardiol Res Pract* 2014; 2014: 943162.
3. WHO (2015) Cardiovascular diseases (CVDs). Available from [www.who.int/mediacentre/factsheets/fs317/en/index.html](http://www.who.int/mediacentre/factsheets/fs317/en/index.html). Accessed 15 May 2016.
4. Leal J, Luengo-Fernández R, Gray A, et al. Economic burden of cardiovascular diseases in the enlarged European Union. *Eur Heart J* 2006; 27:1610–1619.
5. Mozaffarian D, Benjamin EJ, Go AS, et al. Heart disease and stroke statistics-2015 update: A report from the American Heart Association. *Circulation* 2015; 131: e29-e322.
6. Mao Z, Wu F, Shan Y. Identification of key gens and miRNAs associated with carotid atherosclerosis based on mRNA-seq data. *Medicine* 2018; 97: e9832.
7. Fernández-Friera L, Peñalvo JL, Fernández-Ortiz A, et al. Prevalence, Vascular Distribution, and Multiterritorial Extent of Subclinical Atherosclerosis in a Middle-Aged Cohort: The PESA (Progression of Early Subclinical Atherosclerosis) Study. *Circulation* 2015; 131: 2104-2113.
8. Lorenz MW, Markus HS, Bots ML, et al. Prediction of clinical cardiovascular events with carotid intima-media thickness: a systematic review and meta-analysis. *Circulation* 2007; 115: 459-467.
9. Fox CS, Massaro JM, Hoffmann U, et al. Abdominal visceral and subcutaneous

- 1  
2  
3  
4 adipose tissue compartments: association with metabolic risk factors in the  
5  
6 Framingham Heart Study. *Circulation* 2007; 116: 39-48.  
7  
8  
9 10. Nielsen S, Guo Z, Johnson CM, et al. Splanchnic lipolysis in human obesity. *J Clin*  
10  
11 *Invest* 2004; 113:1582-1588.  
12  
13  
14 11. Ho SC, Wang JY, Kuo HP, et al. Mid-arm and calf circumferences are stronger  
15  
16 mortality predictors than body mass index for patients with chronic obstructive  
17  
18 pulmonary disease. *Int J Chron Obstruct Pulmon Dis* 2016; 11: 2075-2080.  
19  
20  
21 12. Bates CJ1, Hamer M, Mishra GD. A study of relationships between bone-related  
22  
23 vitamins and minerals, related risk markers, and subsequent mortality in older  
24  
25 British people: the National Diet and Nutrition Survey of People Aged 65 Years  
26  
27 and Over. *Osteoporos Int* 2012; 23: 457-466.  
28  
29  
30 13. Huang Y, Bi Y, Xu M, et al. Nonalcoholic fatty liver disease is associated with  
31  
32 atherosclerosis in middle-aged and elderly Chinese. *Arterioscler Thromb Vasc Biol*  
33  
34 2012; 32: 2321-2326.  
35  
36  
37 14. Chen Y, Xu M, Wang T, et al. Advanced fibrosis associates with atherosclerosis in  
38  
39 subjects with nonalcoholic fatty liver disease. *Atherosclerosis* 2015; 241: 145-150.  
40  
41  
42 15. Gul Sagun, Aytekin Oguz, Engin Karagoz, et al. Application of alternative  
43  
44 anthropometric measurements to predict metabolic syndrome. *Clinics* 2014; 69:  
45  
46 347-353.  
47  
48  
49 16. Diagnosis and classification of diabetes mellitus. *Diabetes Care* 2014; 37 (Suppl 1):  
50  
51 S81-90.  
52  
53  
54 17. Wang T, Xu M, Xu Y, et al. Association of Bisphenol A exposure with hypertension  
55  
56  
57  
58  
59  
60

- 1  
2  
3  
4 and early macrovascular disease in Chinese Adults. *Medicine (Baltimore)* 2015; 94:  
5  
6 e1814.  
7  
8
- 9 18. (IPAQ)., G. f. d. p. a. a. o. t. I. P. A. Q. <http://www.ipaq.ki.se/scoring.pdf>.  
10  
11
- 12 19. Chen Y, Xu M, Wang T, et al. Advanced fibrosis associates with atherosclerosis in  
13  
14 subjects with nonalcoholic fatty liver disease. *Atherosclerosis* 2015; 241:145-150.  
15  
16
- 17 20. Ogden CL, Carroll MD, Curtin LR, et al. Prevalence of overweight and obesity in  
18  
19 the United States, 1999–2004. *JAMA* 2006; 295: 1549-55.  
20  
21
- 22 21. Wu LW, Lin YY, Kao TW, et al. Mid-Arm Circumference and All Cause,  
23  
24 Cardiovascular, and Cancer Mortality among Obese and Non-Obese US Adults: the  
25  
26 National Health and Nutrition Examination Survey III. *Sci Rep* 2017; 7: 2302.  
27  
28
- 29 22. Tom SE, Cooper R, Patel KV, Guralnik JM. Menopausal characteristics and  
30  
31 physical functioning in older adulthood in the NHANES III. *Menopause (New*  
32  
33 *York, NY)* 2012; 19: 283.  
34  
35
- 36 23. WORKHD. Menopause &The Benefits of Exercise. Month 2016.  
37  
38
- 39 24. Neff LM, Hoffmann ME, Zeiss DM, et al. Core body temperature is lower in  
40  
41 postmenopausal female than premenopausal female: potential implications for  
42  
43 energy metabolism and midlife weight gain. *Cardiovasc Endocrinol* 2016; 5: 151-  
44  
45 154.  
46  
47
- 48 25. Luo Y, Ma X, Shen Y, et al. Neck circumference as an effective measure for  
49  
50 identifying cardiometabolic syndrome: a comparison with waist circumference.  
51  
52  
53  
54  
55  
56  
57  
58  
59  
60
- Endocrine 2017; 55: 822-830.
26. Fitch KV1, Stanley TL, Looby SE, et al. Relationship Between Neck Circumference

1  
2  
3  
4 and Cardiometabolic Parameters in HIV-Infected and Non-HIV-Infected Adults.

5  
6 Diabetes Care 2011; 34: 1026–1031.

7  
8  
9 27. Dominguez LJ, Barbagallo M. The cardiometabolic syndrome and sarcopenic  
10  
11 obesity in older persons. J Cardiometab Syndr 2007; 2: 183–189.

12  
13  
14 28. Stephen WC, Janssen I. Sarcopenic obesity and cardiovascular disease risk in the  
15  
16 elderly. J Nutr Health Aging 2009; 13: 460-466.

17  
18  
19 29. Park SH, Park JH, Song PS, et al. Sarcopenic obesity as an independent risk factor  
20  
21 of hypertension. Journal of the American Society of Hypertension 2013; 7: 420-425.  
22  
23  
24  
25  
26  
27  
28  
29  
30  
31  
32  
33  
34  
35  
36  
37  
38  
39  
40  
41  
42  
43  
44  
45  
46  
47  
48  
49  
50  
51  
52  
53  
54  
55  
56  
57  
58  
59  
60



## Figure legends

**Figure 1.** Stratified analysis of the association of mid-upper arm circumference with risk of subclinical atherosclerosis in women. A: All subjects were divided into subgroups based on their average age (age < 62 years, age  $\geq$  62 years), body mass index (BMI < 25 kg/m<sup>2</sup>, BMI  $\geq$  25 kg/m<sup>2</sup>), or waist circumference (WC < 88 cm or WC  $\geq$  88 cm). B: All subjects were divided into subgroups based on diabetes (yes or no), insulin resistance (yes or no), or hypertension (yes or no). Data were presented as odds ratio (OR) and 95% confidence interval (CI). *P* values were calculated from multivariable logistic regression analysis. Adjusted for age (years), body mass index (kg/m<sup>2</sup>), current smoking (yes or no), current drinking (yes or no), physical activity (MET-h/wk), waist circumference (cm), C-reactive protein (mg/L), total cholesterol (mmol/L), HDL-C (mmol/L), LDL-C (mmol/L), triglycerides (mmol/L), fasting plasma glucose (mmol/L), and systolic blood pressure (mmHg).

**Figure 2.** A: MUAC in the BMI and WC subgroups in women. B: Association of MUAC with risk of subclinical atherosclerosis in the BMI and WC subgroups in women. MUAC: mid-upper arm circumference, BMI: body mass index, WC: waist circumference. Adjusted for age (years), body mass index (kg/m<sup>2</sup>), current smoking (yes or no), current drinking (yes or no), physical activity (MET-h/wk), waist circumference (cm), C-reactive protein (mg/L), total cholesterol (mmol/L), HDL-C (mmol/L), LDL-C (mmol/L), triglycerides (mmol/L), fasting plasma glucose (mmol/L), and systolic blood pressure (mmHg).

**Table 1. Characteristics of study participants according to quartiles of mid-upper arm circumference in total samples**

|                                      | Mid-upper arm circumference, cm |                           |                           |                           | <i>P</i> for trend |
|--------------------------------------|---------------------------------|---------------------------|---------------------------|---------------------------|--------------------|
|                                      | Quartile 1<br>(15.5-27.1)       | Quartile 2<br>(27.2-29.1) | Quartile 3<br>(29.2-31.2) | Quartile 4<br>(31.3-43.3) |                    |
| n                                    | 1510                            | 1570                      | 1582                      | 1625                      |                    |
| Age (years)                          | 63.4 (9.2)                      | 62.2 (8.8)                | 61.7 (8.6)                | 61.6 (8.4)                | < 0.0001           |
| Female, n (%)                        | 1110 (27.9)                     | 1048 (26.4)               | 922 (23.2)                | 897 (22.6)                |                    |
| Body mass index (kg/m <sup>2</sup> ) | 22.3 (2.8)                      | 24.2 (3.8)                | 25.5 (3.2)                | 27.9 (7.5)                | < 0.0001           |
| Waist circumference (cm)             | 75.6 (8.5)                      | 81.4 (7.9)                | 85.5 (8.3)                | 91.6 (9.2)                | < 0.0001           |
| Systolic blood pressure (mmHg)       | 132.6 (18.0)                    | 133.4 (17.3)              | 136.0 (17.2)              | 137.0 (16.4)              | < 0.0001           |
| Diastolic blood pressure (mmHg)      | 74.2 (9.5)                      | 75.7 (9.3)                | 77.2 (9.2)                | 78.0 (9.8)                | < 0.0001           |
| Current smoking, n (%)               | 196 (13.0)                      | 279 (17.8)                | 346 (21.9)                | 393 (24.2)                | < 0.0001           |
| Current drinking, n (%)              | 151 (10)                        | 195 (12.4)                | 256 (16.2)                | 290 (17.9)                | < 0.0001           |
| Physical activity (MET-h/wk)         | 21.0 (6.0-21.0)                 | 15.3 (3.0-21.0)           | 15.0 (3.0-21.0)           | 15.0 (3.0-21.0)           | 0.30               |
| Fasting plasma glucose (mmol/L)      | 5.99 (1.36)                     | 6.06 (1.34)               | 6.21 (1.57)               | 6.28 (1.61)               | < 0.0001           |
| HOMA-IR                              | 1.42 (0.99-2.15)                | 1.75 (1.20-2.57)          | 1.95 (1.35-2.86)          | 2.43 (1.69-3.55)          | < 0.0001           |
| Total cholesterol (mmol/L)           | 5.28 (0.95)                     | 5.31 (0.98)               | 5.26 (1.04)               | 5.24 (1.08)               | 0.20               |
| LDL-C (mmol/L)                       | 3.56 (0.75)                     | 3.62 (0.77)               | 3.62 (0.83)               | 3.63 (0.81)               | 0.02               |
| HDL-C (mmol/L)                       | 1.42 (0.33)                     | 1.35 (0.29)               | 1.31 (0.29)               | 1.27 (0.27)               | < 0.0001           |
| Triglycerides (mmol/L)               | 1.33 (0.98-1.84)                | 1.49 (1.07-2.12)          | 1.58 (1.12-2.25)          | 1.66 (1.19-2.30)          | < 0.0001           |
| C-reactive protein (mg/L)            | 0.19 (0.14-0.28)                | 0.21 (0.16-0.31)          | 0.23(0.17-0.35)           | 0.25(0.18-0.39)           | < 0.0001           |
| CIMT (mm)                            | 0.69 (0.16)                     | 0.70 (0.15)               | 0.70 (0.14)               | 0.72 (0.14)               | < 0.0001           |
| Insulin resistance, n (%)            | 203 (13.5)                      | 313 (20.0)                | 410 (26.0)                | 655 (40.5)                | < 0.0001           |

1  
2  
3  
4  
5  
6  
7  
8  
9  
10  
11  
12  
13  
14  
15  
16  
17  
18  
19  
20  
21  
22  
23  
24  
25  
26  
27  
28  
29  
30  
31  
32  
33  
34  
35  
36  
37  
38  
39  
40  
41  
42  
43  
44  
45  
46

|                                    |            |            |            |             |          |
|------------------------------------|------------|------------|------------|-------------|----------|
| Hypertension, n (%)                | 747 (49.5) | 862 (52.7) | 978 (61.9) | 1108 (68.3) | < 0.0001 |
| Diabetes, n (%)                    | 368 (24.7) | 403 (25.9) | 457 (29.2) | 533 (33.2)  | < 0.0001 |
| Subclinical atherosclerosis, n (%) | 472 (31.3) | 541 (34.5) | 555 (35.1) | 590 (36.3)  | 0.0035   |

Data are presented as means ± standard deviation (SD), or medians (inter-quartile ranges) for skewed variables, or number (proportions) for categorical variables.

*P* values were calculated from one-way analysis of variance (ANOVA) for continuous variables and chi-square test for categorical variables.

Subclinical atherosclerosis was defined as CIMT ≥ 0.8 mm, which is the cut-off point for the highest quartile of the total participants.

Insulin resistance was defined as HOMA-IR ≥ 2.8, which is the cut-off point for the highest quartile of the total participants.

Abbreviations: MET, metabolic equivalent task; LDL-C, low-density lipoprotein cholesterol; HDL-C, high-density lipoprotein cholesterol; CIMT, carotid intima-media thickness; HOMA-IR indicates homeostasis model assessment of insulin resistance.

**Table 2. The association of mid-upper arm circumference with cardiometabolic profiles in total samples**

|                                      | Model 1            |         | Model 2           |         | Model 3            |         |
|--------------------------------------|--------------------|---------|-------------------|---------|--------------------|---------|
|                                      | $\beta \pm SE$     | P value | $\beta \pm SE$    | P value | $\beta \pm SE$     | P value |
| Age (years)                          | -0.20 $\pm$ 0.04   | <0.0001 | /                 | /       | /                  | /       |
| Body mass index (kg/m <sup>2</sup> ) | 0.70 $\pm$ 0.02    | <0.0001 | /                 | /       | /                  | /       |
| Waist circumference (cm)             | 1.94 $\pm$ 0.03    | <0.0001 | 1.62 $\pm$ 0.04   | <0.0001 | /                  | /       |
| Systolic blood pressure (mmHg)       | 0.55 $\pm$ 0.07    | <0.0001 | 0.49 $\pm$ 0.09   | <0.0001 | 0.20 $\pm$ 0.10    | 0.04    |
| Diastolic blood pressure (mmHg)      | 0.49 $\pm$ 0.04    | <0.0001 | 0.32 $\pm$ 0.05   | <0.0001 | 0.08 $\pm$ 0.06    | 0.15    |
| Fasting plasma glucose (mmol/L)      | 0.03 $\pm$ 0.01    | <0.0001 | 0.02 $\pm$ 0.01   | 0.01    | -0.02 $\pm$ 0.01   | 0.04    |
| HOMA-IR                              | 0.03 $\pm$ 0.001   | <0.0001 | 0.02 $\pm$ 0.001  | <0.0001 | 0.01 $\pm$ 0.002   | 0.0003  |
| Total cholesterol (mmol/L)           | -0.004 $\pm$ 0.004 | 0.30    | 0.004 $\pm$ 0.005 | 0.48    | -0.01 $\pm$ 0.01   | 0.24    |
| LDL-C (mmol/L)                       | 0.009 $\pm$ 0.003  | 0.005   | 0.01 $\pm$ 0.004  | 0.001   | 0.001 $\pm$ 0.005  | 0.79    |
| HDL-C (mmol/L)                       | -0.02 $\pm$ 0.001  | <0.0001 | -0.01 $\pm$ 0.001 | <0.0001 | -0.003 $\pm$ 0.002 | 0.08    |
| Triglycerides (mmol/L)               | 0.01 $\pm$ 0.001   | <0.0001 | 0.01 $\pm$ 0.001  | <0.0001 | 0.001 $\pm$ 0.001  | 0.38    |
| C-reactive protein (mg/L)            | 0.01 $\pm$ 0.001   | <0.0001 | 0.01 $\pm$ 0.001  | <0.0001 | 0.002 $\pm$ 0.002  | 0.12    |
| CIMT (cm)                            | 0.003 $\pm$ 0.001  | <0.0001 | 0.003 $\pm$ 0.001 | 0.0002  | 0.002 $\pm$ 0.001  | 0.005   |

Data are linear regression estimates  $\pm$  standard error ( $\beta \pm SE$ ).

P values were calculated from multivariable linear regression model.

Model 1: unadjusted;

Model 2: adjusted for age (years), sex, body mass index (kg/m<sup>2</sup>), current smoking (yes or no), current drinking (yes or no), physical activity (MET-h/wk);

1  
2  
3  
4  
5  
6  
7  
8  
9  
10  
11  
12  
13  
14  
15  
16  
17  
18  
19  
20  
21  
22  
23  
24  
25  
26  
27  
28  
29  
30  
31  
32  
33  
34  
35  
36  
37  
38  
39  
40  
41  
42  
43  
44  
45  
46

Model 3: further adjusted for waist circumference (cm).

Abbreviations: LDL-C, low-density lipoprotein cholesterol; HDL-C, high-density lipoprotein cholesterol; CIMT, carotid intima-media thickness.

For peer review only

**Table 3. Logistic regression analysis of risk of cardiometabolic disorders in relation to mid-upper arm circumference in total and sex-specific samples**

|                      |         | OR (95% CI) |                  |                  |                  |                  | P for trend |
|----------------------|---------|-------------|------------------|------------------|------------------|------------------|-------------|
|                      |         | Quartile 1  | Quartile 2       | Quartile 3       | Quartile 4       | 1-SD (3.13 cm)   |             |
| <b>Total cohort</b>  |         |             |                  |                  |                  |                  |             |
| Central obesity      | Model 1 | 1.00        | 1.43 (0.99-2.05) | 3.44 (2.45-4.82) | 7.25 (5.12-10.3) | 2.05 (1.85-2.28) | < 0.0001    |
|                      | Model 2 | 1.00        | 1.43 (0.99-2.05) | 3.44 (2.45-4.82) | 7.25 (5.12-10.3) | 2.05 (1.85-2.28) | < 0.0001    |
| Diabetes             | Model 1 | 1.00        | 1.00 (0.82-1.21) | 1.13 (0.93-1.37) | 1.26 (1.02-1.55) | 1.09 (1.02-1.16) | 0.02        |
|                      | Model 2 | 1.00        | 0.87 (0.73-1.06) | 0.89 (0.73-1.10) | 0.87 (0.70-1.09) | 0.96 (0.90-1.04) | 0.33        |
| Hypertension         | Model 1 | 1.00        | 1.04 (0.87-1.24) | 1.57 (1.30-1.89) | 1.65 (1.34-2.04) | 1.21 (1.14-1.30) | < 0.0001    |
|                      | Model 2 | 1.00        | 0.92 (0.77-1.10) | 1.29 (1.06-1.56) | 1.23 (0.98-1.53) | 1.10 (1.03-1.19) | 0.006       |
| Hypertriglyceridemia | Model 1 | 1.00        | 1.55 (1.25-1.92) | 1.78 (1.43-2.21) | 1.92 (1.53-2.41) | 1.24 (1.15-1.35) | < 0.0001    |
|                      | Model 2 | 1.00        | 1.31 (1.05-1.63) | 1.32 (1.05-1.66) | 1.19 (0.93-1.54) | 1.03 (0.94-1.13) | 0.28        |
| Low HDL cholesterol  | Model 1 | 1.00        | 1.40 (1.06-1.84) | 1.80 (1.38-2.35) | 2.06 (1.57-2.69) | 1.26 (1.16-1.37) | < 0.0001    |
|                      | Model 2 | 1.00        | 1.21 (0.91-1.60) | 1.41 (1.06-1.86) | 1.38 (1.02-1.88) | 1.10 (1.01-1.22) | 0.03        |
| <b>Women</b>         |         |             |                  |                  |                  |                  |             |
| Central obesity      | Model 1 | 1.00        | 1.49 (1.04-2.15) | 3.54 (2.50-4.99) | 7.10 (4.97-10.2) | 2.01 (1.81-2.25) | < 0.0001    |
|                      | Model 2 | 1.00        | 1.49 (1.04-2.15) | 3.54 (2.50-4.99) | 7.10 (4.97-10.2) | 2.01 (1.81-2.25) | < 0.0001    |
| Diabetes             | Model 1 | 1.00        | 1.11 (0.89-1.41) | 1.29 (1.01-1.65) | 1.39 (1.07-1.80) | 1.12 (1.03-1.22) | 0.007       |
|                      | Model 2 | 1.00        | 0.98 (0.77-1.24) | 1.03 (0.80-1.32) | 0.97 (0.73-1.29) | 0.99 (0.91-1.09) | 0.93        |
| Hypertension         | Model 1 | 1.00        | 1.10 (0.89-1.35) | 1.93 (1.54-2.44) | 1.80 (1.39-2.33) | 1.27 (1.17-1.38) | < 0.0001    |
|                      | Model 2 | 1.00        | 0.96 (0.78-1.18) | 1.55 (1.23-1.97) | 1.29 (0.98-1.68) | 1.14 (1.05-1.24) | 0.003       |

1  
2  
3  
4  
5  
6  
7  
8  
9  
10  
11  
12  
13  
14  
15  
16  
17  
18  
19  
20  
21  
22  
23  
24  
25  
26  
27  
28  
29  
30  
31  
32  
33  
34  
35  
36  
37  
38  
39  
40  
41  
42  
43  
44  
45  
46

|                      |         |      |                  |                  |                  |                  |          |
|----------------------|---------|------|------------------|------------------|------------------|------------------|----------|
| Hypertriglyceridemia | Model 1 | 1.00 | 1.63 (1.28-2.01) | 1.89 (1.48-2.42) | 1.84 (1.42-2.38) | 1.25 (1.15-1.37) | < 0.0001 |
|                      | Model 2 | 1.00 | 1.38 (1.08-1.78) | 1.43 (1.09-1.86) | 1.17 (0.87-1.58) | 1.05 (0.94-1.17) | 0.33     |
| Low HDL cholesterol  | Model 1 | 1.00 | 1.67 (1.17-2.38) | 1.94 (1.36-2.77) | 1.87 (1.29-2.71) | 1.21 (1.09-1.35) | 0.0007   |
|                      | Model 2 | 1.00 | 1.47 (1.03-2.21) | 1.56 (1.07-2.28) | 1.32 (0.86-2.01) | 1.08 (0.91-1.23) | 0.23     |
| <b>Men</b>           |         |      |                  |                  |                  |                  |          |
| Central obesity      | Model 1 | 1.00 | 0.38 (0.02-6.61) | 3.99 (0.49-32.0) | 10.4 (1.33-81.2) | 3.08 (1.92-4.95) | < 0.0001 |
|                      | Model 2 | 1.00 | 0.38 (0.02-6.61) | 3.99 (0.49-32.0) | 10.4 (1.33-81.2) | 3.08 (1.92-4.95) | < 0.0001 |
| Diabetes             | Model 1 | 1.00 | 0.79 (0.56-1.10) | 0.85 (0.61-1.18) | 0.97 (0.68-1.38) | 1.01 (0.90-1.13) | 0.84     |
|                      | Model 2 | 1.00 | 0.69 (0.49-0.98) | 0.68 (0.48-0.97) | 0.69 (0.47-1.01) | 0.91 (0.81-1.03) | 0.12     |
| Hypertension         | Model 1 | 1.00 | 0.92 (0.66-1.29) | 1.06 (0.76-1.48) | 1.29 (0.89-1.88) | 1.10 (0.98-1.24) | 0.10     |
|                      | Model 2 | 1.00 | 0.84 (0.60-1.17) | 0.91 (0.65-1.28) | 1.03 (0.70-1.52) | 1.03 (0.91-1.16) | 0.68     |
| Hypertriglyceridemia | Model 1 | 1.00 | 1.37 (0.85-2.21) | 1.46 (0.92-2.31) | 1.66 (1.03-2.67) | 1.13 (0.96-1.32) | 0.04     |
|                      | Model 2 | 1.00 | 1.19 (0.73-1.92) | 1.15 (0.72-1.84) | 1.13 (0.68-1.87) | 0.97 (0.81-1.52) | 0.81     |
| Low HDL cholesterol  | Model 1 | 1.00 | 1.01 (0.65-1.58) | 1.42 (0.94-2.16) | 1.62 (1.04-2.51) | 1.21 (1.06-1.38) | 0.006    |
|                      | Model 2 | 1.00 | 0.92 (0.59-1.44) | 1.22 (0.79-1.86) | 1.27 (0.80-2.01) | 1.12 (0.97-1.29) | 0.13     |

Data were presented as odds ratio (OR) and 95% confidence interval (CI).

*P* values were calculated from multivariable logistic regression analysis in quartile of mid-upper arm circumference.

Model 1: adjusted for age (years), sex, body mass index (kg/m<sup>2</sup>), current smoking (yes or no), current drinking (yes or no), physical activity (MET-h/wk);

Model 2: further adjusted for waist circumference (cm), except for central obesity.

**Table 4. The association of mid-upper arm circumference with subclinical atherosclerosis in total and sex-specific samples**

|                     | OR (95% CI) |                  |                  |                  |                  | <i>P</i> for trend |
|---------------------|-------------|------------------|------------------|------------------|------------------|--------------------|
|                     | Quartile 1  | Quartile 2       | Quartile 3       | Quartile 4       | 1-SD (3.13 cm)   |                    |
| <b>Total cohort</b> |             |                  |                  |                  |                  | 0.20*              |
| Cases/Participants  | 472 / 1510  | 541 / 1570       | 555 / 1582       | 590 / 1625       | 2158 / 6287      |                    |
| Model 1             | 1.00        | 1.16 (1.00-1.34) | 1.19 (1.02-1.38) | 1.25 (1.08-1.45) | 1.06 (1.01-1.12) | 0.004              |
| Model 2             | 1.00        | 1.30 (1.08-1.56) | 1.30 (1.07-1.58) | 1.35 (1.09-1.67) | 1.06 (0.98-1.15) | 0.013              |
| Model 3             | 1.00        | 1.31 (1.09-1.58) | 1.33 (1.10-1.62) | 1.45 (1.16-1.80) | 1.08 (0.99-1.17) | 0.005              |
| <b>Women</b>        |             |                  |                  |                  |                  |                    |
| Case/participants   | 287 / 1110  | 327 / 1048       | 275 / 922        | 282 / 897        | 1171 / 3977      |                    |
| Model 1             | 1.00        | 1.30 (1.08-1.57) | 1.22 (1.00-1.48) | 1.32 (1.09-1.60) | 1.07 (1.00-1.14) | 0.014              |
| Model 2             | 1.00        | 1.54 (1.24-1.93) | 1.43 (1.18-1.82) | 1.53 (1.17-2.02) | 1.11 (1.01-1.23) | 0.007              |
| Model 3             | 1.00        | 1.54 (1.24-1.93) | 1.42 (1.11-1.83) | 1.66 (1.26-2.20) | 1.14 (1.03-1.26) | 0.002              |
| <b>Men</b>          |             |                  |                  |                  |                  |                    |
| Case/participants   | 185 / 400   | 214 / 522        | 280 / 660        | 308 / 728        | 987 / 2310       |                    |
| Model 1             | 1.00        | 0.81 (0.62-1.05) | 0.86 (0.67-1.10) | 0.85 (0.67-1.09) | 0.93 (0.85-1.02) | 0.39               |
| Model 2             | 1.00        | 0.89 (0.64-1.23) | 1.04 (0.75-1.44) | 1.00 (0.70-1.45) | 0.97 (0.85-1.11) | 0.71               |
| Model 3             | 1.00        | 0.90 (0.65-1.25) | 1.06 (0.76-1.48) | 1.05 (0.72-1.52) | 0.99 (0.86-1.06) | 0.54               |

Data were presented as odds ratio (OR) and 95% confidence interval (CI).

*P* values were calculated from multivariable logistic regression analysis.

\*: the interaction of MUAC with sex on subclinical atherosclerosis.

Model 1, unadjusted;



1  
2  
3  
4  
5 Model 2, adjusted for age (years), sex, body mass index (kg/m<sup>2</sup>), current smoking (yes or no), current drinking (yes or no), physical activity (MET-h/wk),  
6 waist circumference (cm);

7  
8 Model 3, further adjusted for C-reactive protein (mg/L), total cholesterol (mmol/L), HDL-C (mmol/L), LDL-C (mmol/L), triglycerides (mmol/L), fasting  
9 plasma glucose (mmol/L), and systolic blood pressure (mmHg).  
10  
11  
12  
13  
14  
15  
16  
17  
18  
19  
20  
21  
22  
23  
24  
25  
26  
27  
28  
29  
30  
31  
32  
33  
34  
35  
36  
37  
38  
39  
40  
41  
42  
43  
44  
45  
46

For peer review only

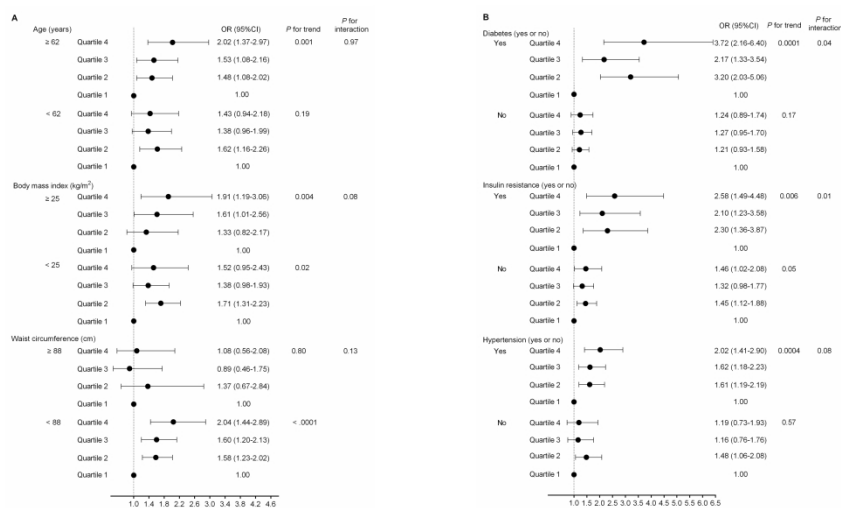

Figure 1

338x190mm (300 x 300 DPI)

1  
2  
3  
4  
5  
6  
7  
8  
9  
10  
11  
12  
13  
14  
15  
16  
17  
18  
19  
20  
21  
22  
23  
24  
25  
26  
27  
28  
29  
30  
31  
32  
33  
34  
35  
36  
37  
38  
39  
40  
41  
42  
43  
44  
45  
46  
47  
48  
49  
50  
51  
52  
53  
54  
55  
56  
57  
58  
59  
60

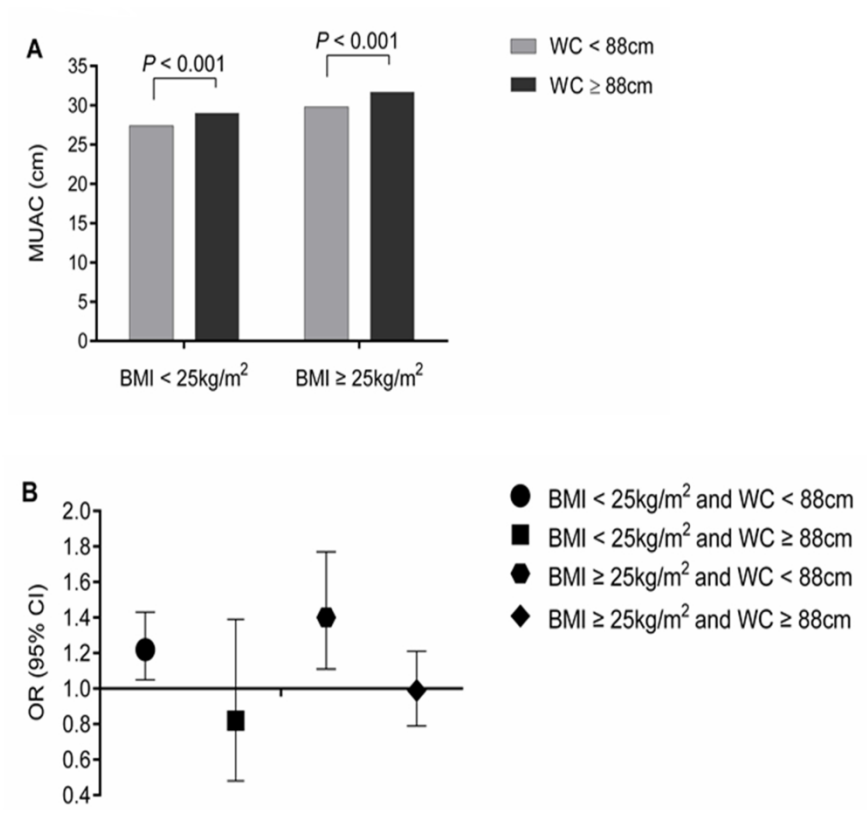

Figure 2

199x176mm (300 x 300 DPI)

1  
2  
3  
4 **Supplemental Information**  
5

6 **The mid-upper arm circumference is associated with an increased cardiometabolic risk**  
7  
8  
9 **in middle aged and elderly Chinese population**  
10  
11  
12  
13  
14  
15  
16  
17  
18  
19  
20  
21  
22  
23  
24  
25  
26  
27  
28  
29  
30  
31  
32  
33  
34  
35  
36  
37  
38  
39  
40  
41  
42  
43  
44  
45  
46  
47  
48  
49  
50  
51  
52  
53  
54  
55  
56  
57  
58  
59  
60

For peer review only

1  
2  
3  
4 **Supplemental Table 1.** The association of mid-upper arm circumference with  
5 cardiometabolic profiles in women  
6

7 **Supplemental Table 2.** The association of mid-upper arm circumference with  
8 cardiometabolic profiles in men  
9  
10

### 11 12 13 **Supplemental Figure Legend**

14  
15 **Supplemental Figure 1.** Stratified analysis of the association of mid-upper arm circumference  
16 with risk of subclinical atherosclerosis in men. A: All subjects were divided into subgroups  
17 based on their average age (age < 62 years, age ≥ 62 years), body mass index (BMI < 25 kg/m<sup>2</sup>,  
18 BMI ≥ 25 kg/m<sup>2</sup>), or waist circumference (WC < 88 cm or WC ≥ 88 cm). B: All subjects were  
19 divided into subgroups based on diabetes (yes or no), insulin resistance (yes or no), or  
20 hypertension (yes or no). Data were presented as odds ratio (OR) and 95% confidence interval  
21 (CI). *P* values were calculated from multivariable logistic regression analysis. Adjusted for age  
22 (years), body mass index (kg/m<sup>2</sup>), current smoking (yes or no), current drinking (yes or no),  
23 physical activity (MET-h/wk), waist circumference (cm), C-reactive protein (mg/L), total  
24 cholesterol (mmol/L), HDL-C (mmol/L), LDL-C (mmol/L), triglycerides (mmol/L), fasting  
25 plasma glucose (mmol/L), and systolic blood pressure (mmHg).  
26  
27  
28  
29  
30  
31  
32  
33  
34  
35  
36  
37  
38  
39  
40  
41  
42  
43  
44  
45  
46  
47  
48  
49  
50  
51  
52  
53  
54  
55  
56  
57  
58  
59  
60

**Supplemental Table 1. The association of mid-upper arm circumference with cardiometabolic profiles in women**

|                                      | Model 1           |                | Model 2           |                | Model 3            |                |
|--------------------------------------|-------------------|----------------|-------------------|----------------|--------------------|----------------|
|                                      | $\beta \pm SE$    | <i>P</i> value | $\beta \pm SE$    | <i>P</i> value | $\beta \pm SE$     | <i>P</i> value |
| Age (years)                          | -0.10 $\pm$ 0.04  | 0.01           | /                 | /              | /                  | /              |
| Body mass index (kg/m <sup>2</sup> ) | 0.76 $\pm$ 0.03   | <0.0001        | /                 | /              | /                  | /              |
| Waist circumference (cm)             | 1.89 $\pm$ 0.04   | <0.0001        | 1.71 $\pm$ 0.05   | <0.0001        | /                  | /              |
| Systolic blood pressure (mmHg)       | 0.59 $\pm$ 0.09   | <0.0001        | 0.54 $\pm$ 0.10   | <0.0001        | 0.24 $\pm$ 0.12    | 0.06           |
| Diastolic blood pressure (mmHg)      | 0.41 $\pm$ 0.05   | <0.0001        | 0.33 $\pm$ 0.06   | <0.0001        | 0.10 $\pm$ 0.07    | 0.16           |
| Fasting plasma glucose (mmol/L)      | 0.03 $\pm$ 0.007  | <0.0001        | 0.02 $\pm$ 0.008  | 0.003          | -0.01 $\pm$ 0.01   | 0.21           |
| HOMA-IR                              | 0.03 $\pm$ 0.001  | <0.0001        | 0.02 $\pm$ 0.002  | <0.0001        | 0.01 $\pm$ 0.002   | 0.0001         |
| Total cholesterol (mmol/L)           | 0.01 $\pm$ 0.005  | 0.06           | 0.01 $\pm$ 0.01   | 0.40           | -0.003 $\pm$ 0.01  | 0.64           |
| LDL-C (mmol/L)                       | 0.02 $\pm$ 0.004  | <0.0001        | 0.01 $\pm$ 0.005  | 0.006          | 0.004 $\pm$ 0.006  | 0.49           |
| HDL-C (mmol/L)                       | -0.01 $\pm$ 0.001 | <0.0001        | -0.01 $\pm$ 0.002 | <0.0001        | -0.002 $\pm$ 0.002 | 0.48           |

1  
2  
3  
4  
5  
6  
7  
8  
9  
10  
11  
12  
13  
14  
15  
16  
17  
18  
19  
20  
21  
22  
23  
24  
25  
26  
27  
28  
29  
30  
31  
32  
33  
34  
35  
36  
37  
38  
39  
40  
41  
42  
43  
44  
45  
46

|                           |               |         |               |         |               |        |
|---------------------------|---------------|---------|---------------|---------|---------------|--------|
| Triglycerides (mmol/L)    | 0.01 ± 0.001  | <0.0001 | 0.01 ± 0.001  | <0.0001 | 0.001 ± 0.002 | 0.71   |
| C-reactive protein (mg/L) | 0.02 ± 0.001  | <0.0001 | 0.02 ± 0.002  | <0.0001 | 0.006 ± 0.002 | 0.002  |
| CIMT (cm)                 | 0.003 ± 0.001 | <0.0001 | 0.003 ± 0.001 | <0.0001 | 0.003 ± 0.001 | 0.0007 |

Data are linear regression estimates ± standard error ( $\beta \pm SE$ ). *P* values were calculated from multivariable linear regression model.

Model 1: unadjusted;

Model 2: adjusted for age (years), sex, body mass index (kg/m<sup>2</sup>), current smoking (yes or no), current drinking (yes or no), physical activity (MET-h/wk);

Model 3: further adjusted for waist circumference (cm).

Abbreviations: LDL-C, low-density lipoprotein cholesterol; HDL-C, high-density lipoprotein cholesterol; CIMT, carotid intima-media thickness.

**Supplemental Table 2. The association of mid-upper arm circumference with cardiometabolic profiles in men**

|                                      | Model 1           |                | Model 2           |                | Model 3            |                |
|--------------------------------------|-------------------|----------------|-------------------|----------------|--------------------|----------------|
|                                      | $\beta \pm SE$    | <i>P</i> value | $\beta \pm SE$    | <i>P</i> value | $\beta \pm SE$     | <i>P</i> value |
| Age (years)                          | -0.47 $\pm$ 0.06  | <0.0001        | /                 | /              | /                  | /              |
| Body mass index (kg/m <sup>2</sup> ) | 0.61 $\pm$ 0.02   | <0.0001        | /                 | /              | /                  | /              |
| Waist circumference (cm)             | 1.84 $\pm$ 0.06   | <0.0001        | 1.15 $\pm$ 0.07   | <0.0001        | /                  | /              |
| Systolic blood pressure (mmHg)       | 0.57 $\pm$ 0.12   | <0.0001        | 0.21 $\pm$ 0.16   | 0.18           | 0.06 $\pm$ 0.17    | 0.73           |
| Diastolic blood pressure (mmHg)      | 0.51 $\pm$ 0.07   | <0.0001        | 0.16 $\pm$ 0.09   | 0.07           | 0.03 $\pm$ 0.10    | 0.78           |
| Fasting plasma glucose (mmol/L)      | 0.02 $\pm$ 0.01   | 0.06           | 0.004 $\pm$ 0.02  | 0.83           | -0.03 $\pm$ 0.02   | 0.11           |
| HOMA-IR                              | 0.03 $\pm$ 0.002  | <0.0001        | 0.01 $\pm$ 0.003  | <0.0001        | 0.002 $\pm$ 0.003  | 0.57           |
| Total cholesterol (mmol/L)           | 0.003 $\pm$ 0.006 | 0.57           | -0.004 $\pm$ 0.01 | 0.65           | -0.01 $\pm$ 0.01   | 0.15           |
| LDL-C (mmol/L)                       | 0.02 $\pm$ 0.005  | 0.0007         | 0.006 $\pm$ 0.007 | 0.40           | -0.004 $\pm$ 0.008 | 0.55           |
| HDL-C (mmol/L)                       | -0.02 $\pm$ 0.002 | <0.0001        | -0.01 $\pm$ 0.003 | <0.0001        | -0.005 $\pm$ 0.003 | 0.08           |



1  
2  
3  
4  
5  
6  
7  
8  
9  
10  
11  
12  
13  
14  
15  
16  
17  
18  
19  
20  
21  
22  
23  
24  
25  
26  
27  
28  
29  
30  
31  
32  
33  
34  
35  
36  
37  
38  
39  
40  
41  
42  
43  
44  
45  
46

|                           |                |         |               |      |                |      |
|---------------------------|----------------|---------|---------------|------|----------------|------|
| Triglycerides (mmol/L)    | 0.01 ± 0.002   | <0.0001 | 0.005 ± 0.002 | 0.01 | 0.001 ± 0.002  | 0.75 |
| C-reactive protein (mg/L) | 0.01 ± 0.002   | 0.0002  | 0.003 ± 0.003 | 0.31 | -0.005 ± 0.003 | 0.09 |
| CIMT (cm)                 | -0.001 ± 0.001 | 0.33    | 0.001 ± 0.002 | 0.48 | 0.001 ± 0.002  | 0.69 |

Data are linear regression estimates ± standard error ( $\beta \pm SE$ ). *P* values were calculated from multivariable linear regression model.

Model 1: unadjusted;

Model 2: adjusted for age (years), sex, body mass index (kg/m<sup>2</sup>), current smoking (yes or no), current drinking (yes or no), physical activity (MET-h/wk);

Model 3: further adjusted for waist circumference (cm).

Abbreviations: LDL-C, low-density lipoprotein cholesterol; HDL-C, high-density lipoprotein cholesterol; CIMT, carotid intima-media thickness.

Supplemental Figure 1

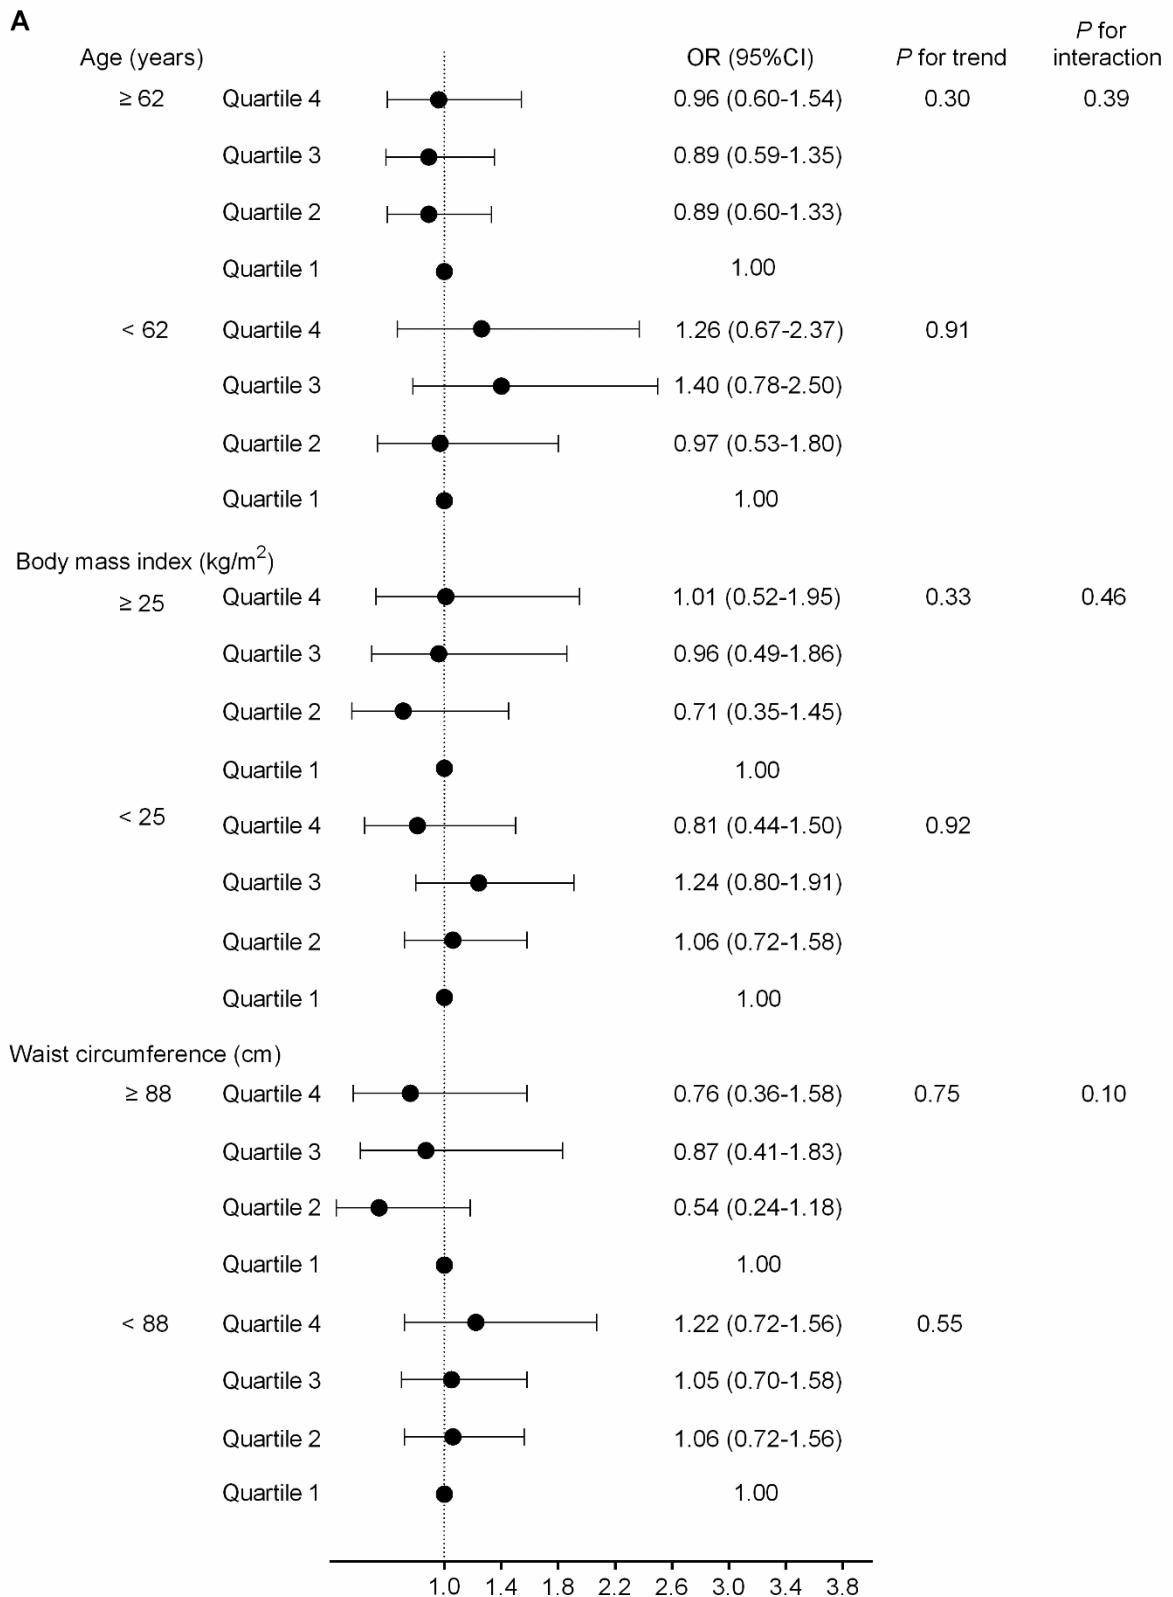

**B**

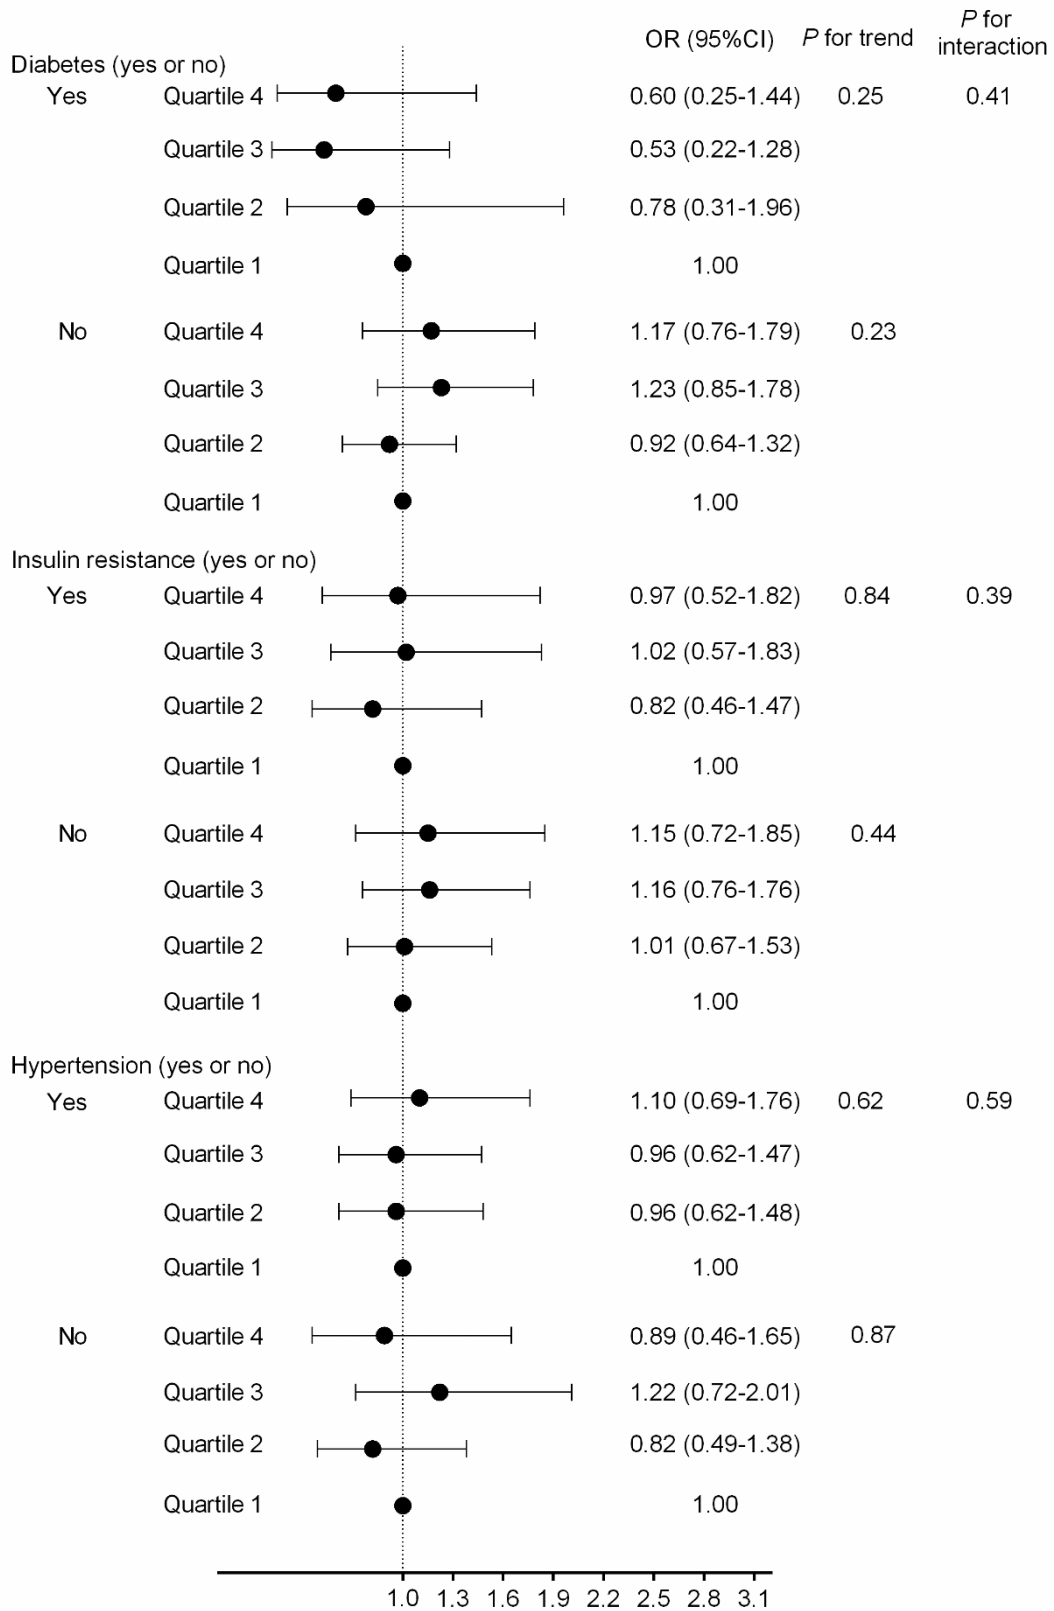

# BMJ Open

## Association between mid-upper arm circumference and cardiometabolic risk in Chinese population: a cross-sectional study

|                                 |                                                                                                                                                                                                                                                                                                                                                                                                                                                                                                                                                                                                                                                                                                                                                                                                                                                                                                                                                                                                                                                                                                                                                                                                                                                                                                                                                                                                                                                                                                 |
|---------------------------------|-------------------------------------------------------------------------------------------------------------------------------------------------------------------------------------------------------------------------------------------------------------------------------------------------------------------------------------------------------------------------------------------------------------------------------------------------------------------------------------------------------------------------------------------------------------------------------------------------------------------------------------------------------------------------------------------------------------------------------------------------------------------------------------------------------------------------------------------------------------------------------------------------------------------------------------------------------------------------------------------------------------------------------------------------------------------------------------------------------------------------------------------------------------------------------------------------------------------------------------------------------------------------------------------------------------------------------------------------------------------------------------------------------------------------------------------------------------------------------------------------|
| Journal:                        | <i>BMJ Open</i>                                                                                                                                                                                                                                                                                                                                                                                                                                                                                                                                                                                                                                                                                                                                                                                                                                                                                                                                                                                                                                                                                                                                                                                                                                                                                                                                                                                                                                                                                 |
| Manuscript ID                   | bmjopen-2019-028904.R1                                                                                                                                                                                                                                                                                                                                                                                                                                                                                                                                                                                                                                                                                                                                                                                                                                                                                                                                                                                                                                                                                                                                                                                                                                                                                                                                                                                                                                                                          |
| Article Type:                   | Research                                                                                                                                                                                                                                                                                                                                                                                                                                                                                                                                                                                                                                                                                                                                                                                                                                                                                                                                                                                                                                                                                                                                                                                                                                                                                                                                                                                                                                                                                        |
| Date Submitted by the Author:   | 21-May-2019                                                                                                                                                                                                                                                                                                                                                                                                                                                                                                                                                                                                                                                                                                                                                                                                                                                                                                                                                                                                                                                                                                                                                                                                                                                                                                                                                                                                                                                                                     |
| Complete List of Authors:       | Hou, Yanan; Shanghai Jiao Tong University Medical School Affiliated Ruijin Hospital<br>Jia, Xu; Shanghai Jiao Tong University Medical School Affiliated Ruijin Hospital<br>Xuan, Liping; Shanghai Jiao Tong University Medical School Affiliated Ruijin Hospital<br>Zhu, Wen; Shanghai Jiao Tong University Medical School Affiliated Ruijin Hospital<br>Deng, Chanjuan; Shanghai Jiao Tong University Medical School Affiliated Ruijin Hospital<br>Wang, Long; Shanghai Jiao Tong University Medical School Affiliated Ruijin Hospital<br>Zhao, Zhiyun; Shanghai Jiao Tong University Medical School Affiliated Ruijin Hospital<br>Li, Mian; Shanghai Jiao Tong University Medical School Affiliated Ruijin Hospital<br>Lu, Jieli; Rui-Jin Hospital, Shanghai Jiao-Tong University School of Medicine, Department of Endocrine and Metabolic Diseases<br>Xu, Yu; Shanghai Jiao Tong University Medical School Affiliated Ruijin Hospital<br>Chen, Yuhong; Shanghai Jiao Tong University Medical School Affiliated Ruijin Hospital<br>Wang, Weiqing; Shanghai Jiao Tong University Medical School Affiliated Ruijin Hospital<br>Bi, Yufang; Rui-Jin Hospital, Shanghai Jiao-Tong University School of Medicine, Department of Endocrine and Metabolic Diseases<br>Xu, Min; Rui-Jin Hospital, Shanghai Jiao-Tong University School of Medicine, Shanghai Institute of Endocrine and Metabolic Diseases<br>Wang, Tiange; Shanghai Jiao Tong University Medical School Affiliated Ruijin Hospital, |
| <b>Primary Subject Heading</b>: | Epidemiology                                                                                                                                                                                                                                                                                                                                                                                                                                                                                                                                                                                                                                                                                                                                                                                                                                                                                                                                                                                                                                                                                                                                                                                                                                                                                                                                                                                                                                                                                    |
| Secondary Subject Heading:      | Diabetes and endocrinology, Cardiovascular medicine                                                                                                                                                                                                                                                                                                                                                                                                                                                                                                                                                                                                                                                                                                                                                                                                                                                                                                                                                                                                                                                                                                                                                                                                                                                                                                                                                                                                                                             |
| Keywords:                       | cardiometabolic risk, mid-upper arm circumference, subclinical atherosclerosis, upper body fat, Chinese adults                                                                                                                                                                                                                                                                                                                                                                                                                                                                                                                                                                                                                                                                                                                                                                                                                                                                                                                                                                                                                                                                                                                                                                                                                                                                                                                                                                                  |

1  
2  
3  
4  
5  
6  
7  
8  
9  
10  
11  
12  
13  
14  
15  
16  
17  
18  
19  
20  
21  
22  
23  
24  
25  
26  
27  
28  
29  
30  
31  
32  
33  
34  
35  
36  
37  
38  
39  
40  
41  
42  
43  
44  
45  
46  
47  
48  
49  
50  
51  
52  
53  
54  
55  
56  
57  
58  
59  
60

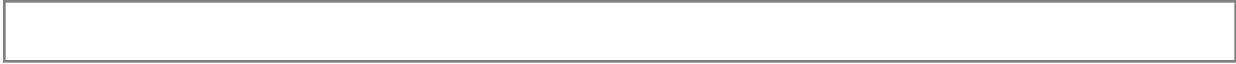

SCHOLARONE™  
Manuscripts

1 **Association between mid-upper arm circumference and cardiometabolic risk in**  
2 **Chinese population: a cross-sectional study**

3  
4 **Running title: Upper body fat and cardiometabolic risk**

5  
6 Yanan Hou<sup>1,2</sup>, Xu Jia<sup>1,2</sup>, Liping Xuan<sup>1,2</sup>, Wen Zhu<sup>1,2</sup>, Chanjuan Deng<sup>1,2</sup>, Long Wang<sup>1,2</sup>,  
7 Zhiyun Zhao<sup>1,2</sup>, Mian Li<sup>1,2</sup>, Jieli Lu<sup>1,2</sup>, Yu Xu<sup>1,2</sup>, Yuhong Chen<sup>1,2</sup>, Weiqing Wang<sup>1,2</sup>,  
8 Yufang Bi<sup>1,2</sup>, Min Xu<sup>1,2</sup>, Tiange Wang<sup>1,2¶</sup>

9  
10 <sup>1</sup> State Key Laboratory of Medical Genomics, Key Laboratory for Endocrine and  
11 Metabolic Diseases of Ministry of Health, National Clinical Research Center for  
12 Metabolic Diseases, Shanghai Clinical Center for Endocrine and Metabolic Diseases,  
13 Rui-Jin Hospital, Shanghai Jiao Tong University School of Medicine, Shanghai,  
14 200025, China;

15 <sup>2</sup> Shanghai Institute of Endocrine and Metabolic Diseases, Department of Endocrine and  
16 Metabolic Diseases, Rui-Jin Hospital, Shanghai Jiao Tong University School of  
17 Medicine, Shanghai, 200025, China.

18  
19 **¶Corresponding author:**

20 Tiange Wang, MD, PhD

21 State Key Laboratory of Medical Genomics, Key Laboratory for Endocrine and  
22 Metabolic Diseases of Ministry of Health, National Clinical Research Center for  
23 Metabolic Diseases, Shanghai Clinical Center for Endocrine and Metabolic Diseases,  
24 Shanghai Institute of Endocrine and Metabolic Diseases, Rui-Jin Hospital, Shanghai

1  
2  
3  
4  
5  
6  
7  
8  
9  
10  
11  
12  
13  
14  
15  
16  
17  
18  
19  
20  
21  
22  
23  
24  
25  
26  
27  
28  
29  
30  
31  
32  
33  
34  
35  
36  
37  
38  
39  
40  
41  
42  
43  
44  
45  
46  
47  
48  
49  
50  
51  
52  
53  
54  
55  
56  
57  
58  
59  
60

25 Jiao Tong University School of Medicine, 197 Rui-Jin 2nd Road, Shanghai 200025,  
26 China. Telephone: 86-21-64370045; Fax: 86-21-64749885; E-mail: [wtg@live.cn](mailto:wtg@live.cn).

For peer review only

1  
2  
3 **Abstract**  
4

5 **Objectives:** Upper body fat has been associated with an unfavorable cardiometabolic  
6  
7 risk. We aimed to investigate the associations between mid-upper arm circumference  
8  
9 (MUAC), a novel indicator of upper body fat, and a wide spectrum of cardiometabolic  
10  
11 risk profiles in Chinese population.  
12  
13

14 **Design and setting:** Cross-sectional analyses were performed using data from a well-  
15  
16 defined community in 2014, Shanghai, China.  
17  
18

19 **Participants:** The study population consisted of 6287 participants with complete  
20  
21 measurement data (men n=2310, women n=3977).  
22  
23

24 **Outcome measures:** Multivariable logistic regression model was used to explore the  
25  
26 associations of MUAC with cardiometabolic disorders including central obesity,  
27  
28 diabetes, hypertension, hypertriglyceridemia, low HDL cholesterol and subclinical  
29  
30 atherosclerosis.  
31  
32

33 **Results:** In overall participants, each 1-SD increment in MUAC (3.13 cm) was  
34  
35 positively associated with central obesity (OR, 2.05; 95% CI, 1.85-2.28), hypertension  
36  
37 (OR, 1.10; 95% CI, 1.03-1.19), and low HDL cholesterol (OR, 1.10; 95% CI, 1.01-  
38  
39 1.22), after multivariable adjustment. Multivariable-adjusted ORs for subclinical  
40  
41 atherosclerosis was gradually increased across increasing quartiles of MUAC with the  
42  
43 lowest quartile as reference (quartile 2: OR, 1.31; 95% CI, 1.09-1.58; quartile 3: 1.33;  
44  
45 1.10-1.62; quartile 4: 1.45; 1.16-1.80,  $P_{for\ trend} = 0.005$ ) among total participants, and  
46  
47 such association was more prominent among women than men. Additionally, MUAC  
48  
49 was significantly interacted with diabetes and insulin resistance on subclinical  
50  
51 atherosclerosis ( $P_{for\ interaction} = 0.04$  and  $0.01$ , respectively).  
52  
53  
54  
55  
56  
57  
58  
59  
60



1  
2  
3 50 **Conclusion:** A greater MUAC was positively associated with several cardiometabolic  
4  
5 51 disorders and subclinical atherosclerosis in Chinese population, and such association  
6  
7 52 patterns were more significant among women.  
8  
9

10 53  
11  
12 54 **Keywords:** Cardiometabolic risk, mid-upper arm circumference, subclinical  
13  
14 55 atherosclerosis, upper body fat, Chinese adults  
15  
16

17 56  
18  
19 57 **Strengths and limitations of this study:**  
20

21 58 • The strength of the current study was evidenced by a well-defined community setting,  
22  
23 59 fair sized sample volume, and desirable population homogeneity.  
24  
25

26 60 • The comprehensive examination of the associations between MUAC and a wide  
27  
28 61 spectrum of cardiometabolic risk profiles including central obesity, diabetes,  
29  
30 62 hypertension, hypertriglyceridemia, low HDL cholesterol and subclinical  
31  
32 63 atherosclerosis.  
33  
34

35 64 • Although our findings support that MUAC could be a reliable surrogate of upper body  
36  
37 65 adiposity, MUAC is a measure which comprised both adipose and lean tissue rather  
38  
39 66 than a direct indicator for adiposity.  
40  
41

42 67 • As body composition changes over time, the narrow range of age for the participants  
43  
44 68 enrolled could affect the outcome.  
45  
46

47 69 • Since our study was performed in a Chinese population, it should be cautiously to  
48  
49 70 generalize the results to the other ethnicities.  
50  
51  
52  
53  
54  
55  
56  
57  
58  
59  
60

## 71 **Introduction**

72 Cardiometabolic disorders describe a spectrum of interconnected pathological  
73 alterations in the cardiovascular system and metabolic organs that symbiotically  
74 increase the risk of cardiovascular disease (CVD), which is a major cause of mortality  
75 and burden of healthcare expenditure worldwide.<sup>1-5</sup> Several important cardiometabolic  
76 disorders, including obesity, diabetes, insulin resistance, dyslipidemia, and  
77 hypertension, are major risk factors for CVD and could be served as early targets for  
78 early identification and personalized prevention for CVD.<sup>2-5</sup> In addition, as a common  
79 contributor of CVD, atherosclerosis goes through a protracted subclinical phase and  
80 could only be detected at an advanced stage of CVD.<sup>6,7</sup> Thus, the identification of  
81 subclinical atherosclerosis in the asymptomatic period is also critical for prevention of  
82 CVD progression. Noninvasive ultrasonography measured carotid intima media  
83 thickness (CIMT) is a well-established clinical index for early arteriosclerosis detection  
84 and therefore has been extensively adopted to measure subclinical atherosclerosis.<sup>8</sup>

85       Meanwhile, fat distribution, specifically upper body and visceral adiposity, is  
86 proven highly relevant to cardiovascular risk.<sup>9,10</sup> In addition to the conventional body fat  
87 indices such as body mass index (BMI) and waist circumference (WC), mid-upper arm  
88 circumference (MUAC), as a novel anthropometric measurement, has been widely used  
89 for screening of malnutrition, adiposity and chronic diseases.<sup>11</sup> Several epidemiological  
90 studies have revealed inconsistent results on the relationship between MUAC and  
91 cardiometabolic risk. A cross-sectional study using data from the 1999 to 2006 National  
92 Health and Nutrition Examination Survey (NHANES) reported that MUAC was  
93 positively associated with insulin resistance in non-obese individuals; while no  
94 significant association was found in obese individuals.<sup>9</sup> In a prospective cohort of 1061  
95 European elderly participants with a follow-up of approximately 6 years, a larger

1  
2  
3 96 MUAC was associated with elevated risks of all-cause and cardiovascular diseases  
4  
5 97 mortality.<sup>12</sup> In contrast, in the Canada Fitness Survey of 10638 adults, a larger MUAC  
6  
7 98 was independently associated with a lower risk of all-cause mortality.<sup>13</sup> And such  
8  
9  
10 99 inverse association between a larger MUAC and a lower risk of mortality was also  
11  
12 100 documented in the British National Diet and Nutrition Survey of 1054 participants with  
13  
14 101 more than 15 years of followed up.<sup>14</sup>  
15  
16

17 102 Most of these previous studies were conducted in European population; so far,  
18  
19 103 comprehensive data on the associations between MUAC and cardiovascular risk  
20  
21 104 profiles in Chinese population are limited. Chinese population tend to have a higher  
22  
23 105 percentage of body fat, a weaker willingness on body build, and less muscle mass as  
24  
25 106 well as connective tissue,<sup>15</sup> as compared with their European counterparts. And these  
26  
27 107 different features may translate into varying susceptibilities to adiposity related  
28  
29 108 cardiometabolic disorders. Therefore, this study aimed to investigate the association  
30  
31 109 between MUAC and cardiometabolic disorders as well as subclinical atherosclerosis in  
32  
33 110 Chinese population.  
34  
35  
36  
37  
38  
39

## 40 112 **Methods**

### 41 113 **Study population**

42  
43 114 This is a cross-sectional analysis based on one of the follow-up circles of our  
44  
45 115 established community-based cohort.<sup>16,17</sup> Eligible participants aged 40 years or above  
46  
47 116 were identified from the local residence registration records. There was no restriction on  
48  
49 117 ethnicity or gender. Each eligible participant was recruited by trained community staff  
50  
51 118 and local health workers using a door-to-door invitation method. Participants who  
52  
53 119 consented for the study and signed informed consent were scheduled for health  
54  
55 120 examinations. In brief, a total of 6570 participants aged 40 years or above were enrolled  
56  
57  
58  
59  
60

1  
2  
3 121 from Jiading district, Shanghai, China, from August 2014 to May 2015. All participants  
4  
5 122 received anthropometric measurements (including height, weight, WC, and MUAC), a  
6  
7 123 standard 75-g oral glucose tolerance test (OGTT), and a standard questionnaire to  
8  
9  
10 124 acquire information regarding lifestyle factors (including smoking and alcohol drinking  
11  
12 125 habits, and physical activity), education, social demographic information, and history of  
13  
14 126 diseases and medicines. Blood samples were collected for biochemical measurements.  
15  
16  
17 127 In the present study, 283 participants were excluded due to missing data on MUAC or  
18  
19 128 CIMT. Thus, a total of 6287 participants were included in the final analysis. This study  
20  
21 129 was approved by the Institutional Review Board of Ruijin Hospital Affiliated to  
22  
23  
24 130 Shanghai Jiao Tong University School of Medicine. Written informed consent was  
25  
26 131 obtained from all study participants.  
27  
28  
29 132

### 133 **Data collection and biochemical measurements**

30  
31  
32  
33 134 Detailed information on sociodemographic characteristics, family history, medical  
34  
35 135 history, physical activity and health-related lifestyle were obtained using a standard  
36  
37 136 questionnaire by trained personnel. Current smokers or drinkers were those who  
38  
39 137 consumed any kinds of cigarettes or alcohol regularly in the past 6 months, respectively.  
40  
41  
42 138 Physical activity in term of MET hour/week was calculated according to the short form  
43  
44 139 of the International Physical Activity Questionnaire (IPAQ) including both during  
45  
46 140 leisure time and at work.<sup>18</sup>

47  
48  
49 141 Anthropometric measurements such as height, weight, WC, and MUAC were  
50  
51 142 assessed by well-trained physician according to a standard protocol. Body height and  
52  
53 143 weight were measured with participants wearing light clothes without shoes to the  
54  
55 144 nearest 0.1 centimeter (cm) and 0.1 kilogram (kg), respectively. BMI was calculated as  
56  
57 145 body weight in kilograms divided by body height squared in meters (kg/m<sup>2</sup>). MUAC  
58  
59  
60

1  
2  
3 146 was measured on the upper left arm (halfway between the acromion process and the  
4  
5 147 olecranon process) with subject's bilateral arms hanging down naturally.<sup>19</sup> WC was  
6  
7 148 measured at the level of the umbilicus with the participants in the standing position.  
8  
9  
10 149 Systolic and diastolic blood pressures were measured in the non-dominant arm with an  
11  
12 150 automated electronic sphygmomanometer (OMRON Model HEM-752 FUZZY, Omron  
13  
14 151 Company, Dalian, China) three times (averaged for analysis) consecutively with 1 min  
15  
16 152 intervals after at least 5 min rest in a seated position.

17  
18  
19 153 All participants underwent a 75-g glucose tolerance test (OGTT) after an overnight  
20  
21 154 fasting (nothing by mouth after midnight), of whom fasting plasma glucose and OGTT  
22  
23 155 2-hour plasma glucose were measured using hexokinase method on a clinical chemistry  
24  
25 156 diagnostic system (Modular P800; Roche, Basel, Switzerland). Serum concentrations of  
26  
27 157 total cholesterol, triglycerides, high-density lipoprotein (HDL-C) and low-density  
28  
29 158 lipoprotein (LDL-C) cholesterol were measured by an autoanalyzer (Modular E170;  
30  
31 159 Roche). High sensitive C-reactive protein concentration was determined by highly  
32  
33 160 sensitive competitive immunoassay (antigens and antibodies from Beckman coulter  
34  
35 161 IMAGE800, America). Serum insulin was measured by using the  
36  
37 162 electrochemiluminescence methods on an Immunology analyzer (RIABEAD II; Abbott,  
38  
39 163 Tokyo, Japan). Homeostasis model assessment of insulin resistance (HOMA-IR) was  
40  
41 164 calculated as fasting insulin ( $\mu\text{IU/mL}$ )  $\times$  fasting plasma glucose (mmol/L) / 22.5, and  
42  
43 165 insulin resistance was defined as HOMA-IR  $\geq$  2.8, which is the cut-off point for the  
44  
45 166 highest quartile of the total participants.  
46  
47  
48  
49  
50

51 167

### 52 168 **Definitions of cardiometabolic risk profile**

53  
54  
55 169 Type 2 diabetes was defined as fasting plasma glucose  $\geq$  7.0 mmol/L or OGTT 2-hour  
56  
57 170 plasma glucose  $\geq$  11.1 mmol/L or use of anti-diabetic agents.<sup>20</sup> Hypertension was  
58  
59  
60

1  
2  
3 171 defined as systolic blood pressure  $\geq 140$  mmHg, diastolic blood pressure  $\geq 90$  mmHg or  
4  
5 172 current taking an antihypertensive medication.<sup>21</sup> Central obesity was defined as WC  $\geq$   
6  
7 173 102 cm for men and  $\geq 88$  cm for women. Hypertriglyceridemia was defined as  
8  
9 174 triglycerides  $\geq 2.26$  mmol/L. Low HDL cholesterol was defined as a level of HDL-C  $<$   
10  
11 175 1.04 mmol/L.  
12  
13

14 176 CIMT measurement was conducted by a trained sonographer using a high-  
15  
16 177 resolution B-mode tomographic ultrasound system (Esaote Biomedica SpA, Genoa,  
17  
18 178 Italy) with a linear 7.5 MHz transducer.<sup>22</sup> The position of CIMT measurement was  
19  
20 179 recorded on the far wall of both right and left common carotid arteries, 1.5 cm proximal  
21  
22 180 to the bifurcation. CIMT was measured on-line at the end of diastole as a distance from  
23  
24 181 the leading edge of the first echogenic line to that of the second. These two lines  
25  
26 182 represent the lumen-intima interface and collagen-contained upper layer of tunic  
27  
28 183 adventitia, respectively. Subclinical atherosclerosis was defined as a bilateral CIMT  
29  
30 184 average greater than 0.8 mm, which is the highest quartile cut-off point of the total  
31  
32 185 participants.  
33  
34  
35  
36  
37  
38  
39

#### 40 187 **Statistical analyses**

41  
42 188 SAS version 9.4 (SAS Institute Inc, Cary, NC, USA) was used for data management  
43  
44 189 and statistical analysis. Continuous variables were described as means  $\pm$  standard  
45  
46 190 deviations (SDs) or medians (inter-quartile ranges), and categorical variables as  
47  
48 191 numbers (percentages). Variables with skewed distributions, such as HOMA-IR,  
49  
50 192 triglycerides, and C-reactive protein, were normalized by logarithmic transformation  
51  
52 193 before analysis.  
53  
54  
55

56 194 All participants were divided into four subgroups according to quartiles of MUAC.  
57  
58 195 The ranges of MUAC within each quartile were 15.5 to 27.1 cm for quartile 1, 27.2 to  
59  
60

1  
2  
3 196 29.1 cm for quartile 2, 29.2 to 31.2 cm for quartile 3, and 31.3 to 43.3 cm for quartile 4.  
4  
5 197 Linear regression analysis was used to test for trend across the MUAC quartiles for  
6  
7 198 continuous variables and the Cochran-Armitage trend chi-square test was used for  
8  
9  
10 199 categorical variables. Multivariable linear regression and multivariable logistic  
11  
12 200 regression analyses were conducted to assess the associations of MUAC with a wide  
13  
14 201 spectrum of cardiometabolic disorders and subclinical atherosclerosis, with adjustment  
15  
16 202 for age, sex, BMI, current smoking, current drinking, physical activity, WC, C-reactive  
17  
18 203 protein, total cholesterol, HDL-C, LDL-C, triglycerides, fasting plasma glucose, and  
19  
20 204 systolic blood pressure. Stratified analyses by age, BMI, WC, diabetes, insulin  
21  
22 205 resistance, and hypertension were performed. Interactions were tested by adding the  
23  
24 206 respective multiplicative terms in the models simultaneously. Statistical significance  
25  
26 207 was set to a two-sided *P* value of less than 0.05.  
27  
28  
29  
30  
31  
32

### 33 209 **Patient and public involvement**

34  
35 210 This study was conducted without patient and public involvement. No patients were  
36  
37 211 invited to take part in the development of the research question and outcome  
38  
39 212 measures, the study design and the interpretation of the results. The findings from this  
40  
41 213 study will be disseminated to the participants after the results are published in a peer-  
42  
43 214 reviewed journal.  
44  
45  
46  
47  
48

### 49 216 **Results**

#### 51 217 **Characteristics of the study participants**

52  
53 218 The study sample consisted of 2310 (36.7%) men and 3977 (63.3%) women with an  
54  
55 219 average age of 62.2 years (SD: 8.78). Detailed sociodemographic and clinical  
56  
57 220 characteristics of the study participants according to MUAC quartiles are shown in  
58  
59  
60

1  
2  
3 221 Table 1. Participants with a large MUAC were more likely to have higher levels of  
4  
5 222 BMI, WC, systolic and diastolic blood pressures, fasting plasma glucose, HOMA-IR,  
6  
7 223 LDL-C, triglycerides, C-reactive protein, and CIMT, and had higher proportions of  
8  
9 224 insulin resistance, hypertension, diabetes, and subclinical atherosclerosis (all  $P$  values <  
10  
11 225 0.05). In addition, participants with a large MUAC were younger and had lower levels  
12  
13 226 of HDL-C (both  $P$  values < 0.0001) (Table 1). Multivariable linear regression analyses  
14  
15 227 revealed consistent results on the associations between MUAC and these  
16  
17 228 cardiometabolic profiles (Supplemental Table1).  
18  
19  
20  
21  
22  
23

229

### 230 **Association between MUAC and cardiometabolic disorders**

231 As shown in Table 2, a large MUAC was positively associated with central obesity,  
232 diabetes, hypertension, hypertriglyceridemia, and low HDL cholesterol after adjustment  
233 for age, sex, BMI, current smoking, current drinking, and physical activity (all  $P$  values  
234 < 0.001). The multivariable-adjusted OR per 1-SD increment in MUAC (3.13 cm) was  
235 2.05 (95% CI, 1.85-2.28) for central obesity, 1.09 (1.02-1.16) for diabetes, 1.21 (1.14-  
236 1.30) for hypertension, 1.24 (1.15-1.35) for hypertriglyceridemia, and 1.26 (1.16-1.37)  
237 for low HDL cholesterol. Most of these associations were not substantially changed  
238 after additional adjustment for WC (all  $P$  values  $\leq$  0.03), except for diabetes and  
239 hypertriglyceridemia. When stratified by sex, more prominent results were observed  
240 among women.

241

### 242 **Association between MUAC and subclinical atherosclerosis**

243 In total participants, we observed strong and positive association between MUAC and  
244 subclinical atherosclerosis with fully adjustment (Table 3). The OR for subclinical  
245 atherosclerosis was 1.31 (95% CI, 1.09-1.58) within quartile 2 of MUAC, 1.33 (95%



246 CI, 1.10-1.62) within quartile 3, and 1.45 (95% CI, 1.16-1.80) within quartile 4, as  
247 compared with the lowest quartile ( $P_{\text{for trend}} = 0.005$ ). When stratified by sex, significant  
248 results were observed among women but not among men.

249

### 250 **Stratification analyses by traditional cardiovascular risk factors**

251 We further examined the association between MUAC and subclinical atherosclerosis  
252 stratified by traditional cardiometabolic risk factors. In women, MUAC was associated  
253 with subclinical atherosclerosis among participants who aged  $\geq 62$  years, with BMI  $\geq 25$   
254 kg/m<sup>2</sup> or waist circumference  $< 88$  cm (Figure 1A), and among those with diabetes,  
255 insulin resistance, or hypertension (Figure 1B). Moreover, there were significant  
256 interactions of MUAC with diabetes and insulin resistance on subclinical  
257 atherosclerosis ( $P_{\text{for interaction}} = 0.04$  and  $0.01$ , respectively). These association patterns  
258 were not observed in men (Supplementary Figure 1).

259 To further evaluate whether the association of MUAC with subclinical  
260 atherosclerosis may be influenced by BMI and WC, we replicated the analyses within  
261 combinations of BMI and WC. In women, those with higher WC were more likely to  
262 have larger MUAC, regardless of BMI levels (Figure 2A). And MUAC was  
263 independently associated with subclinical atherosclerosis in the combination of WC  $<$   
264 88 cm and BMI  $< 25$  kg/m<sup>2</sup> (OR, 1.22; 95% CI, 1.05-1.43) and in the combination of  
265 WC  $< 88$  cm and BMI  $\geq 25$  kg/m<sup>2</sup> (OR, 1.40; 95% CI, 1.11-1.77) (Figure 2B).

266

### 267 **Discussion**

268 In this cross-sectional investigation of 6287 community dwelling Chinese adults, we  
269 found that a large MUAC was positively associated with a series of cardiometabolic  
270 disorders including central obesity, hypertension, low HDL cholesterol, and subclinical

1  
2  
3 271 atherosclerosis. Such association patterns were independent from traditional  
4  
5 272 cardiovascular risk factors, and were more prominent among women than men.  
6  
7  
8 273 Moreover, we observed significant interactions of MUAC with diabetes and insulin  
9  
10 274 resistance in relation to subclinical atherosclerosis.

11  
12 275 MUAC is a widely used indicator of upper body adiposity in children, adolescents,  
13  
14 276 and adults.<sup>23, 24</sup> Previous studies have shown mixed results on the associations between  
15  
16 277 MUAC and CVD.<sup>25-28</sup> Findings from a retrospective cohort study of 771 Japanese adults  
17  
18 278 have suggested that MUAC may play a complementary role to BMI in predicting  
19  
20 279 prognosis in patients with heart failure.<sup>25</sup> In addition, a cross-sectional study of 93  
21  
22 280 pubertal obese adolescents from Brazil have associated a larger MUAC with a higher  
23  
24 281 level of HOMAR-IR and a higher cardiometabolic risk score.<sup>26</sup> In contrast, results from  
25  
26 282 the Health Effects of Arsenic Longitudinal Study of 562 middle-aged participants who  
27  
28 283 were free of CVD in rural Bangladesh have shown no relationship between MUAC and  
29  
30 284 CIMT.<sup>28</sup> Our present study has extended the existing evidence by demonstrating that  
31  
32 285 MUAC increment was associated with an increased risk of a series of cardiometabolic  
33  
34 286 disorders including central obesity, hypertension, low HDL cholesterol, and subclinical  
35  
36 287 atherosclerosis in Chinese population, particularly among women. Central obesity,  
37  
38 288 hypertension, low HDL cholesterol, and subclinical atherosclerosis have been robustly  
39  
40 289 associated with increased risks of CVD. Detecting more effective risk factors for these  
41  
42 290 cardiometabolic disorders is critical to the prevention of CVD. Our findings suggest that  
43  
44 291 paying more attention to women with higher MUAC would be useful in the early  
45  
46 292 identification and prevention of cardiometabolic disorders.

47  
48 293 Explanations for the observations between MUAC and cardiometabolic risk are  
49  
50 294 multifactorial. Our study found that MUAC level tended to decrease with age and there  
51  
52 295 was a stronger association between MUAC and subclinical atherosclerosis among  
53  
54  
55  
56  
57  
58  
59  
60

1  
2  
3 296 women aged greater 62 years or older. Aging is a critical factor in changing process of  
4  
5 297 metabolism and body composition. Fat-free mass and muscle mass reduced while  
6  
7 298 substantial visceral fat rather than subcutaneous fat increased with aging, even under the  
8  
9 299 condition of body weight unchanged. Individuals with age greater than 65 years suffer a  
10  
11 300 reduction rate over 25 percent per year for muscle mass; and this rate can be accelerated  
12  
13 301 to 50 percent per year for those older than 80 years.<sup>28-30</sup> In addition, we found that  
14  
15 302 MUAC was associated with subclinical atherosclerosis in a sex-specific manner. One  
16  
17 303 plausible explanation for the sex difference in MUAC-subclinical atherosclerosis  
18  
19 304 relationship is biological differences between men and women, such as hormones effect,  
20  
21 305 immune system responses, muscle capacity and physical function. For instance, men  
22  
23 306 tend to have greater muscle capacity and higher muscle mass than women due to higher  
24  
25 307 levels of testosterone.<sup>24</sup> Body fat redistributes to upper body and to a preferential  
26  
27 308 adiposity around the waist with age and this trend was more obvious in women than in  
28  
29 309 men.<sup>30</sup> The sex difference in redistribution of body fat may partly contribute to the  
30  
31 310 observed more predominant associations between MUAC and cardiometabolic  
32  
33 311 disorders among women.

34  
35  
36  
37  
38  
39 312 The unique advantage of the present study is that we comprehensively determined  
40  
41 313 the association of MUAC with a wide spectrum of cardiometabolic risk profiles in a  
42  
43 314 well-defined community setting with fair sized sample and desirable population  
44  
45 315 homogeneity. However, several limitations should be considered. Firstly, the cross-  
46  
47 316 sectional nature of present study means no causal inference can be drawn. Secondly,  
48  
49 317 although our finding supported that it can be a reliable surrogate of upper body  
50  
51 318 adiposity, MUAC is a measure comprised of both adipose and lean tissue rather than a  
52  
53 319 direct indicator for adiposity. Thirdly, as body composition changes over time, the  
54  
55 320 narrow range of age for the participants enrolled could affected the outcome. Fourthly,  
56  
57  
58  
59  
60

1  
2  
3 321 MUAC measurement was performed on the left arm, though it should be determined on  
4  
5 322 the non-dominant arm. Given the fact that the majority of Chinese population were  
6  
7 323 right-handers, measurement protocol employed in our study for MUAC was acceptable.  
8  
9 324 Finally, since our study was performed in a Chinese population, it should be cautiously  
10  
11 325 to generalize the results to other ethnicities.  
12  
13

14 326 In conclusion, our study provides evidence of positive associations of MUAC with  
15  
16 327 cardiometabolic disorders as well as subclinical atherosclerosis in Chinese population.  
17  
18 328 These results suggest that MUAC, as a convenient and inexpensive measurable metric,  
19  
20 329 can be potentially used as a risk stratification tool in cardiometabolic disorders. Given  
21  
22 330 the reliable assessment of MUAC in middle aged and elderly population and the  
23  
24 331 accelerating rise rate of atherosclerosis in China, MUAC may be used as a valuable  
25  
26 332 indicator for early prevention of CVD.  
27  
28  
29  
30  
31  
32  
33  
34  
35  
36  
37  
38  
39  
40  
41  
42  
43  
44  
45  
46  
47  
48  
49  
50  
51  
52  
53  
54  
55  
56  
57  
58  
59  
60

1  
2  
3 333 **Acknowledgments**  
4

5 334 We thank all the study participants for their participation and contribution. The present  
6  
7 335 study would not have been possible without the participation of the participants.  
8  
9

10 336

11  
12 337 **Footnotes**  
13

14 338 **Contributors:** All authors had full access to all of the data in the study and take  
15  
16  
17 339 responsibility for the integrity of the data and the accuracy of the data analysis. Study  
18  
19 340 concept and design: TW, MX, YB and WW. Acquisition of data: YH, XJ, LX, WZ, CD,  
20  
21 341 LW, ZZ, ML, JL, YX, and YC. Analysis and interpretation of data: YH, TW, MX, YB  
22  
23 342 and WW. Drafting of the manuscript: YH. Critical revision of the manuscript: TW, MX,  
24  
25 343 YB and WW. Statistical analysis: YH and XJ.  
26  
27

28 344 **Funding:** This work was supported by grants from the National Natural Science  
29  
30 345 Foundation of China (81770842 and 81561128019), the Ministry of Science and  
31  
32 346 Technology of China (2018YFC1311705, 2016YFC1305600 and 2016YFC1304904),  
33  
34 347 the Shanghai Pujiang Program (18PJ1409600), the “Shanghai Municipal Education  
35  
36 348 Commission–Gaofeng Clinical Medicine Grant Support” from Shanghai Jiao Tong  
37  
38 349 University School of Medicine (20171901), the Shanghai Science and Technology  
39  
40 350 Commission (YDZX20173100004881), and the Shanghai Shen-Kang Hospital  
41  
42 351 Development Center (SHDC12016202).  
43  
44  
45

46 352 **Competing interests:** None declared.  
47

48  
49 353 **Provenance and peer review:** Not commissioned; externally peer reviewed.  
50

51 354 **Data sharing statement:** No additional data available.  
52  
53  
54  
55  
56  
57  
58  
59  
60

**References**

1. Hertle E, Stehouwer CD, Van Greevenbroek MM. The complement system in human cardiometabolic disease. *Mol Immunol* 2014; 61: 135-48.
2. Kaur J. A comprehensive review on metabolic syndrome. *Cardiol Res Pract* 2014; 2014: 943162.
3. WHO (2015) Cardiovascular diseases (CVDs). Available from [www.who.int/mediacentre/factsheets/fs317/en/index.html](http://www.who.int/mediacentre/factsheets/fs317/en/index.html). Accessed 15 May 2016.
4. Leal J, Luengo-Fernández R, Gray A, et al. Economic burden of cardiovascular diseases in the enlarged European Union. *Eur Heart J* 2006; 27:1610–1619.
5. Mozaffarian D, Benjamin EJ, Go AS, et al. Heart disease and stroke statistics-2015 update: A report from the American Heart Association. *Circulation* 2015; 131: e29-e322.
6. Mao Z, Wu F, Shan Y. Identification of key gens and miRNAs associated with carotid atherosclerosis based on mRNA-seq data. *Medicine* 2018; 97: e9832.
7. Fernández-Friera L, Peñalvo JL, Fernández-Ortiz A, et al. Prevalence, vascular distribution, and multiterritorial extent of subclinical atherosclerosis in a middle-aged cohort: The PESA (Progression of Early Subclinical Atherosclerosis) Study. *Circulation* 2015; 131: 2104-2113.
8. Lorenz MW, Markus HS, Bots ML, et al. Prediction of clinical cardiovascular events with carotid intima-media thickness: a systematic review and meta-analysis. *Circulation* 2007; 115: 459-467.
9. Fox CS, Massaro JM, Hoffmann U, et al. Abdominal visceral and subcutaneous adipose tissue compartments: association with metabolic risk factors in the Framingham Heart Study. *Circulation* 2007; 116: 39-48.
10. Nielsen S, Guo Z, Johnson CM, et al. Splanchnic lipolysis in human obesity. *J Clin*

- 1  
2  
3 380 Invest 2004; 113:1582-1588.  
4  
5 381 11. Ho SC, Wang JY, Kuo HP, et al. Mid-arm and calf circumferences are stronger  
6  
7 382 mortality predictors than body mass index for patients with chronic obstructive  
8  
9 383 pulmonary disease. *Int J Chron Obstruct Pulmon Dis* 2016; 11: 2075-2080.  
10  
11  
12 384 12. Ellen L, Wanda J, Lisette C. Associations between changes in anthropometric  
13  
14 385 measures and mortality in old age: a role for mid-upper arm circumference?  
15  
16 386 *JAMDA* 2013; 187e193.  
17  
18 387 13. Mason C, Craig CL, Katzmarzyk PT. Influence of central and extremity  
19  
20 388 circumferences on all-cause mortality in men and women. *Obesity (Silver*  
21  
22 389 *Spring)* 2008; 16(12):2690-5.  
23  
24 390 14. Bates CJ, Hamer M, Mishra GD. A study of relationships between bone-related  
25  
26 391 vitamins and minerals, related risk markers, and subsequent mortality in older  
27  
28 392 British people: the National Diet and Nutrition Survey of People Aged 65 Years  
29  
30 393 and Over. *Osteoporos Int* 2012; 23: 457-466.  
31  
32  
33 394 15. Suzuki A, Abdelmalek MF, Unalp-Arida A, et al. Regional anthropometric  
34  
35 395 measures and hepatic fibrosis in patients with nonalcoholic fatty liver disease. *Clin*  
36  
37 396 *Gastroenterol Hepatol*, 2010; 8(12): 1062-1069.  
38  
39  
40 397 16. Huang Y, Bi Y, Xu M, et al. Nonalcoholic fatty liver disease is associated with  
41  
42 398 atherosclerosis in middle-aged and elderly Chinese. *Arterioscler Thromb Vasc Biol*  
43  
44 399 2012; 32: 2321-2326.  
45  
46  
47 400 17. Chen Y, Xu M, Wang T, et al. Advanced fibrosis associates with atherosclerosis in  
48  
49 401 subjects with nonalcoholic fatty liver disease. *Atherosclerosis* 2015; 241: 145-150.  
50  
51  
52 402 18. Craig CL, Marshall AL, Sjöström M, et al. International physical activity  
53  
54 403 questionnaire: 12-country reliability and validity. *Med Sci Sports Exerc* 2003;  
55  
56 404 35:1381-1395.  
57  
58  
59  
60

- 1  
2  
3 405 19. Gul Sagun, Aytekin Oguz, Engin Karagoz, et al. Application of alternative  
4  
5 406 anthropometric measurements to predict metabolic syndrome. *Clinics* 2014; 69:  
6  
7 407 347-353.  
8  
9  
10 408 20. Diagnosis and classification of diabetes mellitus. *Diabetes Care* 2014; 37 (Suppl 1):  
11  
12 409 S81-90.  
13  
14 410 21. Wang T, Xu M, Xu Y, et al. Association of Bisphenol A exposure with  
15  
16 411 hypertension and early macrovascular disease in Chinese Adults. *Medicine*  
17  
18 412 (Baltimore) 2015; 94: e1814.  
19  
20 413 22. Chen Y, Xu M, Wang T, et al. Advanced fibrosis associates with atherosclerosis in  
21  
22 414 subjects with nonalcoholic fatty liver disease. *Atherosclerosis* 2015; 241:145-150.  
23  
24 415 23. Ogden CL, Carroll MD, Curtin LR, et al. Prevalence of overweight and obesity in  
25  
26 416 the United States, 1999–2004. *JAMA* 2006; 295: 1549-55.  
27  
28 417 24. Wu LW, Lin YY, Kao TW, et al. Mid-arm circumference and all Cause,  
29  
30 418 cardiovascular, and cancer mortality among obese and non-obese US adults: the  
31  
32 419 National Health and Nutrition Examination Survey III. *Sci Rep* 2017; 7: 2302.  
33  
34 420 25. Kentaro Kamiya, Takashi Masuda, Yuya Matsue, et al. Complementary role of arm  
35  
36 421 circumference to body massindex in risk stratification in heart failure. *JACC Heart*  
37  
38 422 *Fail.* 2016; 4(4):265-73.  
39  
40 423 26. Araújo AJ, Santos AC, Prado WL. Body composition of obese adolescents:  
41  
42 424 association between adiposity indicators and cardiometabolic risk factors. *J Hum*  
43  
44 425 *Nutr Diet* 2017; 30(2):193-202.  
45  
46 426 27. Wenzhen Ge, Faruque Parvez, Fen Wu, et al. Association between anthropometric  
47  
48 427 measures of obesity and subclinical atherosclerosis in Bangladesh. *Atherosclerosis*  
49  
50 428 2014; 232(1): 234–241.  
51  
52 429 28. Tom SE, Cooper R, Patel KV, Guralnik JM. Menopausal characteristics and  
53  
54  
55  
56  
57  
58  
59  
60



- 1  
2  
3 430 physical functioning in older adulthood in the NHANES III. Menopause (New  
4  
5 431 York, NY) 2012; 19: 283.  
6  
7  
8 432 29. Neff LM, Hoffmann ME, Zeiss DM, et al. Core body temperature is lower in  
9  
10 433 postmenopausal female than premenopausal female: potential implications for  
11  
12 434 energy metabolism and midlife weight gain. Cardiovasc Endocrinol 2016; 5: 151-  
13  
14 435 154.  
15  
16  
17 436 30. Jonathan CK Wells, Philip Treleaven, and Tim J Cole. BMI compared with  
18  
19 437 dimensional body shape: the UK National Sizing Survey. Am J Clin Nutr 2007;  
20  
21 438 85:419–25.  
22  
23  
24  
25  
26  
27  
28  
29  
30  
31  
32  
33  
34  
35  
36  
37  
38  
39  
40  
41  
42  
43  
44  
45  
46  
47  
48  
49  
50  
51  
52  
53  
54  
55  
56  
57  
58  
59  
60

1  
2  
3 **439 Figure legends**  
4

5 **440 Figure 1. Stratification analysis of the association between MUAC and subclinical**

6  
7 **441 atherosclerosis in women.** A: All participants were divided into subgroups based on  
8  
9 their average age (age < 62 years, age ≥ 62 years), body mass index (BMI < 25 kg/m<sup>2</sup>,  
10  
11 BMI ≥ 25 kg/m<sup>2</sup>), or waist circumference (WC < 88 cm or WC ≥ 88 cm). B: All  
12  
13  
14 participants were divided into subgroups based on diabetes (yes or no), insulin  
15  
16 resistance (yes or no), or hypertension (yes or no). Data were presented as odds ratio  
17  
18 (OR) and 95% confidence interval (CI). *P* values were calculated from multivariable  
19  
20  
21 logistic regression analysis. Adjusted for age (years), body mass index (kg/m<sup>2</sup>), current  
22  
23  
24 smoking (yes or no), current drinking (yes or no), physical activity (MET-h/wk), WC  
25  
26  
27 (cm), C-reactive protein (mg/L), total cholesterol (mmol/L), HDL-C (mmol/L), LDL-C  
28  
29 (mmol/L), triglycerides (mmol/L), fasting plasma glucose (mmol/L), and systolic blood  
30  
31 pressure (mmHg).  
32

33 **452 Figure 2. Association between MUAC and subclinical atherosclerosis according to**

34  
35 **453 combined categories of BMI and WC.** A: MUAC in the BMI and WC subgroups in  
36  
37 women. B: Association of MUAC with risk of subclinical atherosclerosis in the BMI  
38  
39 and WC subgroups in women. MUAC: mid-upper arm circumference, BMI: body mass  
40  
41 index, WC: waist circumference. Adjusted for age (years), body mass index (kg/m<sup>2</sup>),  
42  
43  
44 current smoking (yes or no), current drinking (yes or no), physical activity (MET-h/wk),  
45  
46  
47 WC (cm), C-reactive protein (mg/L), total cholesterol (mmol/L), HDL-C (mmol/L),  
48  
49 LDL-C (mmol/L), triglycerides (mmol/L), fasting plasma glucose (mmol/L), and  
50  
51  
52 systolic blood pressure (mmHg).  
53  
54  
55  
56  
57  
58  
59  
60

**Table 1. Characteristics of study participants according to quartiles of mid-upper arm circumference in total samples**

|                                      | Mid-upper arm circumference, cm |                           |                           |                           | P for trend |
|--------------------------------------|---------------------------------|---------------------------|---------------------------|---------------------------|-------------|
|                                      | Quartile 1<br>(15.5-27.1)       | Quartile 2<br>(27.2-29.1) | Quartile 3<br>(29.2-31.2) | Quartile 4<br>(31.3-43.3) |             |
| n                                    | 1510                            | 1570                      | 1582                      | 1625                      |             |
| Age (years)                          | 63.4 ± 9.2                      | 62.2 ± 8.8                | 61.7 ± 8.6                | 61.6 ± 8.4                | < 0.0001    |
| Female, n (%)                        | 1110 (27.9)                     | 1048 (26.4)               | 922 (23.2)                | 897 (22.6)                |             |
| Body mass index (kg/m <sup>2</sup> ) | 22.3 ± 2.8                      | 24.2 ± 3.8                | 25.5 ± 3.2                | 27.9 ± 7.5                | < 0.0001    |
| Waist circumference (cm)             | 75.6 ± 8.5                      | 81.4 ± 7.9                | 85.5 ± 8.3                | 91.6 ± 9.2                | < 0.0001    |
| Systolic blood pressure (mmHg)       | 132.6 ± 18.0                    | 133.4 ± 17.3              | 136.0 ± 17.2              | 137.0 ± 16.4              | < 0.0001    |
| Diastolic blood pressure (mmHg)      | 74.2 ± 9.5                      | 75.7 ± 9.3                | 77.2 ± 9.2                | 78.0 ± 9.8                | < 0.0001    |
| Current smoking, n (%)               | 196 (13.0)                      | 279 (17.8)                | 346 (21.9)                | 393 (24.2)                | < 0.0001    |
| Current drinking, n (%)              | 151 (10)                        | 195 (12.4)                | 256 (16.2)                | 290 (17.9)                | < 0.0001    |
| Physical activity (MET-h/wk)         | 21.0 (6.0-21.0)                 | 15.3 (3.0-21.0)           | 15.0 (3.0-21.0)           | 15.0 (3.0-21.0)           | 0.30        |
| Fasting plasma glucose (mmol/L)      | 5.99 ± 1.36                     | 6.06 ± 1.34               | 6.21 ± 1.57               | 6.28 ± 1.61               | < 0.0001    |
| HOMA-IR                              | 1.42 (0.99-2.15)                | 1.75 (1.20-2.57)          | 1.95 (1.35-2.86)          | 2.43 (1.69-3.55)          | < 0.0001    |
| Total cholesterol (mmol/L)           | 5.28 ± 0.95                     | 5.31 ± 0.98               | 5.26 ± 1.04               | 5.24 ± 1.08               | 0.20        |
| LDL-C (mmol/L)                       | 3.56 ± 0.75                     | 3.62 ± 0.77               | 3.62 ± 0.83               | 3.63 ± 0.81               | 0.02        |
| HDL-C (mmol/L)                       | 1.42 ± 0.33                     | 1.35 ± 0.29               | 1.31 ± 0.29               | 1.27 ± 0.27               | < 0.0001    |

|                                    |                  |                  |                  |                  |          |
|------------------------------------|------------------|------------------|------------------|------------------|----------|
| Triglycerides (mmol/L)             | 1.33 (0.98-1.84) | 1.49 (1.07-2.12) | 1.58 (1.12-2.25) | 1.66 (1.19-2.30) | < 0.0001 |
| C-reactive protein (mg/L)          | 0.19 (0.14-0.28) | 0.21 (0.16-0.31) | 0.23(0.17-0.35)  | 0.25(0.18-0.39)  | < 0.0001 |
| CIMT (mm)                          | 0.69 ± 0.16      | 0.70 ± 0.15      | 0.70 ± 0.14      | 0.72 ± 0.14      | < 0.0001 |
| Insulin resistance, n (%)          | 203 (13.5)       | 313 (20.0)       | 410 (26.0)       | 655 (40.5)       | < 0.0001 |
| Hypertension, n (%)                | 747 (49.5)       | 862 (52.7)       | 978 (61.9)       | 1108 (68.3)      | < 0.0001 |
| Diabetes, n (%)                    | 368 (24.7)       | 403 (25.9)       | 457 (29.2)       | 533 (33.2)       | < 0.0001 |
| Subclinical atherosclerosis, n (%) | 472 (31.3)       | 541 (34.5)       | 555 (35.1)       | 590 (36.3)       | 0.0035   |

Data are presented as means ± standard deviation (SD), or medians (inter-quartile ranges) for skewed variables, or number (proportions) for categorical variables. *P* values were calculated from one-way analysis of variance (ANOVA) for continuous variables and chi-square test for categorical variables. Subclinical atherosclerosis was defined as CIMT ≥ 0.8 mm, which is the cut-off point for the highest quartile of the total participants. Insulin resistance was defined as HOMA-IR ≥ 2.8, which is the cut-off point for the highest quartile of the total participants. Abbreviations: MET, metabolic equivalent task; LDL-C, low-density lipoprotein cholesterol; HDL-C, high-density lipoprotein cholesterol; CIMT, carotid intima-media thickness; HOMA-IR indicates homeostasis model assessment of insulin resistance.

**Table 2. Logistic regression analysis of risk of cardiometabolic disorders in relation to mid-upper arm circumference in total and sex-specific participants**

|                      |         | OR (95% CI) |                  |                  |                  |                  | P for trend |
|----------------------|---------|-------------|------------------|------------------|------------------|------------------|-------------|
|                      |         | Quartile 1  | Quartile 2       | Quartile 3       | Quartile 4       | 1-SD (3.13 cm)   |             |
| <b>Total cohort</b>  |         |             |                  |                  |                  |                  |             |
| Central obesity      | Model 1 | 1.00        | 1.43 (0.99-2.05) | 3.44 (2.45-4.82) | 7.25 (5.12-10.3) | 2.05 (1.85-2.28) | < 0.0001    |
|                      | Model 2 | 1.00        | 1.43 (0.99-2.05) | 3.44 (2.45-4.82) | 7.25 (5.12-10.3) | 2.05 (1.85-2.28) | < 0.0001    |
| Diabetes             | Model 1 | 1.00        | 1.00 (0.82-1.21) | 1.13 (0.93-1.37) | 1.26 (1.02-1.55) | 1.09 (1.02-1.16) | 0.02        |
|                      | Model 2 | 1.00        | 0.87 (0.73-1.06) | 0.89 (0.73-1.10) | 0.87 (0.70-1.09) | 0.96 (0.90-1.04) | 0.33        |
| Hypertension         | Model 1 | 1.00        | 1.04 (0.87-1.24) | 1.57 (1.30-1.89) | 1.65 (1.34-2.04) | 1.21 (1.14-1.30) | < 0.0001    |
|                      | Model 2 | 1.00        | 0.92 (0.77-1.10) | 1.29 (1.06-1.56) | 1.23 (0.98-1.53) | 1.10 (1.03-1.19) | 0.006       |
| Hypertriglyceridemia | Model 1 | 1.00        | 1.55 (1.25-1.92) | 1.78 (1.43-2.21) | 1.92 (1.53-2.41) | 1.24 (1.15-1.35) | < 0.0001    |
|                      | Model 2 | 1.00        | 1.31 (1.05-1.63) | 1.32 (1.05-1.66) | 1.19 (0.93-1.54) | 1.03 (0.94-1.13) | 0.28        |
| Low HDL cholesterol  | Model 1 | 1.00        | 1.40 (1.06-1.84) | 1.80 (1.38-2.35) | 2.06 (1.57-2.69) | 1.26 (1.16-1.37) | < 0.0001    |
|                      | Model 2 | 1.00        | 1.21 (0.91-1.60) | 1.41 (1.06-1.86) | 1.38 (1.02-1.88) | 1.10 (1.01-1.22) | 0.03        |
| <b>Women</b>         |         |             |                  |                  |                  |                  |             |
| Central obesity      | Model 1 | 1.00        | 1.49 (1.04-2.15) | 3.54 (2.50-4.99) | 7.10 (4.97-10.2) | 2.01 (1.81-2.25) | < 0.0001    |
|                      | Model 2 | 1.00        | 1.49 (1.04-2.15) | 3.54 (2.50-4.99) | 7.10 (4.97-10.2) | 2.01 (1.81-2.25) | < 0.0001    |
| Diabetes             | Model 1 | 1.00        | 1.11 (0.89-1.41) | 1.29 (1.01-1.65) | 1.39 (1.07-1.80) | 1.12 (1.03-1.22) | 0.007       |
|                      | Model 2 | 1.00        | 0.98 (0.77-1.24) | 1.03 (0.80-1.32) | 0.97 (0.73-1.29) | 0.99 (0.91-1.09) | 0.93        |

|                      |         |      |                  |                  |                  |                  |          |
|----------------------|---------|------|------------------|------------------|------------------|------------------|----------|
| Hypertension         | Model 1 | 1.00 | 1.10 (0.89-1.35) | 1.93 (1.54-2.44) | 1.80 (1.39-2.33) | 1.27 (1.17-1.38) | < 0.0001 |
|                      | Model 2 | 1.00 | 0.96 (0.78-1.18) | 1.55 (1.23-1.97) | 1.29 (0.98-1.68) | 1.14 (1.05-1.24) | 0.003    |
| Hypertriglyceridemia | Model 1 | 1.00 | 1.63 (1.28-2.01) | 1.89 (1.48-2.42) | 1.84 (1.42-2.38) | 1.25 (1.15-1.37) | < 0.0001 |
|                      | Model 2 | 1.00 | 1.38 (1.08-1.78) | 1.43 (1.09-1.86) | 1.17 (0.87-1.58) | 1.05 (0.94-1.17) | 0.33     |
| Low HDL cholesterol  | Model 1 | 1.00 | 1.67 (1.17-2.38) | 1.94 (1.36-2.77) | 1.87 (1.29-2.71) | 1.21 (1.09-1.35) | 0.0007   |
|                      | Model 2 | 1.00 | 1.47 (1.03-2.21) | 1.56 (1.07-2.28) | 1.32 (0.86-2.01) | 1.08 (0.91-1.23) | 0.23     |
| <b>Men</b>           |         |      |                  |                  |                  |                  |          |
| Central obesity      | Model 1 | 1.00 | 0.38 (0.02-6.61) | 3.99 (0.49-32.0) | 10.4 (1.33-81.2) | 3.08 (1.92-4.95) | < 0.0001 |
|                      | Model 2 | 1.00 | 0.38 (0.02-6.61) | 3.99 (0.49-32.0) | 10.4 (1.33-81.2) | 3.08 (1.92-4.95) | < 0.0001 |
| Diabetes             | Model 1 | 1.00 | 0.79 (0.56-1.10) | 0.85 (0.61-1.18) | 0.97 (0.68-1.38) | 1.01 (0.90-1.13) | 0.84     |
|                      | Model 2 | 1.00 | 0.69 (0.49-0.98) | 0.68 (0.48-0.97) | 0.69 (0.47-1.01) | 0.91 (0.81-1.03) | 0.12     |
| Hypertension         | Model 1 | 1.00 | 0.92 (0.66-1.29) | 1.06 (0.76-1.48) | 1.29 (0.89-1.88) | 1.10 (0.98-1.24) | 0.10     |
|                      | Model 2 | 1.00 | 0.84 (0.60-1.17) | 0.91 (0.65-1.28) | 1.03 (0.70-1.52) | 1.03 (0.91-1.16) | 0.68     |
| Hypertriglyceridemia | Model 1 | 1.00 | 1.37 (0.85-2.21) | 1.46 (0.92-2.31) | 1.66 (1.03-2.67) | 1.13 (0.96-1.32) | 0.04     |
|                      | Model 2 | 1.00 | 1.19 (0.73-1.92) | 1.15 (0.72-1.84) | 1.13 (0.68-1.87) | 0.97 (0.81-1.52) | 0.81     |
| Low HDL cholesterol  | Model 1 | 1.00 | 1.01 (0.65-1.58) | 1.42 (0.94-2.16) | 1.62 (1.04-2.51) | 1.21 (1.06-1.38) | 0.006    |
|                      | Model 2 | 1.00 | 0.92 (0.59-1.44) | 1.22 (0.79-1.86) | 1.27 (0.80-2.01) | 1.12 (0.97-1.29) | 0.13     |

Data were presented as odds ratio (OR) and 95% confidence interval (CI). *P* values were calculated from multivariable logistic regression analysis in quartile of mid-upper arm circumference. Model 1: adjusted for age (years), sex, body mass index (kg/m<sup>2</sup>), current smoking (yes or

1  
2  
3  
4  
5  
6  
7  
8  
9  
10  
11  
12  
13  
14  
15  
16  
17  
18  
19  
20  
21  
22  
23  
24  
25  
26  
27  
28  
29  
30  
31  
32  
33  
34  
35  
36  
37  
38  
39  
40  
41  
42  
43  
44  
45  
46

no), current drinking (yes or no), physical activity (MET-h/wk); Model 2: further adjusted for waist circumference (cm), except for central obesity.

For peer review only

**Table 3. The association of mid-upper arm circumference with subclinical atherosclerosis in total and sex-specific participants**

|                     | OR (95% CI) |                  |                  |                  |                  |                    |
|---------------------|-------------|------------------|------------------|------------------|------------------|--------------------|
|                     | Quartile 1  | Quartile 2       | Quartile 3       | Quartile 4       | 1-SD (3.13 cm)   | <i>P</i> for trend |
| <b>Total cohort</b> |             |                  |                  |                  |                  | 0.20*              |
| Cases/Participants  | 472 / 1510  | 541 / 1570       | 555 / 1582       | 590 / 1625       | 2158 / 6287      |                    |
| Model 1             | 1.00        | 1.16 (1.00-1.34) | 1.19 (1.02-1.38) | 1.25 (1.08-1.45) | 1.06 (1.01-1.12) | 0.004              |
| Model 2             | 1.00        | 1.30 (1.08-1.56) | 1.30 (1.07-1.58) | 1.35 (1.09-1.67) | 1.06 (0.98-1.15) | 0.013              |
| Model 3             | 1.00        | 1.31 (1.09-1.58) | 1.33 (1.10-1.62) | 1.45 (1.16-1.80) | 1.08 (0.99-1.17) | 0.005              |
| <b>Women</b>        |             |                  |                  |                  |                  |                    |
| Case/participants   | 287 / 1110  | 327 / 1048       | 275 / 922        | 282 / 897        | 1171 / 3977      |                    |
| Model 1             | 1.00        | 1.30 (1.08-1.57) | 1.22 (1.00-1.48) | 1.32 (1.09-1.60) | 1.07 (1.00-1.14) | 0.014              |
| Model 2             | 1.00        | 1.54 (1.24-1.93) | 1.43 (1.18-1.82) | 1.53 (1.17-2.02) | 1.11 (1.01-1.23) | 0.007              |
| Model 3             | 1.00        | 1.54 (1.24-1.93) | 1.42 (1.11-1.83) | 1.66 (1.26-2.20) | 1.14 (1.03-1.26) | 0.002              |
| <b>Men</b>          |             |                  |                  |                  |                  |                    |
| Case/participants   | 185 / 400   | 214 / 522        | 280 / 660        | 308 / 728        | 987 / 2310       |                    |
| Model 1             | 1.00        | 0.81 (0.62-1.05) | 0.86 (0.67-1.10) | 0.85 (0.67-1.09) | 0.93 (0.85-1.02) | 0.39               |
| Model 2             | 1.00        | 0.89 (0.64-1.23) | 1.04 (0.75-1.44) | 1.00 (0.70-1.45) | 0.97 (0.85-1.11) | 0.71               |
| Model 3             | 1.00        | 0.90 (0.65-1.25) | 1.06 (0.76-1.48) | 1.05 (0.72-1.52) | 0.99 (0.86-1.06) | 0.54               |

Data were presented as odds ratio (OR) and 95% confidence interval (CI). *P* values were calculated from multivariable logistic regression analysis. \*: the interaction of MUAC with sex on subclinical atherosclerosis. Model 1, unadjusted; Model 2, adjusted for age (years), sex, body



1  
2  
3  
4 mass index (kg/m<sup>2</sup>), current smoking (yes or no), current drinking (yes or no), physical activity (MET-h/wk), waist circumference (cm); Model  
5  
6 3, further adjusted for C-reactive protein (mg/L), total cholesterol (mmol/L), HDL-C (mmol/L), LDL-C (mmol/L), triglycerides (mmol/L),  
7  
8 fasting plasma glucose (mmol/L), and systolic blood pressure (mmHg).  
9  
10  
11  
12  
13  
14  
15  
16  
17  
18  
19  
20  
21  
22  
23  
24  
25  
26  
27  
28  
29  
30  
31  
32  
33  
34  
35  
36  
37  
38  
39  
40  
41  
42  
43  
44  
45  
46

For peer review only

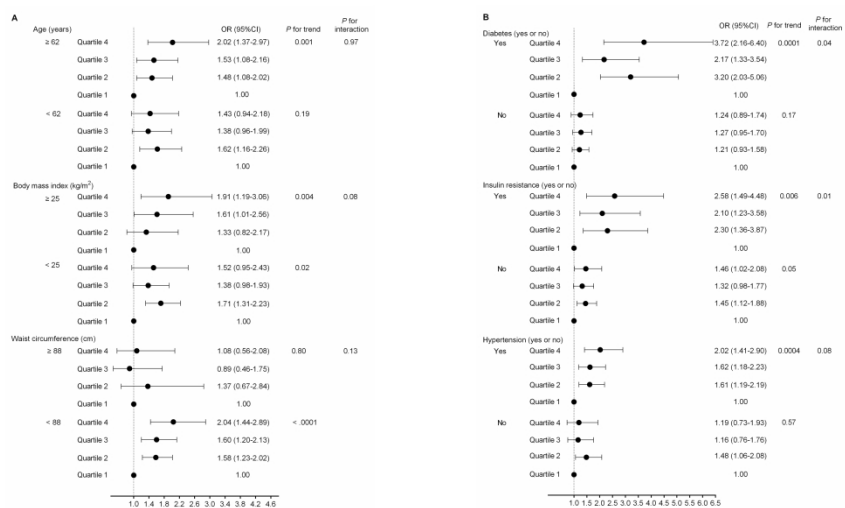

Figure 1

338x190mm (300 x 300 DPI)

1  
2  
3  
4  
5  
6  
7  
8  
9  
10  
11  
12  
13  
14  
15  
16  
17  
18  
19  
20  
21  
22  
23  
24  
25  
26  
27  
28  
29  
30  
31  
32  
33  
34  
35  
36  
37  
38  
39  
40  
41  
42  
43  
44  
45  
46  
47  
48  
49  
50  
51  
52  
53  
54  
55  
56  
57  
58  
59  
60

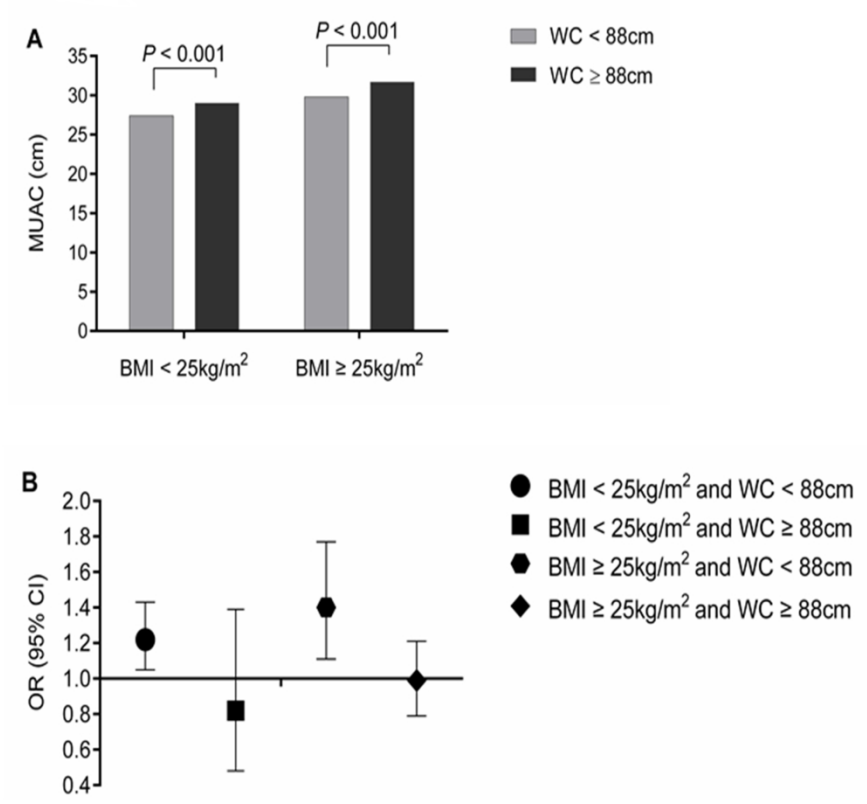

Figure 2

199x176mm (300 x 300 DPI)

STROBE Statement—Checklist of items that should be included in reports of *cross-sectional studies*

|                           | Item No | Recommendation                                                                                                                                                                                    | Page number           |
|---------------------------|---------|---------------------------------------------------------------------------------------------------------------------------------------------------------------------------------------------------|-----------------------|
| <b>Title and abstract</b> | 1       | (a) Indicate the study's design with a commonly used term in the title or the abstract                                                                                                            | Page 1                |
|                           |         | (b) Provide in the abstract an informative and balanced summary of what was done and what was found                                                                                               | Page 3-4              |
| <b>Introduction</b>       |         |                                                                                                                                                                                                   |                       |
| Background/rationale      | 2       | Explain the scientific background and rationale for the investigation being reported                                                                                                              | Page 5-6              |
| Objectives                | 3       | State specific objectives, including any prespecified hypotheses                                                                                                                                  | Page 6                |
| <b>Methods</b>            |         |                                                                                                                                                                                                   |                       |
| Study design              | 4       | Present key elements of study design early in the paper                                                                                                                                           | Page 6                |
| Setting                   | 5       | Describe the setting, locations, and relevant dates, including periods of recruitment, exposure, follow-up, and data collection                                                                   | Page 6-7              |
| Participants              | 6       | (a) Give the eligibility criteria, and the sources and methods of selection of participants                                                                                                       | Page 6-7              |
| Variables                 | 7       | Clearly define all outcomes, exposures, predictors, potential confounders, and effect modifiers. Give diagnostic criteria, if applicable                                                          | Page 6-9              |
| Data sources/measurement  | 8*      | For each variable of interest, give sources of data and details of methods of assessment (measurement). Describe comparability of assessment methods if there is more than one group              | Page 7-9              |
| Bias                      | 9       | Describe any efforts to address potential sources of bias                                                                                                                                         | Page 6-9              |
| Study size                | 10      | Explain how the study size was arrived at                                                                                                                                                         | Page 6-7              |
| Quantitative variables    | 11      | Explain how quantitative variables were handled in the analyses. If applicable, describe which groupings were chosen and why                                                                      | Page 10               |
| Statistical methods       | 12      | (a) Describe all statistical methods, including those used to control for confounding                                                                                                             | Page 9-10             |
|                           |         | (b) Describe any methods used to examine subgroups and interactions                                                                                                                               | Page 10               |
|                           |         | (c) Explain how missing data were addressed                                                                                                                                                       | Page 7                |
|                           |         | (d) If applicable, describe analytical methods taking account of sampling strategy                                                                                                                |                       |
|                           |         | (e) Describe any sensitivity analyses                                                                                                                                                             | Page 10               |
| <b>Results</b>            |         |                                                                                                                                                                                                   |                       |
| Participants              | 13*     | (a) Report numbers of individuals at each stage of study—eg numbers potentially eligible, examined for eligibility, confirmed eligible, included in the study, completing follow-up, and analysed | Page 10<br>Page 22    |
|                           |         | (b) Give reasons for non-participation at each stage                                                                                                                                              |                       |
|                           |         | (c) Consider use of a flow diagram                                                                                                                                                                |                       |
| Descriptive data          | 14*     | (a) Give characteristics of study participants (eg demographic, clinical, social) and information on exposures and potential confounders                                                          | Page 10-11            |
|                           |         | (b) Indicate number of participants with missing data for each variable of interest                                                                                                               |                       |
| Outcome data              | 15*     | Report numbers of outcome events or summary measures                                                                                                                                              | Page 10-11<br>Page 22 |
| Main results              | 16      | (a) Give unadjusted estimates and, if applicable, confounder-adjusted estimates and their precision (eg, 95% confidence interval). Make clear                                                     | Page 11-12            |

|                          |    |                                                                                                                                                                            |            |
|--------------------------|----|----------------------------------------------------------------------------------------------------------------------------------------------------------------------------|------------|
|                          |    | which confounders were adjusted for and why they were included                                                                                                             |            |
|                          |    | (b) Report category boundaries when continuous variables were categorized                                                                                                  | Page 9     |
|                          |    | (c) If relevant, consider translating estimates of relative risk into absolute risk for a meaningful time period                                                           |            |
| Other analyses           | 17 | Report other analyses done—eg analyses of subgroups and interactions, and sensitivity analyses                                                                             | Page 12    |
| <b>Discussion</b>        |    |                                                                                                                                                                            |            |
| Key results              | 18 | Summarise key results with reference to study objectives                                                                                                                   | Page 12-13 |
| Limitations              | 19 | Discuss limitations of the study, taking into account sources of potential bias or imprecision. Discuss both direction and magnitude of any potential bias                 | Page 14-15 |
| Interpretation           | 20 | Give a cautious overall interpretation of results considering objectives, limitations, multiplicity of analyses, results from similar studies, and other relevant evidence | Page 13-14 |
| Generalisability         | 21 | Discuss the generalisability (external validity) of the study results                                                                                                      | Page 15    |
| <b>Other information</b> |    |                                                                                                                                                                            |            |
| Funding                  | 22 | Give the source of funding and the role of the funders for the present study and, if applicable, for the original study on which the present article is based              | Page 16    |

\*Give information separately for exposed and unexposed groups.

**Note:** An Explanation and Elaboration article discusses each checklist item and gives methodological background and published examples of transparent reporting. The STROBE checklist is best used in conjunction with this article (freely available on the Web sites of PLoS Medicine at <http://www.plosmedicine.org/>, Annals of Internal Medicine at <http://www.annals.org/>, and Epidemiology at <http://www.epidem.com/>). Information on the STROBE Initiative is available at [www.strobe-statement.org](http://www.strobe-statement.org).

# BMJ Open

## Association between mid-upper arm circumference and cardiometabolic risk in Chinese population: a cross-sectional study

|                                 |                                                                                                                                                                                                                                                                                                                                                                                                                                                                                                                                                                                                                                                                                                                                                                                                                                                                                                                                                                                                                                                                                                                                                                                                                                                                                                                                                                                                                                                                                                 |
|---------------------------------|-------------------------------------------------------------------------------------------------------------------------------------------------------------------------------------------------------------------------------------------------------------------------------------------------------------------------------------------------------------------------------------------------------------------------------------------------------------------------------------------------------------------------------------------------------------------------------------------------------------------------------------------------------------------------------------------------------------------------------------------------------------------------------------------------------------------------------------------------------------------------------------------------------------------------------------------------------------------------------------------------------------------------------------------------------------------------------------------------------------------------------------------------------------------------------------------------------------------------------------------------------------------------------------------------------------------------------------------------------------------------------------------------------------------------------------------------------------------------------------------------|
| Journal:                        | <i>BMJ Open</i>                                                                                                                                                                                                                                                                                                                                                                                                                                                                                                                                                                                                                                                                                                                                                                                                                                                                                                                                                                                                                                                                                                                                                                                                                                                                                                                                                                                                                                                                                 |
| Manuscript ID                   | bmjopen-2019-028904.R2                                                                                                                                                                                                                                                                                                                                                                                                                                                                                                                                                                                                                                                                                                                                                                                                                                                                                                                                                                                                                                                                                                                                                                                                                                                                                                                                                                                                                                                                          |
| Article Type:                   | Research                                                                                                                                                                                                                                                                                                                                                                                                                                                                                                                                                                                                                                                                                                                                                                                                                                                                                                                                                                                                                                                                                                                                                                                                                                                                                                                                                                                                                                                                                        |
| Date Submitted by the Author:   | 04-Jul-2019                                                                                                                                                                                                                                                                                                                                                                                                                                                                                                                                                                                                                                                                                                                                                                                                                                                                                                                                                                                                                                                                                                                                                                                                                                                                                                                                                                                                                                                                                     |
| Complete List of Authors:       | Hou, Yanan; Shanghai Jiao Tong University Medical School Affiliated Ruijin Hospital<br>Jia, Xu; Shanghai Jiao Tong University Medical School Affiliated Ruijin Hospital<br>Xuan, Liping; Shanghai Jiao Tong University Medical School Affiliated Ruijin Hospital<br>Zhu, Wen; Shanghai Jiao Tong University Medical School Affiliated Ruijin Hospital<br>Deng, Chanjuan; Shanghai Jiao Tong University Medical School Affiliated Ruijin Hospital<br>Wang, Long; Shanghai Jiao Tong University Medical School Affiliated Ruijin Hospital<br>Zhao, Zhiyun; Shanghai Jiao Tong University Medical School Affiliated Ruijin Hospital<br>Li, Mian; Shanghai Jiao Tong University Medical School Affiliated Ruijin Hospital<br>Lu, Jieli; Rui-Jin Hospital, Shanghai Jiao-Tong University School of Medicine, Department of Endocrine and Metabolic Diseases<br>Xu, Yu; Shanghai Jiao Tong University Medical School Affiliated Ruijin Hospital<br>Chen, Yuhong; Shanghai Jiao Tong University Medical School Affiliated Ruijin Hospital<br>Wang, Weiqing; Shanghai Jiao Tong University Medical School Affiliated Ruijin Hospital<br>Bi, Yufang; Rui-Jin Hospital, Shanghai Jiao-Tong University School of Medicine, Department of Endocrine and Metabolic Diseases<br>Xu, Min; Rui-Jin Hospital, Shanghai Jiao-Tong University School of Medicine, Shanghai Institute of Endocrine and Metabolic Diseases<br>Wang, Tiange; Shanghai Jiao Tong University Medical School Affiliated Ruijin Hospital, |
| <b>Primary Subject Heading</b>: | Epidemiology                                                                                                                                                                                                                                                                                                                                                                                                                                                                                                                                                                                                                                                                                                                                                                                                                                                                                                                                                                                                                                                                                                                                                                                                                                                                                                                                                                                                                                                                                    |
| Secondary Subject Heading:      | Diabetes and endocrinology, Cardiovascular medicine                                                                                                                                                                                                                                                                                                                                                                                                                                                                                                                                                                                                                                                                                                                                                                                                                                                                                                                                                                                                                                                                                                                                                                                                                                                                                                                                                                                                                                             |
| Keywords:                       | cardiometabolic risk, mid-upper arm circumference, subclinical atherosclerosis, upper body fat, Chinese adults                                                                                                                                                                                                                                                                                                                                                                                                                                                                                                                                                                                                                                                                                                                                                                                                                                                                                                                                                                                                                                                                                                                                                                                                                                                                                                                                                                                  |

1  
2  
3  
4  
5  
6  
7  
8  
9  
10  
11  
12  
13  
14  
15  
16  
17  
18  
19  
20  
21  
22  
23  
24  
25  
26  
27  
28  
29  
30  
31  
32  
33  
34  
35  
36  
37  
38  
39  
40  
41  
42  
43  
44  
45  
46  
47  
48  
49  
50  
51  
52  
53  
54  
55  
56  
57  
58  
59  
60



SCHOLARONE™  
Manuscripts

1 **Association between mid-upper arm circumference and cardiometabolic risk in**  
2  
3  
4  
5 **Chinese population: a cross-sectional study**  
6  
7

8  
9 3

10 **Running title: Upper body fat and cardiometabolic risk**  
11  
12  
13  
14  
15 5

16  
17  
18 Yanan Hou<sup>1</sup>, Xu Jia<sup>1</sup>, Liping Xuan<sup>1</sup>, Wen Zhu<sup>1</sup>, Chanjuan Deng<sup>1</sup>, Long Wang<sup>1</sup>, Zhiyun  
19  
20 Zhao<sup>1</sup>, Mian Li<sup>1</sup>, Jieli Lu<sup>1</sup>, Yu Xu<sup>1</sup>, Yuhong Chen<sup>1</sup>, Weiqing Wang<sup>1</sup>, Yufang Bi<sup>1</sup>, Min  
21  
22 Xu<sup>1</sup>, Tiange Wang<sup>1¶</sup>  
23  
24  
25

26  
27 9

28  
29 <sup>1</sup>Shanghai National Clinical Research Center for Endocrine and Metabolic Diseases,  
30  
31 Key Laboratory for Endocrine and Metabolic Diseases of the National Health  
32  
33 Commission of the PR China, Shanghai Institute of Endocrine and Metabolic Diseases,  
34  
35 Ruijin Hospital, Shanghai Jiao Tong University School of Medicine, Shanghai, China.  
36  
37  
38

39  
40 14

41  
42 **¶Corresponding author:**  
43  
44

45  
46 Tiange Wang, MD, PhD, Shanghai National Clinical Research Center for Endocrine  
47  
48 and Metabolic Diseases, Key Laboratory for Endocrine and Metabolic Diseases of the  
49  
50 National Health Commission of the PR China, Shanghai Institute of Endocrine and  
51  
52 Metabolic Diseases, Ruijin Hospital, Shanghai Jiao Tong University School of  
53  
54 Medicine, Shanghai, China. Telephone: 86-21-64370045; Fax: 86-21-64749885; E-mail:  
55  
56 [wtg@live.cn](mailto:wtg@live.cn).  
57  
58  
59  
60



1  
2  
3 **22 Abstract**  
4  
5

6 **23 Objectives:** Upper body fat has been associated with an unfavorable cardiometabolic  
7  
8 **24 risk.** We aimed to investigate the associations between mid-upper arm circumference  
9  
10 **25 (MUAC),** a novel indicator of upper body fat, and a wide spectrum of cardiometabolic  
11  
12 **26 risk profiles** in Chinese population.  
13  
14

15  
16 **27 Design and setting:** Cross-sectional analyses were performed using data from a well-  
17  
18 **28 defined community** in 2014, Shanghai, China.  
19  
20

21  
22 **29 Participants:** A total of 6287 Chinese adults (2310 men and 3977 women) aged 40  
23  
24 **30 years or older.**  
25  
26

27 **31 Outcome measures:** Multivariable logistic regression model was used to examine the  
28  
29 **32 associations of MUAC** with cardiometabolic disorders including central obesity,  
30  
31 **33 diabetes,** hypertension, hypertriglyceridemia, low high-density lipoprotein (HDL)  
32  
33 **34 cholesterol,** and subclinical atherosclerosis.  
34  
35

36  
37 **35 Results:** In the overall participants, after multivariable adjustment, each 1-SD (3.13 cm)  
38  
39 **36 increment in MUAC** was positively associated with central obesity (OR, 2.05; 95% CI,  
40  
41 **37 1.85-2.28),** hypertension (OR, 1.10; 95% CI, 1.03-1.19), and low HDL cholesterol (OR,  
42  
43 **38 1.10; 95% CI, 1.01-1.22).** Multivariable-adjusted ORs for subclinical atherosclerosis  
44  
45 **39 were gradually increased** across increasing quartiles of MUAC with the lowest quartile  
46  
47 **40 as reference** (quartile 2: OR, 1.31; 95% CI, 1.09-1.58; quartile 3: 1.33; 1.10-1.62;  
48  
49 **41 quartile 4: 1.45; 1.16-1.80;** P for trend = 0.005). Similar but more prominent  
50  
51 **42 associations** were observed among women than men. In addition, MUAC was  
52  
53 **43 significantly interacted** with diabetes (P for interaction = 0.04) and insulin resistance (P  
54  
55 **44 for interaction = 0.01)** on subclinical atherosclerosis.  
56  
57  
58  
59  
60

1  
2  
3 45 **Conclusion:** A greater MUAC was positively associated with higher risks of several  
4  
5 46 cardiometabolic disorders and subclinical atherosclerosis in Chinese adults.  
6  
7

8  
9 47

10  
11 48 **Keywords:** Cardiometabolic risk, mid-upper arm circumference, subclinical  
12  
13 49 atherosclerosis, upper body fat, Chinese adults  
14  
15

16  
17 50

18  
19  
20 51 **Strengths and limitations of this study:**  
21

22  
23 52 • The strengths of this study included a well-defined community setting, a fair sized  
24  
25 53 sample size, and comprehensive measurements of cardiometabolic risk profiles.  
26  
27

28  
29 54 • The thorough analyses of the associations between MUAC and a wide spectrum of  
30  
31 55 cardiometabolic risk profiles including central obesity, diabetes, hypertension,  
32  
33 56 hypertriglyceridemia, low HDL cholesterol, and subclinical atherosclerosis.  
34  
35

36  
37 57 • Although our findings support that MUAC could be a reliable surrogate of upper body  
38  
39 58 adiposity, MUAC is a measurement which reflect both adipose and lean tissue rather  
40  
41 59 than a direct indicator for adiposity.  
42  
43

44  
45 60 • Age-related changes in body composition might influence these findings.  
46  
47

48  
49 61 • This study was restricted to middle-aged and elderly Chinese adults, and the  
50  
51 62 generalizability of our findings should be cautious to other demographic and ethnic  
52  
53 63 populations.  
54  
55  
56  
57  
58  
59  
60

## 64 **Introduction**

65 Cardiometabolic disorders describe a spectrum of interconnected pathological  
66 alterations in the cardiovascular system and metabolic organs that symbiotically  
67 increase the risk of cardiovascular disease (CVD), which is a major cause of mortality  
68 and increasing burden of healthcare expenditure worldwide.<sup>1-5</sup> Several important  
69 cardiometabolic disorders, including obesity, diabetes, insulin resistance, dyslipidemia,  
70 and hypertension, are important risk factors for CVD and could be served as targets for  
71 early identification and personalized prevention for CVD.<sup>2-5</sup> In addition, as a common  
72 contributor of CVD, atherosclerosis goes through a protracted subclinical phase and  
73 could only be detected at an advanced stage of CVD.<sup>6,7</sup> Thus, identification of  
74 subclinical atherosclerosis in the asymptomatic period is also critical for the prevention  
75 of CVD progression. Noninvasive ultrasonography measured carotid intima media  
76 thickness (CIMT) is a well-established clinical index for early arteriosclerosis detection  
77 and therefore has been extensively adopted to measure subclinical atherosclerosis.<sup>8</sup>

78 Fat distribution, specifically upper body and visceral adiposity, has been proven  
79 highly relevant to cardiovascular risk.<sup>9,10</sup> In addition to the conventional body fat  
80 indices such as body mass index (BMI) and waist circumference (WC), mid-upper arm  
81 circumference (MUAC), a novel anthropometric measurement, has been widely used in  
82 the screening of malnutrition, adiposity and chronic diseases.<sup>11</sup> However, current  
83 epidemiological studies have revealed inconsistent results with regard to the association  
84 between MUAC and cardiometabolic risk. A cross-sectional study using data from the  
85 National Health and Nutrition Examination Survey (NHANES) 1999 to 2006 circles has  
86 reported a positive association between MUAC and insulin resistance in non-obese  
87 individuals but no significant association in obese individuals.<sup>9</sup> In a prospective cohort

1  
2  
3 88 study of 1061 European elderly participants with a follow-up of approximately 6 years,  
4  
5 89 a larger MUAC was associated with elevated risks of all-cause or CVD mortality.<sup>12</sup> By  
6  
7 90 contrast, in the Canada Fitness Survey of 10638 adults, a larger MUAC was  
8  
9 91 independently associated with a lower risk of all-cause mortality.<sup>13</sup> And such inverse  
10  
11 92 association between a larger MUAC and a lower risk of mortality was also documented  
12  
13 93 in the British National Diet and Nutrition Survey of 1054 participants with more than 15  
14  
15 94 years of follow-up.<sup>14</sup>

16  
17  
18  
19  
20 95 So far, most of the previous studies were conducted in European population.  
21  
22 96 Chinese population tend to have a higher percentage of body fat, a weaker willingness  
23  
24 97 on body build, and less muscle mass as well as connective tissue as compared with their  
25  
26 98 European counterparts.<sup>15</sup> These different features in body composition may translate  
27  
28 99 into varying susceptibilities to adiposity related cardiometabolic disorders. However,  
29  
30 100 comprehensive analyses on associations between MUAC and cardiovascular risk  
31  
32 101 profiles in Chinese population are still limited. Therefore, this study aimed to  
33  
34 102 investigate the association between MUAC and multiple cardiometabolic disorders as  
35  
36 103 well as subclinical atherosclerosis in Chinese population.  
37  
38  
39  
40  
41  
42  
43  
44

## 45 105 **Methods**

### 46 47 48 106 **Study population**

49  
50  
51 107 This is a cross-sectional analysis based on one of the follow-up circles of the established  
52  
53 108 community-based cohort.<sup>16,17</sup> Eligible participants aged 40 years or older were  
54  
55 109 identified from the local residence registration records. There was no restriction on  
56  
57 110 ethnicity or gender. Each eligible participant was recruited by trained community staff  
58  
59  
60

1  
2  
3 111 and local health workers using a door-to-door invitation method. Participants who  
4  
5 112 consented for the study and signed informed consent were scheduled for health  
6  
7 113 examinations. Briefly, a total of 6570 participants aged 40 years or older were enrolled  
8  
9 114 from Jiading district, Shanghai, China, from August 2014 to May 2015. All participants  
10  
11 115 received anthropometric measurements including height, weight, WC, and MUAC, a  
12  
13 116 standard 75-g oral glucose tolerance test (OGTT), and a standard questionnaire to  
14  
15 117 collect information regarding social demographic characteristics, education attainment,  
16  
17 118 lifestyle factors, and history of disease and medicine. Blood samples were collected for  
18  
19 119 biochemical measurements. In the present study, 283 participants were excluded due to  
20  
21 120 missing data on MUAC or CIMT, and a total of 6287 participants were included in the  
22  
23 121 final analysis. This study was approved by the Institutional Review Board of Ruijin  
24  
25 122 Hospital Affiliated to Shanghai Jiao Tong University School of Medicine. Written  
26  
27 123 informed consents were obtained from all study participants.  
28  
29  
30  
31  
32  
33  
34  
35  
36

### 37 125 **Data collection and biochemical measurements**

38  
39  
40 126 Detailed information on sociodemographic characteristics, education attainment, and  
41  
42 127 lifestyle factors including smoking and alcohol drinking habits and physical activity,  
43  
44 128 family history, and medical history were obtained by using a standard questionnaire  
45  
46 129 administered by trained personnel. Current smokers or alcohol drinkers were defined as  
47  
48 130 persons who consumed any kinds of cigarettes or alcohol regularly in the past 6 months,  
49  
50 131 respectively. Physical activity in term of metabolic equivalent (MET) hour/week was  
51  
52 132 calculated according to the short form of the International Physical Activity  
53  
54 133 Questionnaire including physical activities both during leisure time and at work.<sup>18</sup>  
55  
56  
57  
58  
59  
60

1  
2  
3 134 Anthropometric measurements including height, weight, WC, and MUAC were  
4  
5 135 assessed by well-trained physician according to a standard protocol. Body height and  
6  
7 136 weight were measured with participants wearing light clothes without shoes to the  
8  
9  
10 137 nearest 0.1 centimeter and 0.1 kg, respectively. BMI was calculated as body weight in  
11  
12 138 kilograms divided by body height in meters squared ( $\text{kg}/\text{m}^2$ ). MUAC was measured on  
13  
14 139 the upper left arm (halfway between the acromion process and the olecranon process)  
15  
16 140 with the participants' bilateral arms hanging down naturally.<sup>19</sup> WC was measured at the  
17  
18 141 level of the umbilicus with the participants in the standing position. Systolic and  
19  
20 142 diastolic blood pressures were measured in the non-dominant arm with an automated  
21  
22 143 electronic sphygmomanometer (OMRON Model HEM-752 FUZZY, Omron Company,  
23  
24 144 Dalian, China) three times (averaged for analysis) consecutively with 1 min interval  
25  
26 145 after at least 5 min rest in a seated position.

30  
31 146 All participants were undertaken a 75-g OGTT after an overnight fasting. Fasting  
32  
33 147 plasma glucose and OGTT 2-hour plasma glucose were measured using hexokinase  
34  
35 148 method on a clinical chemistry diagnostic system (Modular P800; Roche, Basel,  
36  
37 149 Switzerland). Serum concentrations of total cholesterol, triglycerides, high-density  
38  
39 150 lipoprotein (HDL) cholesterol and low-density lipoprotein (LDL) cholesterol were  
40  
41 151 measured by an autoanalyzer (Modular E170; Roche). High sensitive C-reactive protein  
42  
43 152 concentration was determined by highly sensitive competitive immunoassay (antigens  
44  
45 153 and antibodies from Beckman coulter IMMAGE800, America). Serum insulin was  
46  
47 154 measured by using the electrochemiluminescence methods on an Immunology analyzer  
48  
49 155 (RIABEAD II; Abbott, Tokyo, Japan). Homeostasis model assessment of insulin  
50  
51 156 resistance (HOMA-IR) was calculated as fasting insulin ( $\mu\text{IU}/\text{mL}$ )  $\times$  fasting plasma  
52  
53 157 glucose ( $\text{mmol}/\text{L}$ ) / 22.5, and insulin resistance was defined as  $\text{HOMA-IR} \geq 2.8$ , which  
54  
55 158 is the cut-off point for the highest quartile of the total participants.  
56  
57  
58  
59  
60

159

**160 Definitions of cardiometabolic risk profile**

161 Type 2 diabetes was defined as fasting plasma glucose  $\geq 7.0$  mmol/L or OGTT 2-hour  
162 plasma glucose  $\geq 11.1$  mmol/L or use of anti-diabetic agents.<sup>20</sup> Hypertension was  
163 defined as systolic blood pressure  $\geq 140$  mmHg, diastolic blood pressure  $\geq 90$  mmHg or  
164 current taking an antihypertensive medication. Central obesity was defined as WC  $\geq 102$   
165 cm for men and  $\geq 88$  cm for women. Hypertriglyceridemia was defined as triglycerides  
166  $\geq 2.26$  mmol/L. Low HDL cholesterol was defined as a level of HDL cholesterol  $< 1.04$   
167 mmol/L.

168 CIMT measurement was conducted by a trained sonographer using a high-  
169 resolution B-mode tomographic ultrasound system (Esaote Biomedica SpA, Genoa,  
170 Italy) with a linear 7.5 MHz transducer.<sup>21</sup> The position of CIMT measurement was  
171 recorded on the far wall of both right and left common carotid arteries, 1.5 cm proximal  
172 to the bifurcation. CIMT was measured on-line at the end of diastole as a distance from  
173 the leading edge of the first echogenic line to that of the second. These two lines  
174 represent the lumen-intima interface and collagen-contained upper layer of tunica  
175 adventitia, respectively. Subclinical atherosclerosis was defined as a bilateral CIMT  
176 average greater than 0.8 mm, which is the highest quartile cut-off point of the total  
177 participants.

178

**179 Statistical analyses**

180 SAS version 9.4 (SAS Institute Inc, Cary, NC, USA) was used for statistical analysis.  
181 Continuous variables were described as means  $\pm$  standard deviations (SDs) or medians

182 (interquartile ranges), and categorical variables as numbers (percentages). Variables  
183 with skewed distributions, such as HOMA-IR, triglycerides, and C-reactive protein,  
184 were normalized by logarithmic transformation before analysis.

185 Participants were divided into four subgroups according to quartiles of MUAC.  
186 The ranges of MUAC within each quartile were 15.5 to 27.1 cm for quartile 1, 27.2 to  
187 29.1 cm for quartile 2, 29.2 to 31.2 cm for quartile 3, and 31.3 to 43.3 cm for quartile 4.  
188 Linear regression analysis was used to test the trend of continuous variables across  
189 MUAC quartiles and the Cochran-Armitage trend chi-square test was used to test the  
190 differences of proportions of categorical variables. Multivariable linear regression and  
191 multivariable logistic regression analyses were conducted to assess the associations of  
192 MUAC with multiple cardiometabolic disorders and subclinical atherosclerosis, with  
193 adjustment for age, sex, BMI, WC, current smoking, current drinking, physical activity,  
194 C-reactive protein, total cholesterol, HDL cholesterol, LDL cholesterol, triglycerides,  
195 fasting plasma glucose, and systolic blood pressure. Stratification analyses by age, BMI,  
196 WC, diabetes, insulin resistance, and hypertension were also performed. Interactions  
197 were tested by adding the respective multiplicative terms in the models simultaneously.  
198 Statistical significance was set to a two-sided *P* value of less than 0.05.

199

## 200 **Patient and public involvement**

201 This study was conducted without patient and public involvement. No patients were  
202 invited to take part in the development of the research question and outcome  
203 measures, the study design and the interpretation of the results. The findings from this  
204 study will be disseminated to the participants after the results are published in a peer-  
205 reviewed journal.



206

## 207 **Results**

### 208 **Characteristics of the study participants**

209 Study participants included 2310 (36.7%) men and 3977 (63.3%) women with an  
210 average age of 62.2 years (SD: 8.78). Sociodemographic and clinical characteristics of  
211 the study participants according to MUAC quartiles are shown in Table 1. Participants  
212 with a large MUAC were younger, had higher levels of BMI, WC, systolic and diastolic  
213 blood pressures, fasting plasma glucose, HOMA-IR, LDL cholesterol, triglycerides, C-  
214 reactive protein, and CIMT, had higher proportions of insulin resistance, hypertension,  
215 diabetes, and subclinical atherosclerosis, and had lower levels of HDL cholesterol (all *P*  
216 values < 0.05; Table 1). Consistent linear associations were observed between MUAC  
217 and these cardiometabolic profiles (Supplemental Table 1).

218

### 219 **Association between MUAC and cardiometabolic disorders**

220 As shown in Table 2, the multivariable-adjusted OR per 1-SD increment (3.13 cm) in  
221 MUAC was 2.05 (95% CI, 1.85-2.28) for central obesity, 1.09 (1.02-1.16) for diabetes,  
222 1.21 (1.14-1.30) for hypertension, 1.24 (1.15-1.35) for hypertriglyceridemia, and 1.26  
223 (1.16-1.37) for low HDL cholesterol. Most of these associations were not substantially  
224 changed after additional adjustment for WC, except for diabetes and  
225 hypertriglyceridemia. When stratified by sex, similar but more prominent associations  
226 between MUAC and these cardiometabolic disorders were observed among women.

227

## 228 **Association between MUAC and subclinical atherosclerosis**

229 In total participants, we observed strong and positive association between MUAC and  
230 subclinical atherosclerosis with fully adjustment (Table 3). The OR for subclinical  
231 atherosclerosis was 1.31 (95% CI, 1.09-1.58) for quartile 2 of MUAC, 1.33 (95% CI,  
232 1.10-1.62) for quartile 3, and 1.45 (95% CI, 1.16-1.80) for quartile 4 as compared with  
233 the lowest quartile (P for trend = 0.005). When stratified by sex, statistically significant  
234 results were observed among women but not among men.

## 236 **Stratification analyses by traditional cardiovascular risk factors**

237 We further examined the association between MUAC and subclinical atherosclerosis  
238 across strata of traditional cardiometabolic risk factors. In women, MUAC was  
239 associated with subclinical atherosclerosis among participants who aged  $\geq 62$  years,  
240 with BMI  $\geq 25$  kg/m<sup>2</sup> or waist circumference  $< 88$  cm (Figure 1A), and among  
241 participants with diabetes, insulin resistance, or hypertension (Figure 1B). Moreover,  
242 there were significant interactions of MUAC with diabetes and insulin resistance on  
243 subclinical atherosclerosis (P for interaction = 0.04 and 0.01, respectively). These  
244 association patterns were not observed in men (Supplementary Figure 1).

245 To further evaluate whether the association of MUAC with subclinical  
246 atherosclerosis is influenced by BMI and WC, we replicated the analyses within  
247 combinations of BMI and WC. In women, those with higher WC were more likely to  
248 have larger MUAC, regardless of BMI levels (Figure 2A). And MUAC was  
249 independently associated with subclinical atherosclerosis in the combination of WC  $<$

1  
2  
3 250 88 cm and BMI < 25 kg/m<sup>2</sup> (OR, 1.22; 95% CI, 1.05-1.43) and the combination of WC  
4  
5 251 < 88 cm and BMI ≥ 25 kg/m<sup>2</sup> (OR, 1.40; 95% CI, 1.11-1.77) (Figure 2B).  
6  
7  
8  
9 252

## 10 11 253 **Discussion**

12  
13  
14  
15 254 In this cross-sectional study of 6287 community dwelling Chinese adults, MUAC was  
16  
17 255 positively associated with a series of cardiometabolic disorders including central obesity,  
18  
19 256 hypertension, low HDL cholesterol, and subclinical atherosclerosis. These associations  
20  
21 257 were independent from traditional cardiovascular risk factors, and were more prominent  
22  
23  
24 258 in women. Moreover, we observed significant interactions of MUAC with diabetes and  
25  
26 259 insulin resistance in relation to subclinical atherosclerosis.  
27  
28

29  
30 260 MUAC has been accepted as a widely used indicator of upper body adiposity in  
31  
32 261 children, adolescents, and adults.<sup>22, 23</sup> Previous studies have shown mixed results on the  
33  
34 262 associations between MUAC and CVD.<sup>24-27</sup> Findings from a retrospective cohort study  
35  
36 263 of 771 Japanese adults have suggested that MUAC may play a complementary role to  
37  
38 264 BMI in predicting prognosis in patients with heart failure.<sup>24</sup> In addition, a cross-  
39  
40 265 sectional study of 93 pubertal obese adolescents from Brazil have associated a larger  
41  
42 266 MUAC with a higher level of HOMA-IR and a higher cardiometabolic risk score.<sup>25</sup> On  
43  
44 267 the contrary, results from the Health Effects of Arsenic Longitudinal Study of 562  
45  
46 268 middle-aged participants who were free of CVD in rural Bangladesh have shown no  
47  
48 269 relationship between MUAC and CIMT.<sup>27</sup> Our study has extended the existing evidence  
49  
50 270 by demonstrating that a greater MUAC was associated with higher prevalent risk of  
51  
52  
53 271 multiple cardiometabolic disorders including central obesity, hypertension, low HDL  
54  
55 272 cholesterol, and subclinical atherosclerosis in Chinese adults, particularly among  
56  
57  
58 273 women. Central obesity, hypertension, low HDL cholesterol, and subclinical  
59  
60

1  
2  
3 274 atherosclerosis have been robustly associated with increased risks of CVD, therefore  
4  
5 275 detecting more effective risk factors for these cardiometabolic disorders is critical to the  
6  
7 276 prevention of CVD. Our findings highlight the importance of paying more attention to  
8  
9  
10 277 women with higher MUAC in the early identification and precise prevention of  
11  
12 278 cardiometabolic disorders.

15 279 Explanations for the observations between MUAC and cardiometabolic risk are  
16  
17 280 multifactorial. Our study found that MUAC level tended to decrease with age and there  
18  
19 281 was a stronger association between MUAC and subclinical atherosclerosis among  
20  
21 282 women aged 62 years or older. Aging is a critical factor in the changing process of  
22  
23 283 metabolism and body composition. Fat-free mass and muscle mass reduced while  
24  
25 284 substantial visceral fat increased with aging, even under the condition of body weight  
26  
27 285 unchanged.<sup>27</sup> It has been documented that individuals aged greater than 65 years would  
28  
29 286 suffer a reduction in muscle mass over 25% per year; and this rate can be accelerated to  
30  
31 287 50% per year for those older than 80 years.<sup>27-29</sup> In addition, we found that MUAC was  
32  
33 288 associated with subclinical atherosclerosis in a sex-specific manner. One plausible  
34  
35 289 explanation for the sex difference in MUAC-subclinical atherosclerosis relationship  
36  
37 290 may be due to the biological differences between men and women, such as hormones  
38  
39 291 effect, immune system responses, muscle capacity and physical function. For instance,  
40  
41 292 men tend to have greater muscle capacity and higher muscle mass than women due to  
42  
43 293 higher levels of testosterone.<sup>23</sup> Body fat redistributes to upper body and to a preferential  
44  
45 294 adiposity around the waist with age and this trend was more obvious in women than in  
46  
47 295 men.<sup>29</sup> The sex difference in redistribution of body fat may partly contribute to the  
48  
49 296 observed more predominant associations between MUAC and cardiometabolic  
50  
51 297 disorders among women.  
52  
53  
54  
55  
56  
57  
58  
59  
60

1  
2  
3 298 The strength of this study is the comprehensive analyses of the association between  
4  
5 299 MUAC and a wide spectrum of cardiometabolic risk profiles in a well-defined  
6  
7 300 community setting with fair sized sample and desirable population homogeneity.  
8  
9  
10 301 Several limitations should be considered. First, due to a cross-sectional nature of the  
11  
12 302 present study, no causal inference can be drawn. Second, although our findings  
13  
14 303 supported that MUAC could be a reliable surrogate of upper body adiposity, MUAC is a  
15  
16 304 measurement which reflect both adipose and lean tissue rather than a direct indicator for  
17  
18 305 adiposity. Third, although we have carefully adjusted for multiple confounders, age-  
19  
20 306 related changes in body composition might influence these findings. Fourth, MUAC  
21  
22 307 measurement was performed on the left arm, though it should be determined on the non-  
23  
24 308 dominant arm. Given that the majority of Chinese population were right-handers,  
25  
26 309 measurement protocol employed in our study for MUAC was acceptable. Finally, this  
27  
28 310 study was restricted to middle-aged and elderly Chinese adults, and the generalizability  
29  
30 311 of our findings should be cautious to other demographic and ethnic populations.  
31  
32  
33  
34  
35

36 312 In conclusion, our study provided novel evidence of positive associations between  
37  
38 313 MUAC and cardiometabolic disorders as well as subclinical atherosclerosis in Chinese  
39  
40 314 population. Our findings suggest that MUAC, as a convenient and inexpensive  
41  
42 315 measurable metric, can be potentially used as a risk stratification indicator in the early  
43  
44 316 detection and prevention of CVD.  
45  
46  
47  
48  
49  
50  
51  
52  
53  
54  
55  
56  
57  
58  
59  
60

1  
2  
3 317 **Acknowledgments**  
4  
5

6 318 We thank all the study participants for their participation and contribution. The present  
7  
8 319 study would not have been possible without the participation of the participants.  
9  
10

11 320

12  
13  
14  
15 321 **Footnotes**  
16

17  
18 322 **Contributors:** All authors had full access to all the data in the study and take  
19  
20 323 responsibility for the integrity of the data and the accuracy of the data analysis. Study  
21  
22 324 concept and design: TW, MX, YB and WW. Acquisition of data: YH, XJ, LX, WZ, CD,  
23  
24 325 LW, ZZ, ML, JL, YX, and YC. Analysis and interpretation of data: YH, TW, MX, YB  
25  
26 326 and WW. Drafting of the manuscript: YH. Critical revision of the manuscript: TW, MX,  
27  
28 327 YB and WW. Statistical analysis: YH and XJ.  
29  
30

31  
32 328 **Funding:** This work was supported by grants from the National Natural Science  
33  
34 329 Foundation of China (81770842 and 81561128019), the Ministry of Science and  
35  
36 330 Technology of China (2018YFC1311705, 2016YFC1305600 and 2016YFC1304904),  
37  
38 331 the Shanghai Pujiang Program (18PJ1409600), the “Shanghai Municipal Education  
39  
40 332 Commission–Gaofeng Clinical Medicine Grant Support” from Shanghai Jiao Tong  
41  
42 333 University School of Medicine (20171901), the Shanghai Science and Technology  
43  
44 334 Commission (YDZX20173100004881), and the Shanghai Shen-Kang Hospital  
45  
46 335 Development Center (SHDC12016202).  
47  
48  
49

50  
51 336 **Competing interests:** None.  
52

53  
54 337 **Patient consent for publication:** Written informed consent was obtained from all study  
55  
56 338 participants.  
57  
58  
59  
60

- 1  
2  
3 339 **Ethics approval:** The study protocol was approved by the Institutional Review Board  
4  
5 340 of Ruijin Hospital Affiliated to Shanghai Jiao Tong University School of Medicine.  
6  
7  
8 341 **Provenance and peer review:** Not commissioned; externally peer reviewed.  
9  
10  
11 342 **Data sharing statement: No additional data available.**  
12  
13  
14  
15  
16  
17  
18  
19  
20  
21  
22  
23  
24  
25  
26  
27  
28  
29  
30  
31  
32  
33  
34  
35  
36  
37  
38  
39  
40  
41  
42  
43  
44  
45  
46  
47  
48  
49  
50  
51  
52  
53  
54  
55  
56  
57  
58  
59  
60

For peer review only

**343 References**

- 344 1. Hertle E, Stehouwer CD, Van Greevenbroek MM. The complement system in  
345 human cardiometabolic disease. *Mol Immunol* 2014; 61: 135-48.
- 346 2. Kaur J. A comprehensive review on metabolic syndrome. *Cardiol Res Pract* 2014;  
347 2014: 943162.
- 348 3. WHO (2015) Cardiovascular diseases (CVDs). Available from  
349 [www.who.int/mediacentre/factsheets/fs317/en/index.html](http://www.who.int/mediacentre/factsheets/fs317/en/index.html). Accessed 15 May 2016.
- 350 4. Leal J, Luengo-Fernández R, Gray A, et al. Economic burden of cardiovascular  
351 diseases in the enlarged European Union. *Eur Heart J* 2006; 27:1610–1619.
- 352 5. Mozaffarian D, Benjamin EJ, Go AS, et al. Heart disease and stroke statistics-2015  
353 update: A report from the American Heart Association. *Circulation* 2015; 131: e29-  
354 e322.
- 355 6. Mao Z, Wu F, Shan Y. Identification of key gens and miRNAs associated with  
356 carotid atherosclerosis based on mRNA-seq data. *Medicine* 2018; 97: e9832.
- 357 7. Fernández-Friera L, Peñalvo JL, Fernández-Ortiz A, et al. Prevalence, vascular  
358 distribution, and multiterritorial extent of subclinical atherosclerosis in a middle-  
359 aged cohort: The PESA (Progression of Early Subclinical Atherosclerosis) Study.  
360 *Circulation* 2015; 131: 2104-2113.
- 361 8. Lorenz MW, Markus HS, Bots ML, et al. Prediction of clinical cardiovascular  
362 events with carotid intima-media thickness: a systematic review and meta-analysis.  
363 *Circulation* 2007; 115: 459-467.
- 364 9. Fox CS, Massaro JM, Hoffmann U, et al. Abdominal visceral and subcutaneous  
365 adipose tissue compartments: association with metabolic risk factors in the  
366 Framingham Heart Study. *Circulation* 2007; 116: 39-48.
- 367 10. Nielsen S, Guo Z, Johnson CM, et al. Splanchnic lipolysis in human obesity. *J Clin*



- 1  
2  
3 368 Invest 2004; 113:1582-1588.  
4  
5 369 11. Ho SC, Wang JY, Kuo HP, et al. Mid-arm and calf circumferences are stronger  
6  
7 370 mortality predictors than body mass index for patients with chronic obstructive  
8  
9 371 pulmonary disease. *Int J Chron Obstruct Pulmon Dis* 2016; 11: 2075-2080.  
10  
11  
12 372 12. Ellen L, Wanda J, Lisette C. Associations between changes in anthropometric  
13  
14 373 measures and mortality in old age: a role for mid-upper arm circumference?  
15  
16 374 *JAMDA* 2013; 187e193.  
17  
18  
19 375 13. Mason C, Craig CL, Katzmarzyk PT. Influence of central and extremity  
20  
21 376 circumferences on all-cause mortality in men and women. *Obesity (Silver*  
22  
23 377 *Spring)* 2008; 16(12):2690-5.  
24  
25  
26 378 14. Bates CJ, Hamer M, Mishra GD. A study of relationships between bone-related  
27  
28 379 vitamins and minerals, related risk markers, and subsequent mortality in older  
29  
30 380 British people: the National Diet and Nutrition Survey of People Aged 65 Years  
31  
32 381 and Over. *Osteoporos Int* 2012; 23: 457-466.  
33  
34  
35 382 15. Suzuki A, Abdelmalek MF, Unalp-Arida A, et al. Regional anthropometric  
36  
37 383 measures and hepatic fibrosis in patients with nonalcoholic fatty liver disease. *Clin*  
38  
39 384 *Gastroenterol Hepatol*, 2010; 8(12): 1062-1069.  
40  
41  
42 385 16. Huang Y, Bi Y, Xu M, et al. Nonalcoholic fatty liver disease is associated with  
43  
44 386 atherosclerosis in middle-aged and elderly Chinese. *Arterioscler Thromb Vasc Biol*  
45  
46 387 2012; 32: 2321-2326.  
47  
48  
49 388 17. Chen Y, Xu M, Wang T, et al. Advanced fibrosis associates with atherosclerosis in  
50  
51 389 subjects with nonalcoholic fatty liver disease. *Atherosclerosis* 2015; 241: 145-150.  
52  
53  
54 390 18. Craig CL, Marshall AL, Sjöström M, et al. International physical activity  
55  
56 391 questionnaire: 12-country reliability and validity. *Med Sci Sports Exerc* 2003;  
57  
58 392 35:1381-1395.  
59  
60

- 1  
2  
3 393 19. Gul Sagun, Aytekin Oguz, Engin Karagoz, et al. Application of alternative  
4  
5 394 anthropometric measurements to predict metabolic syndrome. *Clinics* 2014; 69:  
6  
7 395 347-353.  
8  
9  
10 396 20. Alberti KG, Zimmet PZ. Definition, diagnosis and classification of diabetes  
11  
12 397 mellitus and its complications. Part 1: diagnosis and classification of diabetes  
13  
14 398 mellitus provisional report of a WHO consultation. *Diabet Med.* 1998, 15(7): 539-  
15  
16 399 553.  
17  
18  
19 400 21. Chen Y, Xu M, Wang T, et al. Advanced fibrosis associates with atherosclerosis in  
20  
21 401 subjects with nonalcoholic fatty liver disease. *Atherosclerosis* 2015; 241:145-150.  
22  
23  
24 402 22. Ogden CL, Carroll MD, Curtin LR, et al. Prevalence of overweight and obesity in  
25  
26 403 the United States, 1999–2004. *JAMA* 2006; 295: 1549-55.  
27  
28  
29 404 23. Wu LW, Lin YY, Kao TW, et al. Mid-arm circumference and all Cause,  
30  
31 405 cardiovascular, and cancer mortality among obese and non-obese US adults: the  
32  
33 406 National Health and Nutrition Examination Survey III. *Sci Rep* 2017; 7: 2302.  
34  
35  
36 407 24. Kentaro Kamiya, Takashi Masuda, Yuya Matsue, et al. Complementary role of arm  
37  
38 408 circumference to body massindex in risk stratification in heart failure. *JACC Heart*  
39  
40 409 *Fail.* 2016; 4(4):265-73.  
41  
42  
43 410 25. Araújo AJ, Santos AC, Prado WL. Body composition of obese adolescents:  
44  
45 411 association between adiposity indicators and cardiometabolic risk factors. *J Hum*  
46  
47 412 *Nutr Diet* 2017; 30(2):193-202.  
48  
49  
50 413 26. Wenzhen Ge, Faruque Parvez, Fen Wu, et al. Association between anthropometric  
51  
52 414 measures of obesity and subclinical atherosclerosis in Bangladesh. *Atherosclerosis*  
53  
54 415 2014; 232(1): 234–241.  
55  
56  
57 416 27. Tom SE, Cooper R, Patel KV, Guralnik JM. Menopausal characteristics and  
58  
59 417 physical functioning in older adulthood in the NHANES III. *Menopause (New*  
60

- 1  
2  
3 418 York, NY) 2012; 19: 283.  
4  
5 419 28. Neff LM, Hoffmann ME, Zeiss DM, et al. Core body temperature is lower in  
6  
7 420 postmenopausal female than premenopausal female: potential implications for  
8  
9 421 energy metabolism and midlife weight gain. *Cardiovasc Endocrinol* 2016; 5: 151-  
10  
11 422 154.  
12  
13  
14 423 29. Jonathan CK Wells, Philip Treleaven, and Tim J Cole. BMI compared with  
15  
16 424 dimensional body shape: the UK National Sizing Survey. *Am J Clin Nutr* 2007;  
17  
18 425 85:419–25.  
19  
20  
21  
22  
23  
24  
25  
26  
27  
28  
29  
30  
31  
32  
33  
34  
35  
36  
37  
38  
39  
40  
41  
42  
43  
44  
45  
46  
47  
48  
49  
50  
51  
52  
53  
54  
55  
56  
57  
58  
59  
60

1  
2  
3 426 **Figure legends**  
4

5 427 **Figure 1. Stratification analysis of the association between MUAC and subclinical**

6  
7 428 **atherosclerosis in women.** A: All participants were divided into subgroups based on

8 429 their average age (age < 62 years, age  $\geq$  62 years), body mass index (BMI < 25 kg/m<sup>2</sup>,

9  
10 430 BMI  $\geq$  25 kg/m<sup>2</sup>), or waist circumference (WC < 88 cm or WC  $\geq$  88 cm). B: All

11  
12  
13  
14 431 participants were divided into subgroups based on diabetes (yes or no), insulin

15  
16 432 resistance (yes or no), or hypertension (yes or no). Data were presented as odds ratio

17  
18 433 (OR) and 95% confidence interval (CI). *P* values were calculated from multivariable

19  
20 434 logistic regression analysis. Adjusted for age (years), body mass index (kg/m<sup>2</sup>), current

21  
22 435 smoking (yes or no), current drinking (yes or no), physical activity (MET-h/wk), WC

23  
24 436 (cm), C-reactive protein (mg/L), total cholesterol (mmol/L), HDL cholesterol (mmol/L),

25  
26 437 LDL cholesterol (mmol/L), triglycerides (mmol/L), fasting plasma glucose (mmol/L),

27  
28 438 and systolic blood pressure (mmHg).  
29  
30  
31  
32

33 439 **Figure 2. Association between MUAC and subclinical atherosclerosis according to**

34  
35 440 **combined categories of BMI and WC.** A: MUAC in the BMI and WC subgroups in

36  
37 441 women. B: Association of MUAC with risk of subclinical atherosclerosis in the BMI

38  
39 442 and WC subgroups in women. MUAC: mid-upper arm circumference, BMI: body mass

40  
41 443 index, WC: waist circumference. Adjusted for age (years), body mass index (kg/m<sup>2</sup>),

42  
43 444 current smoking (yes or no), current drinking (yes or no), physical activity (MET-h/wk),

44  
45 445 WC (cm), C-reactive protein (mg/L), total cholesterol (mmol/L), HDL cholesterol

46  
47 446 (mmol/L), LDL cholesterol (mmol/L), triglycerides (mmol/L), fasting plasma glucose

48  
49 447 (mmol/L), and systolic blood pressure (mmHg).  
50  
51  
52  
53  
54  
55  
56  
57  
58  
59  
60

**Table 1. Characteristics of study participants according to quartiles of mid-upper arm circumference**

|                                 | Mid-upper arm circumference, cm |                           |                           |                           | P for trend |
|---------------------------------|---------------------------------|---------------------------|---------------------------|---------------------------|-------------|
|                                 | Quartile 1<br>(15.5-27.1)       | Quartile 2<br>(27.2-29.1) | Quartile 3<br>(29.2-31.2) | Quartile 4<br>(31.3-43.3) |             |
| n                               | 1510                            | 1570                      | 1582                      | 1625                      |             |
| Age (years)                     | 63.4 ± 9.2                      | 62.2 ± 8.8                | 61.7 ± 8.6                | 61.6 ± 8.4                | < 0.0001    |
| Female, n (%)                   | 1110 (27.9)                     | 1048 (26.4)               | 922 (23.2)                | 897 (22.6)                |             |
| Body mass index (kg/m2)         | 22.3 ± 2.8                      | 24.2 ± 3.8                | 25.5 ± 3.2                | 27.9 ± 7.5                | < 0.0001    |
| Waist circumference (cm)        | 75.6 ± 8.5                      | 81.4 ± 7.9                | 85.5 ± 8.3                | 91.6 ± 9.2                | < 0.0001    |
| Systolic blood pressure (mmHg)  | 132.6 ± 18.0                    | 133.4 ± 17.3              | 136.0 ± 17.2              | 137.0 ± 16.4              | < 0.0001    |
| Diastolic blood pressure (mmHg) | 74.2 ± 9.5                      | 75.7 ± 9.3                | 77.2 ± 9.2                | 78.0 ± 9.8                | < 0.0001    |
| Current smoking, n (%)          | 196 (13.0)                      | 279 (17.8)                | 346 (21.9)                | 393 (24.2)                | < 0.0001    |
| Current drinking, n (%)         | 151 (10)                        | 195 (12.4)                | 256 (16.2)                | 290 (17.9)                | < 0.0001    |
| Physical activity (MET-h/wk)    | 21.0 (6.0-21.0)                 | 15.3 (3.0-21.0)           | 15.0 (3.0-21.0)           | 15.0 (3.0-21.0)           | 0.30        |
| Fasting plasma glucose (mmol/L) | 5.99 ± 1.36                     | 6.06 ± 1.34               | 6.21 ± 1.57               | 6.28 ± 1.61               | < 0.0001    |
| HOMA-IR                         | 1.42 (0.99-2.15)                | 1.75 (1.20-2.57)          | 1.95 (1.35-2.86)          | 2.43 (1.69-3.55)          | < 0.0001    |
| Total cholesterol (mmol/L)      | 5.28 ± 0.95                     | 5.31 ± 0.98               | 5.26 ± 1.04               | 5.24 ± 1.08               | 0.20        |
| LDL cholesterol (mmol/L)        | 3.56 ± 0.75                     | 3.62 ± 0.77               | 3.62 ± 0.83               | 3.63 ± 0.81               | 0.02        |

|                                    |                  |                  |                  |                  |          |
|------------------------------------|------------------|------------------|------------------|------------------|----------|
| HDL cholesterol (mmol/L)           | 1.42 ± 0.33      | 1.35 ± 0.29      | 1.31 ± 0.29      | 1.27 ± 0.27      | < 0.0001 |
| Triglycerides (mmol/L)             | 1.33 (0.98-1.84) | 1.49 (1.07-2.12) | 1.58 (1.12-2.25) | 1.66 (1.19-2.30) | < 0.0001 |
| C-reactive protein (mg/L)          | 0.19 (0.14-0.28) | 0.21 (0.16-0.31) | 0.23(0.17-0.35)  | 0.25(0.18-0.39)  | < 0.0001 |
| CIMT (mm)                          | 0.69 ± 0.16      | 0.70 ± 0.15      | 0.70 ± 0.14      | 0.72 ± 0.14      | < 0.0001 |
| Insulin resistance, n (%)          | 203 (13.5)       | 313 (20.0)       | 410 (26.0)       | 655 (40.5)       | < 0.0001 |
| Hypertension, n (%)                | 747 (49.5)       | 862 (52.7)       | 978 (61.9)       | 1108 (68.3)      | < 0.0001 |
| Diabetes, n (%)                    | 368 (24.7)       | 403 (25.9)       | 457 (29.2)       | 533 (33.2)       | < 0.0001 |
| Subclinical atherosclerosis, n (%) | 472 (31.3)       | 541 (34.5)       | 555 (35.1)       | 590 (36.3)       | 0.0035   |

Data are presented as means ± standard deviation (SD), or medians (interquartile ranges) for skewed variables, or number (proportions) for categorical variables. *P* values were calculated from one-way analysis of variance (ANOVA) for continuous variables and chi-square test for categorical variables. Subclinical atherosclerosis was defined as CIMT ≥ 0.8 mm, which is the cut-off point for the highest quartile of the total participants. Insulin resistance was defined as HOMA-IR ≥ 2.8, which is the cut-off point for the highest quartile of the total participants. Abbreviations: MET, metabolic equivalent task; LDL, low-density lipoprotein; HDL, high-density lipoprotein; CIMT, carotid intima-media thickness; HOMA-IR indicates homeostasis model assessment of insulin resistance.

**Table 2. Association between mid-upper arm circumference and multiple cardiometabolic disorders in total and sex-specific participants**

|                      |         | OR (95% CI) |                  |                  |                  |                  | P for trend |
|----------------------|---------|-------------|------------------|------------------|------------------|------------------|-------------|
|                      |         | Quartile 1  | Quartile 2       | Quartile 3       | Quartile 4       | 1-SD (3.13 cm)   |             |
| <b>Total</b>         |         |             |                  |                  |                  |                  |             |
| Central obesity      | Model 1 | 1.00        | 1.43 (0.99-2.05) | 3.44 (2.45-4.82) | 7.25 (5.12-10.3) | 2.05 (1.85-2.28) | < 0.0001    |
|                      | Model 2 | 1.00        | 1.43 (0.99-2.05) | 3.44 (2.45-4.82) | 7.25 (5.12-10.3) | 2.05 (1.85-2.28) | < 0.0001    |
| Diabetes             | Model 1 | 1.00        | 1.00 (0.82-1.21) | 1.13 (0.93-1.37) | 1.26 (1.02-1.55) | 1.09 (1.02-1.16) | 0.02        |
|                      | Model 2 | 1.00        | 0.87 (0.73-1.06) | 0.89 (0.73-1.10) | 0.87 (0.70-1.09) | 0.96 (0.90-1.04) | 0.33        |
| Hypertension         | Model 1 | 1.00        | 1.04 (0.87-1.24) | 1.57 (1.30-1.89) | 1.65 (1.34-2.04) | 1.21 (1.14-1.30) | < 0.0001    |
|                      | Model 2 | 1.00        | 0.92 (0.77-1.10) | 1.29 (1.06-1.56) | 1.23 (0.98-1.53) | 1.10 (1.03-1.19) | 0.006       |
| Hypertriglyceridemia | Model 1 | 1.00        | 1.55 (1.25-1.92) | 1.78 (1.43-2.21) | 1.92 (1.53-2.41) | 1.24 (1.15-1.35) | < 0.0001    |
|                      | Model 2 | 1.00        | 1.31 (1.05-1.63) | 1.32 (1.05-1.66) | 1.19 (0.93-1.54) | 1.03 (0.94-1.13) | 0.28        |
| Low HDL cholesterol  | Model 1 | 1.00        | 1.40 (1.06-1.84) | 1.80 (1.38-2.35) | 2.06 (1.57-2.69) | 1.26 (1.16-1.37) | < 0.0001    |

|                      |         |      |                  |                  |                  |                  |          |
|----------------------|---------|------|------------------|------------------|------------------|------------------|----------|
|                      | Model 2 | 1.00 | 1.21 (0.91-1.60) | 1.41 (1.06-1.86) | 1.38 (1.02-1.88) | 1.10 (1.01-1.22) | 0.03     |
| <b>Women</b>         |         |      |                  |                  |                  |                  |          |
| Central obesity      | Model 1 | 1.00 | 1.49 (1.04-2.15) | 3.54 (2.50-4.99) | 7.10 (4.97-10.2) | 2.01 (1.81-2.25) | < 0.0001 |
|                      | Model 2 | 1.00 | 1.49 (1.04-2.15) | 3.54 (2.50-4.99) | 7.10 (4.97-10.2) | 2.01 (1.81-2.25) | < 0.0001 |
| Diabetes             | Model 1 | 1.00 | 1.11 (0.89-1.41) | 1.29 (1.01-1.65) | 1.39 (1.07-1.80) | 1.12 (1.03-1.22) | 0.007    |
|                      | Model 2 | 1.00 | 0.98 (0.77-1.24) | 1.03 (0.80-1.32) | 0.97 (0.73-1.29) | 0.99 (0.91-1.09) | 0.93     |
| Hypertension         | Model 1 | 1.00 | 1.10 (0.89-1.35) | 1.93 (1.54-2.44) | 1.80 (1.39-2.33) | 1.27 (1.17-1.38) | < 0.0001 |
|                      | Model 2 | 1.00 | 0.96 (0.78-1.18) | 1.55 (1.23-1.97) | 1.29 (0.98-1.68) | 1.14 (1.05-1.24) | 0.003    |
| Hypertriglyceridemia | Model 1 | 1.00 | 1.63 (1.28-2.01) | 1.89 (1.48-2.42) | 1.84 (1.42-2.38) | 1.25 (1.15-1.37) | < 0.0001 |
|                      | Model 2 | 1.00 | 1.38 (1.08-1.78) | 1.43 (1.09-1.86) | 1.17 (0.87-1.58) | 1.05 (0.94-1.17) | 0.33     |
| Low HDL cholesterol  | Model 1 | 1.00 | 1.67 (1.17-2.38) | 1.94 (1.36-2.77) | 1.87 (1.29-2.71) | 1.21 (1.09-1.35) | 0.0007   |
|                      | Model 2 | 1.00 | 1.47 (1.03-2.21) | 1.56 (1.07-2.28) | 1.32 (0.86-2.01) | 1.08 (0.91-1.23) | 0.23     |



**Men**

|                      |         |      |                  |                  |                  |                  |          |
|----------------------|---------|------|------------------|------------------|------------------|------------------|----------|
| Central obesity      | Model 1 | 1.00 | 0.38 (0.02-6.61) | 3.99 (0.49-32.0) | 10.4 (1.33-81.2) | 3.08 (1.92-4.95) | < 0.0001 |
|                      | Model 2 | 1.00 | 0.38 (0.02-6.61) | 3.99 (0.49-32.0) | 10.4 (1.33-81.2) | 3.08 (1.92-4.95) | < 0.0001 |
| Diabetes             | Model 1 | 1.00 | 0.79 (0.56-1.10) | 0.85 (0.61-1.18) | 0.97 (0.68-1.38) | 1.01 (0.90-1.13) | 0.84     |
|                      | Model 2 | 1.00 | 0.69 (0.49-0.98) | 0.68 (0.48-0.97) | 0.69 (0.47-1.01) | 0.91 (0.81-1.03) | 0.12     |
| Hypertension         | Model 1 | 1.00 | 0.92 (0.66-1.29) | 1.06 (0.76-1.48) | 1.29 (0.89-1.88) | 1.10 (0.98-1.24) | 0.10     |
|                      | Model 2 | 1.00 | 0.84 (0.60-1.17) | 0.91 (0.65-1.28) | 1.03 (0.70-1.52) | 1.03 (0.91-1.16) | 0.68     |
| Hypertriglyceridemia | Model 1 | 1.00 | 1.37 (0.85-2.21) | 1.46 (0.92-2.31) | 1.66 (1.03-2.67) | 1.13 (0.96-1.32) | 0.04     |
|                      | Model 2 | 1.00 | 1.19 (0.73-1.92) | 1.15 (0.72-1.84) | 1.13 (0.68-1.87) | 0.97 (0.81-1.52) | 0.81     |
| Low HDL cholesterol  | Model 1 | 1.00 | 1.01 (0.65-1.58) | 1.42 (0.94-2.16) | 1.62 (1.04-2.51) | 1.21 (1.06-1.38) | 0.006    |
|                      | Model 2 | 1.00 | 0.92 (0.59-1.44) | 1.22 (0.79-1.86) | 1.27 (0.80-2.01) | 1.12 (0.97-1.29) | 0.13     |

Data were presented as odds ratio (OR) and 95% confidence interval (CI). *P* values were calculated from multivariable logistic regression analysis in quartile of mid-upper arm circumference. Model 1: adjusted for age (years), sex, body mass index (kg/m<sup>2</sup>), current smoking (yes or no), current drinking (yes or no), physical activity (MET-h/wk); Model 2: further adjusted for waist circumference (cm), except for central obesity.

**Table 3. Association between mid-upper arm circumference and subclinical atherosclerosis in total and sex-specific participants**

|                    | OR (95% CI) |                  |                  |                  |                  | <i>P</i> for trend |
|--------------------|-------------|------------------|------------------|------------------|------------------|--------------------|
|                    | Quartile 1  | Quartile 2       | Quartile 3       | Quartile 4       | 1-SD (3.13 cm)   |                    |
| <b>Total</b>       |             |                  |                  |                  |                  | 0.20*              |
| Cases/Participants | 472 / 1510  | 541 / 1570       | 555 / 1582       | 590 / 1625       | 2158 / 6287      |                    |
| Model 1            | 1.00        | 1.16 (1.00-1.34) | 1.19 (1.02-1.38) | 1.25 (1.08-1.45) | 1.06 (1.01-1.12) | 0.004              |
| Model 2            | 1.00        | 1.30 (1.08-1.56) | 1.30 (1.07-1.58) | 1.35 (1.09-1.67) | 1.06 (0.98-1.15) | 0.013              |
| Model 3            | 1.00        | 1.31 (1.09-1.58) | 1.33 (1.10-1.62) | 1.45 (1.16-1.80) | 1.08 (0.99-1.17) | 0.005              |
| <b>Women</b>       |             |                  |                  |                  |                  |                    |
| Case/participants  | 287 / 1110  | 327 / 1048       | 275 / 922        | 282 / 897        | 1171 / 3977      |                    |
| Model 1            | 1.00        | 1.30 (1.08-1.57) | 1.22 (1.00-1.48) | 1.32 (1.09-1.60) | 1.07 (1.00-1.14) | 0.014              |
| Model 2            | 1.00        | 1.54 (1.24-1.93) | 1.43 (1.18-1.82) | 1.53 (1.17-2.02) | 1.11 (1.01-1.23) | 0.007              |
| Model 3            | 1.00        | 1.54 (1.24-1.93) | 1.42 (1.11-1.83) | 1.66 (1.26-2.20) | 1.14 (1.03-1.26) | 0.002              |

**Men**

|                   |           |                  |                  |                  |                  |      |
|-------------------|-----------|------------------|------------------|------------------|------------------|------|
| Case/participants | 185 / 400 | 214 / 522        | 280 / 660        | 308 / 728        | 987 / 2310       |      |
| Model 1           | 1.00      | 0.81 (0.62-1.05) | 0.86 (0.67-1.10) | 0.85 (0.67-1.09) | 0.93 (0.85-1.02) | 0.39 |
| Model 2           | 1.00      | 0.89 (0.64-1.23) | 1.04 (0.75-1.44) | 1.00 (0.70-1.45) | 0.97 (0.85-1.11) | 0.71 |
| Model 3           | 1.00      | 0.90 (0.65-1.25) | 1.06 (0.76-1.48) | 1.05 (0.72-1.52) | 0.99 (0.86-1.06) | 0.54 |

Data were presented as odds ratio (OR) and 95% confidence interval (CI). *P* values were calculated from multivariable logistic regression analysis. \*: the interaction of MUAC with sex on subclinical atherosclerosis. Model 1, unadjusted; Model 2, adjusted for age (years), sex, body mass index (kg/m<sup>2</sup>), current smoking (yes or no), current drinking (yes or no), physical activity (MET-h/wk), waist circumference (cm); Model 3, further adjusted for C-reactive protein (mg/L), total cholesterol (mmol/L), HDL cholesterol (mmol/L), LDL cholesterol (mmol/L), triglycerides (mmol/L), fasting plasma glucose (mmol/L), and systolic blood pressure (mmHg).



Figure 1

338x190mm (300 x 300 DPI)

1  
2  
3  
4  
5  
6  
7  
8  
9  
10  
11  
12  
13  
14  
15  
16  
17  
18  
19  
20  
21  
22  
23  
24  
25  
26  
27  
28  
29  
30  
31  
32  
33  
34  
35  
36  
37  
38  
39  
40  
41  
42  
43  
44  
45  
46  
47  
48  
49  
50  
51  
52  
53  
54  
55  
56  
57  
58  
59  
60



Figure 2

199x176mm (300 x 300 DPI)

## Online Supplemental Information

### Association between mid-upper arm circumference and cardiometabolic risk in Chinese population: a cross-sectional study

**Supplemental Table 1.** The association of mid-upper arm circumference with cardiometabolic profiles in total participants

#### Supplemental Figure Legend

**Supplemental Figure 1.** Stratified analysis of the association of mid-upper arm circumference with risk of subclinical atherosclerosis in men. A: All subjects were divided into subgroups based on their average age (age < 62 years, age  $\geq$  62 years), body mass index (BMI < 25 kg/m<sup>2</sup>, BMI  $\geq$  25 kg/m<sup>2</sup>), or waist circumference (WC < 88 cm or WC  $\geq$  88 cm). B: All subjects were divided into subgroups based on diabetes (yes or no), insulin resistance (yes or no), or hypertension (yes or no). Data were presented as odds ratio (OR) and 95% confidence interval (CI). *P* values were calculated from multivariable logistic regression analysis. Adjusted for age (years), body mass index (kg/m<sup>2</sup>), current smoking (yes or no), current drinking (yes or no), physical activity (MET-h/wk), waist circumference (cm), C-reactive protein (mg/L), total cholesterol (mmol/L), HDL cholesterol (mmol/L), LDL cholesterol (mmol/L), triglycerides (mmol/L), fasting plasma glucose (mmol/L), and systolic blood pressure (mmHg).

**Supplemental Table 1. The association of mid-upper arm circumference with cardiometabolic profiles in total participants**

|                                      | Model 1            |         | Model 2           |         | Model 3            |         |
|--------------------------------------|--------------------|---------|-------------------|---------|--------------------|---------|
|                                      | $\beta \pm SE$     | P value | $\beta \pm SE$    | P value | $\beta \pm SE$     | P value |
| Age (years)                          | -0.20 $\pm$ 0.04   | <0.0001 | /                 | /       | /                  | /       |
| Body mass index (kg/m <sup>2</sup> ) | 0.70 $\pm$ 0.02    | <0.0001 | /                 | /       | /                  | /       |
| Waist circumference (cm)             | 1.94 $\pm$ 0.03    | <0.0001 | 1.62 $\pm$ 0.04   | <0.0001 | /                  | /       |
| Systolic blood pressure (mmHg)       | 0.55 $\pm$ 0.07    | <0.0001 | 0.49 $\pm$ 0.09   | <0.0001 | 0.20 $\pm$ 0.10    | 0.04    |
| Diastolic blood pressure (mmHg)      | 0.49 $\pm$ 0.04    | <0.0001 | 0.32 $\pm$ 0.05   | <0.0001 | 0.08 $\pm$ 0.06    | 0.15    |
| Fasting plasma glucose (mmol/L)      | 0.03 $\pm$ 0.01    | <0.0001 | 0.02 $\pm$ 0.01   | 0.01    | -0.02 $\pm$ 0.01   | 0.04    |
| HOMA-IR                              | 0.03 $\pm$ 0.001   | <0.0001 | 0.02 $\pm$ 0.001  | <0.0001 | 0.01 $\pm$ 0.002   | 0.0003  |
| Total cholesterol (mmol/L)           | -0.004 $\pm$ 0.004 | 0.30    | 0.004 $\pm$ 0.005 | 0.48    | -0.01 $\pm$ 0.01   | 0.24    |
| LDL cholesterol (mmol/L)             | 0.009 $\pm$ 0.003  | 0.005   | 0.01 $\pm$ 0.004  | 0.001   | 0.001 $\pm$ 0.005  | 0.79    |
| HDL cholesterol (mmol/L)             | -0.02 $\pm$ 0.001  | <0.0001 | -0.01 $\pm$ 0.001 | <0.0001 | -0.003 $\pm$ 0.002 | 0.08    |

|                           |              |         |              |         |              |       |
|---------------------------|--------------|---------|--------------|---------|--------------|-------|
| Triglycerides (mmol/L)    | 0.01 ±0.001  | <0.0001 | 0.01 ±0.001  | <0.0001 | 0.001 ±0.001 | 0.38  |
| C-reactive protein (mg/L) | 0.01 ±0.001  | <0.0001 | 0.01 ±0.001  | <0.0001 | 0.002 ±0.002 | 0.12  |
| CIMT (cm)                 | 0.003 ±0.001 | <0.0001 | 0.003 ±0.001 | 0.0002  | 0.002 ±0.001 | 0.005 |

Data are linear regression estimates ± standard error ( $\beta \pm SE$ ). P values were calculated from multivariable linear regression model. Model 1: unadjusted;

Model 2: adjusted for age (years), sex, body mass index (kg/m<sup>2</sup>), current smoking (yes or no), current drinking (yes or no), physical activity (MET-h/wk);

Model 3: further adjusted for waist circumference (cm). Abbreviations: LDL, low-density lipoprotein; HDL, high-density lipoprotein; CIMT, carotid

intima-media thickness.



## Supplemental Figure 1

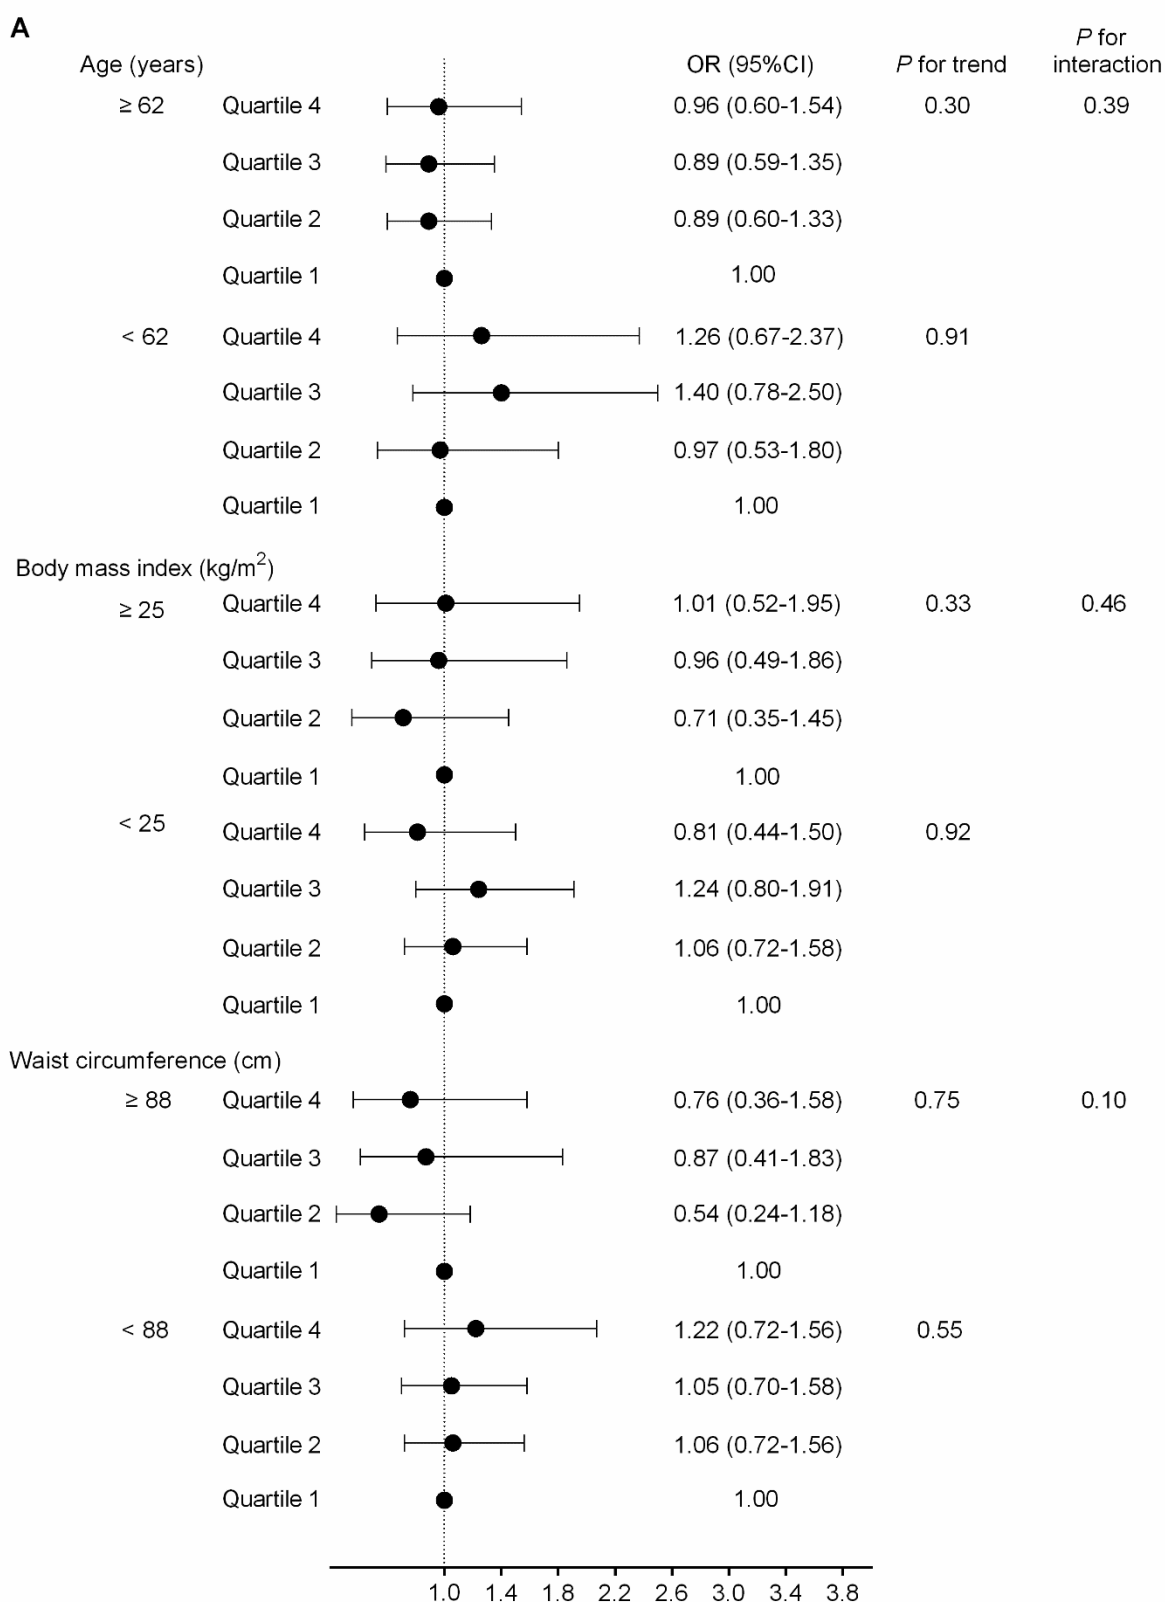

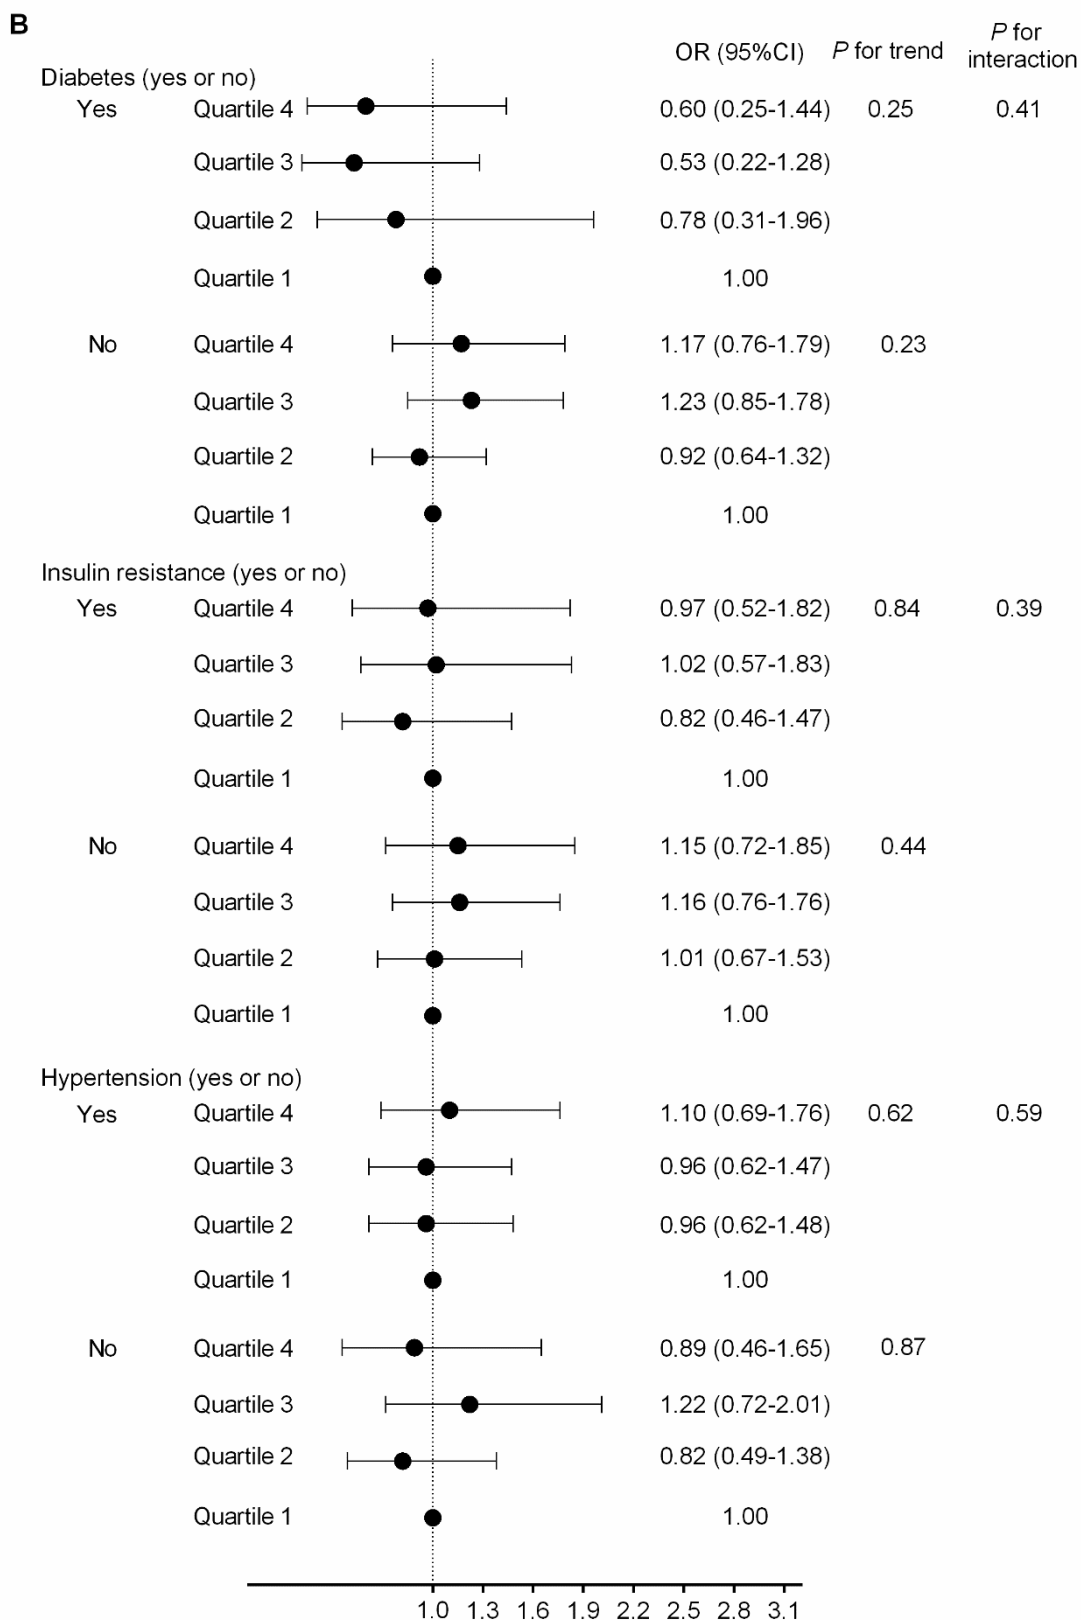

1  
2  
3  
4  
5  
6  
7  
8  
9  
10  
11  
12  
13  
14  
15  
16  
17  
18  
19  
20  
21  
22  
23  
24  
25  
26  
27  
28  
29  
30  
31  
32  
33  
34  
35  
36  
37  
38  
39  
40  
41  
42  
43  
44  
45  
46

For peer review only

STROBE Statement—Checklist of items that should be included in reports of *cross-sectional studies*

|                           | Item No | Recommendation                                                                                                                                                                                               | Page number |
|---------------------------|---------|--------------------------------------------------------------------------------------------------------------------------------------------------------------------------------------------------------------|-------------|
| <b>Title and abstract</b> | 1       | (a) Indicate the study's design with a commonly used term in the title or the abstract                                                                                                                       | Page 1      |
|                           |         | (b) Provide in the abstract an informative and balanced summary of what was done and what was found                                                                                                          | Page 2-3    |
| <b>Introduction</b>       |         |                                                                                                                                                                                                              |             |
| Background/rationale      | 2       | Explain the scientific background and rationale for the investigation being reported                                                                                                                         | Page 4-5    |
| Objectives                | 3       | State specific objectives, including any prespecified hypotheses                                                                                                                                             | Page 5      |
| <b>Methods</b>            |         |                                                                                                                                                                                                              |             |
| Study design              | 4       | Present key elements of study design early in the paper                                                                                                                                                      | Page 5      |
| Setting                   | 5       | Describe the setting, locations, and relevant dates, including periods of recruitment, exposure, follow-up, and data collection                                                                              | Page 5-6    |
| Participants              | 6       | (a) Give the eligibility criteria, and the sources and methods of selection of participants                                                                                                                  | Page 5-6    |
| Variables                 | 7       | Clearly define all outcomes, exposures, predictors, potential confounders, and effect modifiers. Give diagnostic criteria, if applicable                                                                     | Page 6-8    |
| Data sources/measurement  | 8*      | For each variable of interest, give sources of data and details of methods of assessment (measurement). Describe comparability of assessment methods if there is more than one group                         | Page 6-8    |
| Bias                      | 9       | Describe any efforts to address potential sources of bias                                                                                                                                                    | Page 5-8    |
| Study size                | 10      | Explain how the study size was arrived at                                                                                                                                                                    | Page 5-6    |
| Quantitative variables    | 11      | Explain how quantitative variables were handled in the analyses. If applicable, describe which groupings were chosen and why                                                                                 | Page 8-9    |
| Statistical methods       | 12      | (a) Describe all statistical methods, including those used to control for confounding                                                                                                                        | Page 8-9    |
|                           |         | (b) Describe any methods used to examine subgroups and interactions                                                                                                                                          | Page 8-9    |
|                           |         | (c) Explain how missing data were addressed                                                                                                                                                                  | Page 6      |
|                           |         | (d) If applicable, describe analytical methods taking account of sampling strategy                                                                                                                           |             |
|                           |         | (e) Describe any sensitivity analyses                                                                                                                                                                        | Page 9      |
| <b>Results</b>            |         |                                                                                                                                                                                                              |             |
| Participants              | 13*     | (a) Report numbers of individuals at each stage of study—eg numbers potentially eligible, examined for eligibility, confirmed eligible, included in the study, completing follow-up, and analysed            | Page 6      |
|                           |         | (b) Give reasons for non-participation at each stage                                                                                                                                                         |             |
|                           |         | (c) Consider use of a flow diagram                                                                                                                                                                           |             |
| Descriptive data          | 14*     | (a) Give characteristics of study participants (eg demographic, clinical, social) and information on exposures and potential confounders                                                                     | Page 10-12  |
|                           |         | (b) Indicate number of participants with missing data for each variable of interest                                                                                                                          |             |
| Outcome data              | 15*     | Report numbers of outcome events or summary measures                                                                                                                                                         | Page 10-12  |
| Main results              | 16      | (a) Give unadjusted estimates and, if applicable, confounder-adjusted estimates and their precision (eg, 95% confidence interval). Make clear which confounders were adjusted for and why they were included | Page 10-12  |

1  
2  
3  
4  
5  
6  
7  
8  
9  
10  
11  
12  
13  
14  
15  
16  
17  
18  
19  
20  
21  
22  
23  
24  
25  
26  
27  
28  
29  
30  
31  
32  
33  
34  
35  
36  
37  
38  
39  
40  
41  
42  
43  
44  
45  
46  
47  
48  
49  
50  
51  
52  
53  
54  
55  
56  
57  
58  
59  
60

|                          |    |                                                                                                                                                                            |            |
|--------------------------|----|----------------------------------------------------------------------------------------------------------------------------------------------------------------------------|------------|
|                          |    | (b) Report category boundaries when continuous variables were categorized                                                                                                  | Page 11    |
|                          |    | (c) If relevant, consider translating estimates of relative risk into absolute risk for a meaningful time period                                                           |            |
| Other analyses           | 17 | Report other analyses done—eg analyses of subgroups and interactions, and sensitivity analyses                                                                             | Page 11-12 |
| <b>Discussion</b>        |    |                                                                                                                                                                            |            |
| Key results              | 18 | Summarise key results with reference to study objectives                                                                                                                   | Page 12-13 |
| Limitations              | 19 | Discuss limitations of the study, taking into account sources of potential bias or imprecision. Discuss both direction and magnitude of any potential bias                 | Page 14    |
| Interpretation           | 20 | Give a cautious overall interpretation of results considering objectives, limitations, multiplicity of analyses, results from similar studies, and other relevant evidence | Page 13-14 |
| Generalisability         | 21 | Discuss the generalisability (external validity) of the study results                                                                                                      | Page 14    |
| <b>Other information</b> |    |                                                                                                                                                                            |            |
| Funding                  | 22 | Give the source of funding and the role of the funders for the present study and, if applicable, for the original study on which the present article is based              | Page 15    |

\*Give information separately for exposed and unexposed groups.

**Note:** An Explanation and Elaboration article discusses each checklist item and gives methodological background and published examples of transparent reporting. The STROBE checklist is best used in conjunction with this article (freely available on the Web sites of PLoS Medicine at <http://www.plosmedicine.org/>, Annals of Internal Medicine at <http://www.annals.org/>, and Epidemiology at <http://www.epidem.com/>). Information on the STROBE Initiative is available at [www.strobe-statement.org](http://www.strobe-statement.org).
